# Supplementary material for: Cross-Predicting Essential Genes between Two Model Eukaryotic Species Using Machine Learning
Source: Int J Mol Sci. 2021 May 11;22(10):5056. doi: 10.3390/ijms22105056 (PMC8150380; doi:10.3390/ijms22105056)
Supplement: Supplementary file 1 [file ijms-22-05056-s001.zip › Supplementary_Tables_S1-S6.xlsx]

## Sheet: TableS1
Table S1. Select predictive features and importance for predictions within C. elegans using six ML models.
Features that contribute most for discrimination between essential and non-essential genes within species in D. melanogaster were selected from a range of features available for both C. elegans and D. melanogaster.
Their relative importance determined by the machine learning models: Gradient Boosting Machines (GBM), Generalised Linear Models), Neural Networks (NN), Random Forest (RF), Support-Vector Machines and eXtreme Gradient Boosting Machines (XGB).
Feature	GBM	GLM	NN	RF	SVM	XGB	Median	Source
num_cells_expressed	100	43.3193	99.9349	100	99.9349	100	99.9349	scRNA-seq
OMA_orthologs	88.7677	24.5839	100	88.0857	100	62.474	88.7677	Orthologs: OMA database
ChIP_H3K4me3	36.397	60.0949	80.5189	38.7607	80.5189	33.4849	60.0949	ChIP-seq
exons	6.96738	86.7888	62.2901	16.9307	62.2901	20.6261	62.2901	Genomic
PseDNC_Xc1.CG	4.70858	72.2949	74.2202	7.09567	74.2202	9.97233	72.2949	Nucleotide sequence
Cytoplasm	9.5257	100	57.4287	20.8499	57.4287	11.5107	57.4287	Subcellular localisation prediction
Nucleus	2.08737	72.4344	44.1594	14.3098	44.1594	5.46089	44.1594	Nucleotide sequence
degree	11.697	43.9289	59.198	14.4901	59.198	7.81368	43.9289	PPI network
distance	0.39637	35.7478	31.3421	8.96275	31.3421	2.96329	31.3421	Genomic
AAC_S	0	29.5935	41.8883	7.61675	41.8883	0.711038	29.5935	Protein sequence
CTDC_secondarystruct.Group1	4.59143	24.1571	64.5026	10.1013	64.5026	2.78472	24.1571	Protein sequence
variants_effect_3_prime_UTR_variant	0.349206	28.5332	41.3692	5.15843	41.3692	3.30227	28.5332	SNP data
TACC_Nucleosome.lag2	0	23.9762	47.109	8.8928	47.109	1.55197	23.9762	Nucleotide sequence
PseDNC_Xc1.TC	0.413669	24.5771	46.3452	6.47415	46.3452	0.178432	24.5771	Nucleotide sequence
Mitochondrion	10.5428	89.6288	15.4309	17.796	15.4309	6.58617	15.4309	Nucleotide sequence
exons_total_length	2.1114	17.7018	18.6521	13.1528	18.6521	2.28035	17.7018	Genomic
SNPS	0.968562	20.5664	36.5266	9.29551	36.5266	2.33499	20.5664	SNP data
gc_content	3.08037	12.7425	44.7355	14.3981	44.7355	4.02063	14.3981	Nucleotide sequence
Ribo.seq	3.41529	18.1821	40.3401	7.83732	40.3401	6.67101	18.1821	Ribo-seq
SignalP	0	46.8254	24.8771	0	24.8771	0.747046	24.8771	Signal peptide prediction
DC_VF	0.122033	21.3957	20.2641	3.58449	20.2641	1.08701	20.2641	Protein sequence
PseKNC_5_Xc1.TAG	0	22.0179	47.1611	1.55449	47.1611	0.293376	22.0179	Nucleotide sequence
CTriad_VS431	0.942279	17.1091	19.2941	5.46974	19.2941	0.716607	17.1091	Protein sequence
Geary_CIDH920105.lag2	0.161733	17.1546	33.1812	4.43123	33.1812	0.859494	17.1546	Protein sequence
CTriad_VS612	0.524418	14.3303	32.8493	5.50977	32.8493	0.107388	14.3303	Protein sequence
Geary_BHAR880101.lag2	1.10803	12.62	18.4914	7.0848	18.4914	0.209739	12.62	Protein sequence
CTriad_VS115	4.32853	3.34901	51.33	9.04482	51.33	10.2379	9.04482	Protein sequence
Geary_CHOC760101.lag7	0	17.4945	12.8154	6.17755	12.8154	0.12716	12.8154	Protein sequence
betweenness	0.0790855	10.7121	54.4692	7.55428	54.4692	0	10.7121	PPI network
ChIP_H3K27me3	0	35.1517	17.3456	0.0481232	17.3456	0.906001	17.3456	ChIP-seq
DC_DD	0	15.6796	12.0948	6.14914	12.0948	0.367193	12.0948	Protein sequence
APAAC_Pc2.Hydrophobicity.2	7.50316	0	35.281	9.02208	35.281	0.193914	9.02208	Protein sequence
CTriad_VS613	0.352449	11.5365	23.1241	4.93425	23.1241	0	11.5365	Protein sequence
CTriad_VS165	0.388001	10.8587	34.7614	5.35989	34.7614	0.11288	10.8587	Protein sequence
CTriad_VS433	0	17.2196	12.2638	3.72384	12.2638	0.092407	12.2638	Protein sequence
DC_IN	0	12.2074	14.8711	3.72579	14.8711	0.0786005	12.2074	Protein sequence
CTDD_prop5.G3.residue0	0.0509185	16.7681	7.71529	8.40904	7.71529	3.01424	7.71529	Protein sequence
kmer_3_GAT	0	8.71079	11.9063	6.58423	11.9063	0.846085	8.71079	Nucleotide sequence
DC_IV	0	10.8787	13.9276	4.25193	13.9276	0.573173	10.8787	Protein sequence
DC_KG	1.35809	8.14255	32.3629	5.38067	32.3629	0.131387	8.14255	Protein sequence
Moran_CHAM820102.lag7	0	8.65043	7.21999	6.1765	7.21999	0.265698	7.21999	Protein sequence
CTriad_VS563	0.177878	8.78138	22.2176	4.52737	22.2176	0.244117	8.78138	Protein sequence
CTDD_prop2.G2.residue50	0	7.10955	19.3482	6.17992	19.3482	0.319895	7.10955	Protein sequence
DC_RE	0.849575	6.67967	27.4121	6.60972	27.4121	0.758619	6.67967	Protein sequence
DC_MP	0.746947	15.1166	8.08084	5.00943	8.08084	1.10662	8.08084	Protein sequence
CTriad_VS153	0.475911	7.20576	37.5291	5.76713	37.5291	0	7.20576	Protein sequence
CTriad_VS463	0.342727	10.1168	8.18345	4.56595	8.18345	0.645519	8.18345	Protein sequence
Subcel3	0.232145	15.3227	9.04703	3.44051	9.04703	0	9.04703	Subcellular localisation prediction
CTriad_VS511	0.608068	7.07437	53.5298	5.12778	53.5298	0.0818449	7.07437	Protein sequence
CTriad_VS462	0.298064	6.99133	10.8414	5.15779	10.8414	0.180295	6.99133	Protein sequence
DC_MS	0	11.1266	7.08672	5.0464	7.08672	0.141766	7.08672	Protein sequence
CTDD_prop4.G2.residue25	1.15894	1.01756	26.0638	8.04596	26.0638	3.76795	8.04596	Protein sequence
PseKNC_5_Xc1.CGA	0.0834122	9.86217	41.1802	1.68794	41.1802	0.461822	9.86217	Nucleotide sequence
PAAC_Xc2.lambda.3	0.293783	3.89013	40.5111	7.43715	40.5111	0.221605	7.43715	Protein sequence
DC_LA	3.95631	0.365754	23.0849	7.34804	23.0849	0.308811	7.34804	Protein sequence
PseKNC_5_Xc1.GCT	0.0369581	8.53752	48.5078	2.54576	48.5078	0.254664	8.53752	Nucleotide sequence
DC_PD	0	13.5405	6.07588	4.29715	6.07588	0.151684	6.07588	Protein sequence
DC_HA	0.197777	5.78788	15.9353	4.07926	15.9353	0	5.78788	Protein sequence
CTDD_prop2.G2.residue0	7.75308	0	3.62232	11.3166	3.62232	6.10571	3.62232	Protein sequence
DC_YV	0	12.9797	6.86858	2.85708	6.86858	0.393822	6.86858	Protein sequence
DC_IQ	0	4.57034	6.5994	5.13573	6.5994	0.380304	5.13573	Protein sequence
DC_QM	0.419779	11.3388	4.83488	4.83768	4.83488	0.911387	4.83488	Protein sequence
PseKNC_3_Xc1.TCG	2.82309	4.69516	73.6383	4.16407	73.6383	0.903682	4.69516	Nucleotide sequence
PseKNC_3_Xc1.GTG	0	7.35918	6.66814	2.15938	6.66814	0	6.66814	Nucleotide sequence
kmer_3_GCT	1.0679	1.88195	32.3893	6.27482	32.3893	0.808503	6.27482	Nucleotide sequence
PAAC_Xc2.lambda.9	0.0406716	0	39.3864	7.45318	39.3864	0.61656	7.45318	Protein sequence
CTriad_VS125	0.205749	2.65754	39.116	4.65605	39.116	0.771673	4.65605	Protein sequence
DC_RL	0.200218	0.671701	28.4241	6.40984	28.4241	0.428119	6.40984	Protein sequence
PseKNC_5_Xc1.TCG	0.228174	3.04618	72.1296	2.57612	72.1296	3.44691	3.04618	Nucleotide sequence
PseKNC_5_Xc1.CGT	2.96712	1.08285	63.6784	3.02618	63.6784	0	3.02618	Nucleotide sequence
Moran_CIDH920105.lag2	0.0454518	0	33.0231	4.78055	33.0231	1.0621	4.78055	Protein sequence
CTDD_prop4.G2.residue0	1.80689	5.52461	2.69795	6.52729	2.69795	0.186023	2.69795	Protein sequence
PseKNC_3_Xc1.CGA	0.162152	1.92465	40.6794	2.43752	40.6794	0.0374234	2.43752	Nucleotide sequence
PseKNC_3_Xc1.ACG	0.214188	1.59168	50.3005	2.63112	50.3005	0	2.63112	Nucleotide sequence
PseKNC_3_Xc1.CCC	0	36.7951	1.09434	1.65411	1.09434	0	1.09434	Nucleotide sequence
G3s	0	43.5157	0	5.83943	0	0.469736	0	Nucleotide sequence

## Sheet: TableS2
Table S2. Select predictive features and importance for predictions within D. melanogaster using six ML models
Features that contribute most for discrimination between essential and non-essential genes within species in D. melanogaster were selected from a range of features available for both C. elegans and D. melanogaster.
Their relative importance determined by the machine learning models: Gradient Boosting Machines (GBM), Generalised Linear Models), Neural Networks (NN), Random Forest (RF), Support-Vector Machines and eXtreme Gradient Boosting Machines (XGB).
Feature	GBM	GLM	NN	RF	SVM	XGB	Median	Source
exons	67.084	100	94.7923	61.4245	94.7923	100	94.7923	Genomic
num_cells_expressed	100	25.0534	93.0528	100	93.0528	57.4861	93.0528	scRNA-seq
OMA_orthologs	39.5591	11.9555	100	63.5025	100	32.0141	51.5308	Orthologs: OMA database
EST_BLAT	31.9296	3.45473	99.3219	49.4721	99.3219	25.5271	40.7008	EST data
Membrane	6.93436	54.6585	49.9822	13.7351	49.9822	13.9974	31.9898	Subcellular localisation prediction
ChIP_H3K4me3	21.0272	28.5212	78.5772	14.3269	78.5772	21.3282	24.9247	ChIP-seq
gc_content	15.8289	18.1389	62.3623	20.9694	62.3623	7.74282	19.5542	Nucleotide sequence
C3s	17.9566	9.89986	62.5559	20.7859	62.5559	3.94481	19.3712	Nucleotide sequence
degree	8.85811	17.1958	51.499	18.46	51.499	5.9261	17.8279	PPI network
Nucleus	2.03466	16.8984	50.1651	12.9541	50.1651	0.603996	14.9262	Subcellular localisation prediction
Cytoplasm	3.75264	14.6007	60.9121	12.8751	60.9121	0	13.7379	Subcellular localisation prediction
DC_LA	11.7861	1.11639	30.7118	12.3309	30.7118	3.61223	12.0585	Protein sequence
DC_VF	0.283553	19.1385	19.4239	3.41581	19.4239	0.641325	11.2772	Protein sequence
CTDD_prop4.G2.residue25	6.15717	4.80477	32.4616	10.5188	32.4616	11.3994	10.9591	Protein sequence
Peroxisome	1.80384	10.848	32.1173	10.5966	32.1173	1.62268	10.7223	Subcellular localisation prediction
CTriad_VS613	0.919916	14.5684	22.5827	5.89632	22.5827	1.04541	10.2324	Protein sequence
APAAC_Pc2.Hydrophobicity.6	2.42043	11.4171	24.7665	8.14712	24.7665	0.831321	9.78212	Protein sequence
distance	0.980512	7.41719	21.1036	11.6822	21.1036	0.491179	9.54968	Genomic
Geary_CHAM810101.lag5	0.176855	13.2923	16.0329	5.41609	16.0329	1.15502	9.35421	Protein sequence
Ribo.seq	4.14092	13.4767	39.8774	4.44292	39.8774	3.28025	8.95981	Ribo-seq
ChIP_H3K27me3	0	41.469	16.9421	0	16.9421	0.710445	8.82627	ChIP-seq
Geary_BHAR880101.lag5	0.176288	12.875	23.5043	4.13439	23.5043	0.0683172	8.50468	Protein sequence
DC_AM	0.597299	12.6814	15.2009	4.01652	15.2009	0.299598	8.34897	Protein sequence
CTDD_prop6.G2.residue25	2.17153	9.19134	17.1197	7.39731	17.1197	0.700638	8.29433	Protein sequence
Moran_CHOC760101.lag7	0.284425	11.6438	17.739	4.81746	17.739	0.205133	8.23065	Protein sequence
exons_total_length	1.58506	6.5153	15.9463	9.91692	15.9463	0.700474	8.21611	Genomic
variants_effect_3_prime_UTR_variant	0.739894	10.5031	33.2748	5.40913	33.2748	0	7.95612	SNP data
PseKNC_3_Xc1.CCC	0.209058	16.6061	14.5859	1.26135	14.5859	0	7.92365	Nucleotide sequence
APAAC_Pc2.Hydrophobicity.3	0.0523569	8.82086	15.4872	6.88963	15.4872	0.146584	7.85525	Protein sequence
PseKNC_3_Xc1.CGT	0.905643	12.7299	67.5092	2.4466	67.5092	0.162839	7.58827	Nucleotide sequence
PseKNC_3_Xc1.GAC	0.262304	12.4649	56.1128	2.34941	56.1128	0	7.40717	Nucleotide sequence
DC_MP	0.492094	10.2409	15.2095	4.43492	15.2095	0.973411	7.33793	Protein sequence
Moran_CHAM820102.lag7	0.495294	8.28361	16.1114	6.05631	16.1114	0.673757	7.16996	Protein sequence
Moran_CHAM820102.lag8	0.18956	9.7506	8.09519	5.97016	8.09519	0.824926	7.03268	Protein sequence
DC_DL	0.486953	8.05413	10.6238	5.6217	10.6238	0.448684	6.83791	Protein sequence
DC_IA	0.390962	8.45696	21.4884	4.60825	21.4884	0.103627	6.53261	Protein sequence
TACC_Nucleosome.lag2	0.21418	8.26843	62.8161	4.75754	62.8161	0.368058	6.51298	Nucleotide sequence
CTriad_VS431	1.08924	7.37687	23.5408	5.36015	23.5408	0.817469	6.36851	Protein sequence
APAAC_Pc1.M	1.0938	5.41857	7.22641	7.54076	7.22641	1.38413	6.32249	Protein sequence
APAAC_Pc2.Hydrophobicity.2	4.89513	1.76755	34.2293	7.67875	34.2293	1.41511	6.28694	Protein sequence
AAC_A	0.885854	6.93471	61.4467	5.37071	61.4467	0.120611	6.15271	Protein sequence
DC_RD	0.0618144	6.87112	21.6855	5.33461	21.6855	0.418504	6.10286	Protein sequence
DC_ET	0.276761	8.86335	12.229	3.28018	12.229	0.228452	6.07177	Protein sequence
TMHMM	0	9.24886	34.547	0.438508	34.547	2.70464	5.97675	Transmembrane domains
Nc	2.56497	0.758585	62.8624	9.25035	62.8624	1.3252	5.90766	Nucleotide sequence
CTDD_prop4.G2.residue0	2.29573	4.41219	7.19321	9.52183	7.19321	0.30469	5.8027	Protein sequence
CTriad_VS624	0.202848	6.96065	15.6691	4.43796	15.6691	0	5.69931	Protein sequence
A3s	0.0873323	4.52613	64.3186	6.81564	64.3186	2.41246	5.67088	Nucleotide sequence
DC_DQ	0.411271	6.46663	6.91424	4.69946	6.91424	0.273544	5.58304	Protein sequence
CTriad_VS246	0.0864819	6.00603	13.5533	5.15984	13.5533	0.144418	5.58294	Protein sequence
PseKNC_3_Xc1.CGC	1.4901	7.32807	69.4778	3.72213	69.4778	1.0402	5.5251	Nucleotide sequence
CTriad_VS146	0	6.92454	20.5391	3.76477	20.5391	0.231717	5.34466	Protein sequence
DC_MS	1.0772	6.09808	15.1616	4.2195	15.1616	0.757157	5.15879	Protein sequence
PseKNC_5_Xc1.AAA	0	8.26159	49.4171	2.03285	49.4171	0.620647	5.14722	Nucleotide sequence
DC_TG	0.261511	4.90662	33.5041	5.33383	33.5041	0.0984433	5.12023	Protein sequence
DC_QQ	0.122514	6.04814	11.7554	4.1623	11.7554	0.214627	5.10522	Protein sequence
CTriad_VS415	0.0616181	5.46283	31.026	4.74019	31.026	0.431844	5.10151	Protein sequence
kmer_3_GCT	1.74373	0	36.2694	8.40914	36.2694	0.216962	5.07643	Nucleotide sequence
AAC_S	1.01694	2.91664	46.7339	7.09652	46.7339	0.262269	5.00658	Nucleotide sequence
Geary_CHAM810101.lag10	0.608713	3.74239	17.379	6.26204	17.379	0.300853	5.00221	Protein sequence
Moran_CHAM810101.lag8	0	5.55116	6.87734	4.40597	6.87734	0.272649	4.97856	Protein sequence
DC_AK	3.99251	2.44563	47.0663	5.77933	47.0663	0.114049	4.88592	Protein sequence
CTriad_VS661	1.38798	5.05314	24.7909	4.55883	24.7909	0.621751	4.80598	Protein sequence
DC_PM	0.257975	8.62322	4.68075	5.10125	4.68075	1.80773	4.68075	Protein sequence
CTDC_secondarystruct.Group1	1.65048	0.962351	60.3371	6.83958	60.3371	2.44162	4.6406	Protein sequence
CTriad_VS144	0.17018	5.23265	11.4537	3.57576	11.4537	0.26324	4.40421	Protein sequence
TACC_Nucleosome.lag1	1.44064	0	77.1112	7.22807	77.1112	1.08722	4.33435	Nucleotide sequence
AAC_Q	0.712378	0	18.3667	7.72135	18.3667	0.935157	4.32825	Protein sequence
Geary_CIDH920105.lag10	0.645571	0.980897	21.4894	7.31553	21.4894	0.360023	4.14821	Protein sequence
DC_AQ	0.17207	4.6012	29.4074	3.64118	29.4074	0.382415	4.12119	Protein sequence
PseKNC_3_Xc1.GCT	0.22907	6.65436	60.8821	1.58599	60.8821	0.205265	4.12017	Nucleotide sequence
DC_NK	0.208142	4.13949	19.1737	3.97142	19.1737	0	4.05546	Protein sequence
PseKNC_5_Xc1.GTC	0	6.3869	60.5171	1.68104	60.5171	0.732716	4.03397	Nucleotide sequence
DC_HA	2.24043	1.99549	22.8646	5.47577	22.8646	0	3.8581	Protein sequence
CTriad_VS524	0	2.65131	16.1958	4.6815	16.1958	0.190309	3.6664	Protein sequence
Geary_CIDH920105.lag6	0.424593	1.0506	35.2226	5.71732	35.2226	0.174495	3.38396	Protein sequence
Geary_CHOC760101.lag7	1.40291	0	19.0344	5.34245	19.0344	0.25444	3.37268	Protein sequence
PseKNC_5_Xc1.GCT	0	5.13534	58.7121	1.37728	58.7121	0	3.25631	Nucleotide sequence
PseKNC_5_Xc1.ACA	0.37773	7.50298	4.57951	1.89258	4.57951	0.133764	3.23605	Nucleotide sequence
CTriad_VS153	1.22044	1.67822	36.9002	4.44681	36.9002	0	3.06251	Protein sequence
CTriad_VS231	0	13.0938	2.58952	3.8342	2.58952	0.216281	2.58952	Protein sequence
Geary_CHAM810101.lag8	0	0	8.16909	4.46683	8.16909	0	2.23342	Protein sequence
Moran_BHAR880101.lag5	0.250782	0	25.6575	3.8443	25.6575	0.554093	2.19919	Protein sequence
PseKNC_5_Xc1.CGT	0.87024	0	66.5843	2.08315	66.5843	1.5352	1.80917	Nucleotide sequence
Mitochondrion	0.390331	19.3342	1.31513	9.56455	1.31513	1.05601	1.31513	Subcellular localisation prediction
Extracellular	0	23.4117	0	3.86182	0	1.33485	0.667424	Subcellular localisation prediction
DC_QI	0	8.4222	0.606118	3.77999	0.606118	0	0.606118	Protein sequence
CTriad_VS234	0	5.62466	0.455035	5.90294	0.455035	0.0730255	0.455035	Protein sequence

## Sheet: TableS3
Table S3. Ranked cross-species essentiality probabilities for C. elegans genes
An eXtreme Gradient Boosting (XGB) machine learning model was trained with the genes and best-predictive features identified for D. melanogaster, and then used to predict essentiality for C. elegans genes.
Gene ID	Probability	Normalised (0-1)
WBGene00004453	0.626491	1
WBGene00020423	0.613753	0.979664
WBGene00003928	0.60088	0.959113
WBGene00003926	0.594808	0.94942
WBGene00000366	0.594586	0.949065
WBGene00003230	0.59293	0.946422
WBGene00003927	0.58931	0.940642
WBGene00001881	0.588482	0.939321
WBGene00003392	0.581961	0.92891
WBGene00004014	0.576021	0.919427
WBGene00004505	0.574782	0.917449
WBGene00000915	0.573619	0.915594
WBGene00004271	0.573313	0.915104
WBGene00004297	0.572715	0.91415
WBGene00001876	0.570746	0.911007
WBGene00004486	0.568959	0.908153
WBGene00000833	0.566897	0.904863
WBGene00003155	0.565841	0.903176
WBGene00002045	0.565717	0.902978
WBGene00000206	0.564764	0.901457
WBGene00004447	0.564483	0.901008
WBGene00004502	0.564205	0.900564
WBGene00001890	0.564041	0.900302
WBGene00004506	0.563277	0.899084
WBGene00006917	0.56296	0.898577
WBGene00004467	0.561803	0.896729
WBGene00004449	0.561635	0.896461
WBGene00007000	0.560099	0.89401
WBGene00004448	0.557419	0.88973
WBGene00001895	0.55642	0.888136
WBGene00001925	0.55642	0.888136
WBGene00004414	0.553003	0.882681
WBGene00002196	0.552712	0.882217
WBGene00000041	0.552388	0.8817
WBGene00004436	0.548842	0.876038
WBGene00004460	0.548407	0.875344
WBGene00001886	0.547136	0.873316
WBGene00001917	0.547136	0.873316
WBGene00001877	0.546227	0.871863
WBGene00004450	0.545736	0.87108
WBGene00007013	0.541289	0.86398
WBGene00004188	0.541097	0.863674
WBGene00004302	0.540065	0.862026
WBGene00001893	0.538389	0.859351
WBGene00004451	0.53829	0.859193
WBGene00001088	0.536544	0.856405
WBGene00004483	0.536188	0.855838
WBGene00004754	0.535953	0.855463
WBGene00004484	0.535294	0.85441
WBGene00001209	0.53498	0.853909
WBGene00002001	0.533436	0.851444
WBGene00004482	0.532107	0.849323
WBGene00004489	0.531563	0.848453
WBGene00001094	0.531407	0.848205
WBGene00004469	0.529335	0.844897
WBGene00002363	0.526903	0.841014
WBGene00001005	0.526527	0.840415
WBGene00000378	0.526398	0.840209
WBGene00004496	0.526301	0.840053
WBGene00000207	0.526245	0.839963
WBGene00004471	0.525814	0.839276
WBGene00003901	0.524951	0.837898
WBGene00001904	0.523668	0.83585
WBGene00009812	0.522504	0.833991
WBGene00000182	0.522412	0.833845
WBGene00004504	0.522023	0.833224
WBGene00004492	0.521695	0.8327
WBGene00001932	0.521157	0.831841
WBGene00002083	0.520317	0.830501
WBGene00004435	0.520243	0.830382
WBGene00004419	0.519932	0.829886
WBGene00004474	0.519782	0.829646
WBGene00001940	0.519305	0.828885
WBGene00004463	0.518506	0.827609
WBGene00003818	0.518007	0.826812
WBGene00004430	0.517344	0.825755
WBGene00002079	0.517213	0.825546
WBGene00003157	0.516268	0.824036
WBGene00001226	0.515987	0.823588
WBGene00000379	0.515949	0.823528
WBGene00004916	0.51552	0.822842
WBGene00000377	0.514671	0.821487
WBGene00002065	0.514166	0.82068
WBGene00004429	0.514023	0.820453
WBGene00004415	0.512637	0.818241
WBGene00004417	0.512568	0.818129
WBGene00020507	0.511924	0.817101
WBGene00001744	0.511633	0.816638
WBGene00003159	0.511429	0.816312
WBGene00006728	0.510067	0.814137
WBGene00001227	0.510063	0.814131
WBGene00003806	0.509587	0.813371
WBGene00003831	0.509337	0.812972
WBGene00000380	0.508974	0.812393
WBGene00004181	0.508967	0.812381
WBGene00001930	0.508517	0.811663
WBGene00003924	0.507379	0.809845
WBGene00004416	0.507318	0.809749
WBGene00000230	0.507142	0.809467
WBGene00002879	0.504823	0.805766
WBGene00004454	0.504491	0.805236
WBGene00000774	0.504163	0.804712
WBGene00001909	0.503632	0.803864
WBGene00001167	0.503136	0.803073
WBGene00004464	0.503044	0.802926
WBGene00005663	0.501976	0.801221
WBGene00004472	0.500748	0.79926
WBGene00003158	0.500504	0.798871
WBGene00004274	0.500121	0.79826
WBGene00001906	0.499563	0.797368
WBGene00001903	0.49923	0.796837
WBGene00003073	0.498673	0.795947
WBGene00004475	0.498017	0.7949
WBGene00001908	0.497952	0.794797
WBGene00003393	0.497673	0.79435
WBGene00010785	0.497188	0.793577
WBGene00001918	0.496655	0.792725
WBGene00006529	0.495636	0.791099
WBGene00000868	0.49204	0.785359
WBGene00004413	0.491293	0.784165
WBGene00004459	0.491249	0.784095
WBGene00001889	0.491231	0.784067
WBGene00004485	0.490818	0.783408
WBGene00003925	0.490725	0.78326
WBGene00004439	0.490409	0.782755
WBGene00000197	0.489984	0.782076
WBGene00003815	0.489746	0.781696
WBGene00001018	0.489539	0.781366
WBGene00003953	0.488967	0.780453
WBGene00001901	0.488523	0.779744
WBGene00001939	0.488411	0.779564
WBGene00004479	0.488374	0.779505
WBGene00003920	0.488126	0.779109
WBGene00001891	0.48789	0.778733
WBGene00004497	0.487785	0.778565
WBGene00006773	0.487421	0.777984
WBGene00003949	0.487204	0.777637
WBGene00003162	0.485756	0.775326
WBGene00004136	0.485482	0.774888
WBGene00004495	0.485127	0.774322
WBGene00006911	0.484898	0.773956
WBGene00000381	0.484027	0.772566
WBGene00009992	0.483752	0.772128
WBGene00003154	0.483699	0.772042
WBGene00002076	0.483364	0.771507
WBGene00001423	0.48291	0.770783
WBGene00004775	0.481905	0.769179
WBGene00000836	0.481607	0.768702
WBGene00004755	0.481476	0.768494
WBGene00002025	0.481374	0.76833
WBGene00003036	0.480783	0.767388
WBGene00000229	0.479486	0.765316
WBGene00004723	0.478982	0.764513
WBGene00000160	0.478243	0.763332
WBGene00003931	0.478027	0.762987
WBGene00008645	0.477891	0.76277
WBGene00006699	0.476938	0.761249
WBGene00001927	0.476241	0.760136
WBGene00009187	0.473314	0.755464
WBGene00020950	0.472967	0.75491
WBGene00002229	0.472807	0.754654
WBGene00004392	0.472684	0.754457
WBGene00004476	0.472527	0.754207
WBGene00007027	0.470877	0.751574
WBGene00004491	0.470671	0.751245
WBGene00001938	0.470336	0.75071
WBGene00006481	0.46937	0.749167
WBGene00006936	0.469263	0.748996
WBGene00001229	0.467902	0.746825
WBGene00004503	0.467284	0.745837
WBGene00003904	0.467282	0.745833
WBGene00001921	0.467225	0.745743
WBGene00004888	0.467037	0.745443
WBGene00004425	0.466968	0.745333
WBGene00003123	0.465893	0.743617
WBGene00000183	0.465728	0.743353
WBGene00002238	0.465005	0.742199
WBGene00004423	0.464353	0.741158
WBGene00003777	0.463918	0.740464
WBGene00004340	0.463831	0.740325
WBGene00008546	0.463793	0.740264
WBGene00006565	0.462903	0.738844
WBGene00004420	0.462294	0.737871
WBGene00004473	0.461976	0.737363
WBGene00010556	0.461873	0.7372
WBGene00004478	0.461856	0.737171
WBGene00004042	0.461527	0.736647
WBGene00000962	0.461401	0.736445
WBGene00000371	0.460138	0.73443
WBGene00003947	0.459995	0.7342
WBGene00001942	0.459907	0.73406
WBGene00001225	0.459334	0.733146
WBGene00001880	0.459207	0.732942
WBGene00001498	0.457687	0.730516
WBGene00009004	0.457648	0.730453
WBGene00004189	0.456208	0.728155
WBGene00003080	0.456189	0.728124
WBGene00004187	0.455345	0.726778
WBGene00002005	0.454906	0.726077
WBGene00011111	0.454604	0.725595
WBGene00006996	0.454243	0.725017
WBGene00008053	0.454048	0.724707
WBGene00022021	0.452463	0.722177
WBGene00002152	0.452385	0.722052
WBGene00001007	0.45185	0.721197
WBGene00004432	0.451553	0.720724
WBGene00001030	0.451474	0.720598
WBGene00004304	0.450761	0.71946
WBGene00006919	0.449743	0.717834
WBGene00001920	0.447759	0.714667
WBGene00001336	0.447324	0.713973
WBGene00003156	0.446994	0.713446
WBGene00009246	0.444887	0.710082
WBGene00001102	0.443049	0.707148
WBGene00001935	0.442392	0.706099
WBGene00004465	0.44106	0.703972
WBGene00001928	0.439316	0.701188
WBGene00004490	0.438953	0.700609
WBGene00006921	0.438441	0.699792
WBGene00006840	0.437911	0.698945
WBGene00004807	0.436471	0.696647
WBGene00004458	0.434972	0.694254
WBGene00002845	0.43476	0.693915
WBGene00003788	0.43317	0.691376
WBGene00004806	0.43255	0.690386
WBGene00003002	0.431013	0.687933
WBGene00002226	0.430913	0.687773
WBGene00001882	0.429577	0.68564
WBGene00001006	0.428793	0.684389
WBGene00002261	0.428678	0.684206
WBGene00010304	0.428029	0.683169
WBGene00003950	0.426727	0.681091
WBGene00009368	0.425928	0.679816
WBGene00004389	0.424026	0.67678
WBGene00004919	0.423989	0.676719
WBGene00010809	0.423954	0.676665
WBGene00001303	0.423763	0.676359
WBGene00003132	0.42025	0.670751
WBGene00004953	0.419651	0.669795
WBGene00002994	0.419295	0.669227
WBGene00000390	0.417313	0.666063
WBGene00001259	0.416847	0.665319
WBGene00000199	0.416394	0.664595
WBGene00007184	0.415433	0.663061
WBGene00003081	0.414808	0.662064
WBGene00004374	0.411879	0.657387
WBGene00006727	0.411871	0.657374
WBGene00000869	0.411744	0.657172
WBGene00001574	0.411385	0.656599
WBGene00010665	0.411106	0.656154
WBGene00020391	0.410467	0.655133
WBGene00000158	0.410061	0.654485
WBGene00006737	0.40886	0.652568
WBGene00004498	0.407776	0.650837
WBGene00001885	0.407459	0.650332
WBGene00002000	0.407351	0.650159
WBGene00020687	0.406894	0.64943
WBGene00001231	0.406469	0.648751
WBGene00001082	0.405935	0.647898
WBGene00000064	0.405876	0.647804
WBGene00004952	0.405605	0.647372
WBGene00001974	0.403662	0.64427
WBGene00007028	0.402578	0.642538
WBGene00006810	0.40074	0.639605
WBGene00006920	0.399933	0.638317
WBGene00009664	0.398551	0.636109
WBGene00001028	0.398348	0.635786
WBGene00003922	0.398305	0.635718
WBGene00001017	0.397222	0.633989
WBGene00002075	0.39646	0.632772
WBGene00004679	0.396398	0.632673
WBGene00000098	0.396259	0.632451
WBGene00003799	0.395828	0.631762
WBGene00001683	0.394461	0.62958
WBGene00004738	0.393571	0.628161
WBGene00001497	0.392981	0.627218
WBGene00001568	0.392647	0.626684
WBGene00001427	0.390011	0.622477
WBGene00004873	0.38994	0.622363
WBGene00004443	0.389934	0.622354
WBGene00003415	0.389898	0.622296
WBGene00004445	0.385783	0.615727
WBGene00006617	0.385742	0.615661
WBGene00001894	0.38544	0.615179
WBGene00002047	0.385009	0.614491
WBGene00002957	0.384962	0.614416
WBGene00000549	0.383542	0.612149
WBGene00001834	0.383004	0.61129
WBGene00001228	0.382494	0.610477
WBGene00008920	0.381621	0.609082
WBGene00001340	0.381569	0.609
WBGene00004434	0.38107	0.608202
WBGene00007433	0.381043	0.60816
WBGene00001999	0.380792	0.60776
WBGene00001978	0.380777	0.607736
WBGene00003052	0.380367	0.607081
WBGene00000063	0.379676	0.605978
WBGene00009092	0.379185	0.605194
WBGene00001914	0.378578	0.604225
WBGene00019061	0.378559	0.604195
WBGene00002632	0.378197	0.603616
WBGene00001907	0.377716	0.602849
WBGene00003210	0.377599	0.602662
WBGene00006910	0.377552	0.602587
WBGene00000066	0.377035	0.601761
WBGene00020915	0.376094	0.600258
WBGene00004101	0.37605	0.600188
WBGene00003951	0.375013	0.598533
WBGene00006537	0.373245	0.595711
WBGene00000550	0.37204	0.593787
WBGene00004955	0.372011	0.593741
WBGene00004305	0.371585	0.59306
WBGene00008682	0.371366	0.592711
WBGene00010260	0.371311	0.592624
WBGene00002064	0.369574	0.589851
WBGene00003209	0.369252	0.589337
WBGene00000293	0.36925	0.589333
WBGene00000443	0.368887	0.588753
WBGene00003079	0.368703	0.58846
WBGene00004488	0.368444	0.588046
WBGene00003009	0.368275	0.587776
WBGene00001016	0.368026	0.58738
WBGene00008136	0.363559	0.580249
WBGene00000235	0.361044	0.576234
WBGene00000876	0.360863	0.575944
WBGene00020269	0.358734	0.572544
WBGene00021004	0.358048	0.571449
WBGene00012015	0.357803	0.571058
WBGene00008140	0.357798	0.571051
WBGene00005015	0.357158	0.570029
WBGene00001793	0.356486	0.568957
WBGene00010428	0.356323	0.568696
WBGene00001937	0.356158	0.568433
WBGene00006700	0.355723	0.567738
WBGene00006373	0.354099	0.565145
WBGene00000872	0.352901	0.563233
WBGene00006733	0.352626	0.562794
WBGene00022089	0.350499	0.559399
WBGene00003794	0.350383	0.559213
WBGene00022029	0.350374	0.559199
WBGene00001230	0.34789	0.555233
WBGene00001130	0.3471	0.553972
WBGene00008166	0.346649	0.553253
WBGene00003795	0.345637	0.551637
WBGene00006940	0.345488	0.551398
WBGene00010405	0.344887	0.550439
WBGene00008345	0.344791	0.550286
WBGene00001945	0.344664	0.550084
WBGene00006307	0.344392	0.549649
WBGene00001333	0.343725	0.548584
WBGene00001679	0.343623	0.548421
WBGene00004166	0.342908	0.54728
WBGene00004984	0.341729	0.545397
WBGene00003061	0.341335	0.544769
WBGene00017075	0.34079	0.543898
WBGene00002583	0.340384	0.543251
WBGene00000942	0.339986	0.542615
WBGene00000092	0.337598	0.538804
WBGene00022042	0.336918	0.537717
WBGene00003048	0.336562	0.537149
WBGene00002297	0.336522	0.537085
WBGene00001089	0.334458	0.53379
WBGene00006913	0.333167	0.53173
WBGene00001830	0.332379	0.530472
WBGene00003596	0.331648	0.529305
WBGene00001923	0.331453	0.528993
WBGene00010097	0.331146	0.528504
WBGene00006889	0.330658	0.527723
WBGene00000405	0.330311	0.52717
WBGene00001936	0.330059	0.526768
WBGene00000409	0.329517	0.525902
WBGene00004915	0.329145	0.525309
WBGene00003130	0.329139	0.525299
WBGene00001511	0.328965	0.525021
WBGene00006707	0.327666	0.522948
WBGene00020549	0.326425	0.520967
WBGene00001215	0.326364	0.520869
WBGene00004880	0.326131	0.520496
WBGene00001513	0.325282	0.519141
WBGene00008857	0.325202	0.519013
WBGene00004391	0.324516	0.517919
WBGene00004477	0.323659	0.516551
WBGene00010911	0.323149	0.515737
WBGene00001502	0.322274	0.514339
WBGene00002344	0.321191	0.512611
WBGene00004874	0.319268	0.509541
WBGene00004343	0.317882	0.507329
WBGene00004341	0.317862	0.507296
WBGene00001878	0.316062	0.504422
WBGene00003229	0.315969	0.504274
WBGene00020999	0.315946	0.504238
WBGene00003789	0.31534	0.50327
WBGene00000292	0.314433	0.501821
WBGene00001686	0.314232	0.5015
WBGene00006386	0.314155	0.501377
WBGene00003390	0.313619	0.500522
WBGene00004016	0.312193	0.498245
WBGene00003916	0.312121	0.49813
WBGene00001808	0.312054	0.498023
WBGene00004920	0.31071	0.495879
WBGene00006918	0.310377	0.495346
WBGene00004422	0.308988	0.49313
WBGene00022046	0.307524	0.490792
WBGene00000110	0.307139	0.490178
WBGene00006572	0.306704	0.489484
WBGene00000970	0.306164	0.488621
WBGene00004480	0.305997	0.488354
WBGene00001166	0.305004	0.486768
WBGene00000410	0.304888	0.486583
WBGene00002717	0.304544	0.486035
WBGene00000554	0.303914	0.485029
WBGene00001829	0.303087	0.483709
WBGene00004085	0.302948	0.483487
WBGene00006515	0.301664	0.481436
WBGene00004456	0.300971	0.48033
WBGene00010333	0.300318	0.479288
WBGene00009661	0.298945	0.477097
WBGene00001051	0.298836	0.476922
WBGene00004808	0.298789	0.476848
WBGene00006702	0.298627	0.476589
WBGene00001926	0.298376	0.476188
WBGene00000875	0.298204	0.475913
WBGene00004239	0.29805	0.475667
WBGene00003791	0.297423	0.474667
WBGene00006933	0.297046	0.474065
WBGene00004433	0.296992	0.473978
WBGene00006439	0.296521	0.473226
WBGene00000200	0.29573	0.471964
WBGene00004428	0.293493	0.468393
WBGene00004426	0.293294	0.468075
WBGene00002231	0.293045	0.467678
WBGene00004409	0.292839	0.467348
WBGene00006573	0.292731	0.467176
WBGene00005022	0.290855	0.464182
WBGene00001335	0.290091	0.462962
WBGene00006518	0.289591	0.462163
WBGene00002202	0.289405	0.461867
WBGene00004418	0.288966	0.461166
WBGene00004421	0.287596	0.458978
WBGene00004914	0.287042	0.458094
WBGene00004268	0.286917	0.457895
WBGene00004312	0.286391	0.457055
WBGene00004315	0.286251	0.456832
WBGene00004034	0.285754	0.456038
WBGene00001580	0.285395	0.455465
WBGene00004705	0.285208	0.455167
WBGene00020022	0.284692	0.454343
WBGene00006379	0.284352	0.453799
WBGene00001941	0.284152	0.45348
WBGene00003030	0.283339	0.452182
WBGene00001919	0.281566	0.449351
WBGene00001922	0.281239	0.448831
WBGene00000814	0.280421	0.447524
WBGene00000275	0.280048	0.446929
WBGene00007053	0.27881	0.444953
WBGene00006512	0.278435	0.444354
WBGene00002046	0.278163	0.44392
WBGene00006648	0.278108	0.443831
WBGene00007009	0.277171	0.442336
WBGene00000502	0.276749	0.441662
WBGene00003071	0.276369	0.441056
WBGene00003826	0.276334	0.440999
WBGene00006945	0.276333	0.440997
WBGene00004726	0.275882	0.440278
WBGene00001912	0.27569	0.439972
WBGene00002073	0.275405	0.439516
WBGene00003047	0.274377	0.437875
WBGene00001883	0.274368	0.437861
WBGene00003797	0.273864	0.437057
WBGene00000231	0.272031	0.434131
WBGene00008549	0.271843	0.43383
WBGene00007016	0.271503	0.433287
WBGene00009266	0.271487	0.433261
WBGene00001262	0.271012	0.432504
WBGene00009122	0.269407	0.429941
WBGene00001979	0.268989	0.429274
WBGene00001946	0.268777	0.428936
WBGene00020636	0.268704	0.428819
WBGene00006540	0.267965	0.427639
WBGene00001281	0.26533	0.423433
WBGene00010015	0.264163	0.42157
WBGene00004091	0.263951	0.421231
WBGene00009082	0.26326	0.420128
WBGene00007686	0.261439	0.417221
WBGene00006876	0.261096	0.416673
WBGene00003077	0.261079	0.416646
WBGene00003559	0.261066	0.416625
WBGene00001931	0.26079	0.416184
WBGene00002985	0.259896	0.414757
WBGene00006523	0.259853	0.414688
WBGene00006538	0.259432	0.414017
WBGene00000566	0.259367	0.413913
WBGene00003076	0.259004	0.413334
WBGene00007620	0.257155	0.410382
WBGene00006964	0.256766	0.40976
WBGene00004357	0.256367	0.409125
WBGene00006768	0.256266	0.408962
WBGene00000496	0.256046	0.408611
WBGene00004027	0.255289	0.407404
WBGene00000263	0.254987	0.406921
WBGene00000498	0.254834	0.406677
WBGene00020275	0.254391	0.405969
WBGene00004756	0.254354	0.405909
WBGene00006474	0.253835	0.405082
WBGene00004390	0.253616	0.404731
WBGene00003241	0.253563	0.404648
WBGene00001566	0.252896	0.403583
WBGene00009477	0.25272	0.403301
WBGene00009103	0.251683	0.401646
WBGene00006342	0.250973	0.400513
WBGene00006961	0.250928	0.400441
WBGene00002068	0.25089	0.400381
WBGene00022121	0.250575	0.399877
WBGene00002497	0.250403	0.399603
WBGene00001915	0.249997	0.398955
WBGene00006817	0.249804	0.398647
WBGene00001899	0.249489	0.398143
WBGene00020868	0.249386	0.397979
WBGene00020683	0.248016	0.395791
WBGene00003651	0.247974	0.395725
WBGene00006381	0.247846	0.395521
WBGene00004339	0.246887	0.393989
WBGene00004208	0.246386	0.39319
WBGene00002245	0.246376	0.393173
WBGene00006579	0.245346	0.391529
WBGene00002169	0.244758	0.390591
WBGene00003214	0.244713	0.39052
WBGene00002247	0.244086	0.389518
WBGene00000159	0.243516	0.388608
WBGene00007576	0.24322	0.388135
WBGene00010609	0.242939	0.387687
WBGene00006410	0.242902	0.387628
WBGene00008262	0.242689	0.387287
WBGene00004303	0.242554	0.387072
WBGene00009342	0.242006	0.386197
WBGene00005077	0.24107	0.384703
WBGene00000228	0.240297	0.383469
WBGene00004765	0.239956	0.382924
WBGene00001235	0.239906	0.382845
WBGene00003074	0.239723	0.382552
WBGene00001896	0.239604	0.382362
WBGene00010094	0.23901	0.381415
WBGene00010912	0.238864	0.381182
WBGene00020437	0.238664	0.380863
WBGene00009701	0.238183	0.380095
WBGene00001911	0.235109	0.375187
WBGene00020181	0.234925	0.374894
WBGene00020097	0.234793	0.374682
WBGene00000142	0.234338	0.373957
WBGene00001929	0.234329	0.373941
WBGene00020107	0.233097	0.371975
WBGene00002027	0.232545	0.371094
WBGene00007010	0.231473	0.369382
WBGene00009654	0.231059	0.368722
WBGene00004015	0.231049	0.368706
WBGene00007059	0.230961	0.368565
WBGene00009364	0.230269	0.36746
WBGene00000585	0.229492	0.36622
WBGene00003184	0.228494	0.364626
WBGene00004798	0.228202	0.364161
WBGene00000923	0.227841	0.363585
WBGene00020112	0.22758	0.363168
WBGene00004055	0.227512	0.363058
WBGene00003982	0.227047	0.362317
WBGene00003395	0.225982	0.360616
WBGene00013038	0.225349	0.359605
WBGene00000994	0.224767	0.358676
WBGene00000879	0.22452	0.358282
WBGene00007555	0.224177	0.357735
WBGene00004887	0.223871	0.357246
WBGene00000938	0.221712	0.353799
WBGene00001337	0.221636	0.353678
WBGene00009314	0.220814	0.352366
WBGene00001595	0.220777	0.352308
WBGene00000449	0.220304	0.351553
WBGene00000883	0.220087	0.351205
WBGene00020517	0.219881	0.350876
WBGene00000192	0.219628	0.350472
WBGene00003062	0.219468	0.350217
WBGene00001833	0.21791	0.34773
WBGene00009881	0.217469	0.347026
WBGene00010713	0.216747	0.345874
WBGene00003834	0.215946	0.344594
WBGene00004090	0.215839	0.344423
WBGene00017088	0.215763	0.344303
WBGene00004217	0.21566	0.344138
WBGene00001561	0.215243	0.343473
WBGene00009980	0.213897	0.341324
WBGene00009051	0.21306	0.339987
WBGene00044072	0.21289	0.339716
WBGene00020696	0.212395	0.338926
WBGene00004951	0.211335	0.337233
WBGene00004320	0.211267	0.337125
WBGene00004706	0.211224	0.337056
WBGene00008878	0.210983	0.336671
WBGene00006516	0.210819	0.336411
WBGene00007029	0.210763	0.33632
WBGene00006497	0.210632	0.336112
WBGene00000890	0.210479	0.335867
WBGene00000203	0.20998	0.33507
WBGene00007444	0.209964	0.335045
WBGene00007703	0.208849	0.333264
WBGene00007008	0.207954	0.331836
WBGene00006568	0.207779	0.331556
WBGene00007711	0.207642	0.331338
WBGene00007050	0.207222	0.330667
WBGene00004013	0.205235	0.327495
WBGene00010941	0.205144	0.327351
WBGene00009542	0.204694	0.326632
WBGene00010988	0.20386	0.325299
WBGene00009162	0.203772	0.32516
WBGene00003793	0.203684	0.32502
WBGene00001905	0.203613	0.324906
WBGene00006647	0.203262	0.324345
WBGene00000248	0.203004	0.323933
WBGene00004387	0.202081	0.32246
WBGene00000991	0.20204	0.322395
WBGene00000276	0.200836	0.320473
WBGene00004273	0.200567	0.320043
WBGene00003064	0.200392	0.319764
WBGene00007192	0.200028	0.319183
WBGene00001526	0.200025	0.319178
WBGene00001330	0.199891	0.318964
WBGene00001045	0.199727	0.318703
WBGene00003989	0.199634	0.318553
WBGene00008408	0.199616	0.318525
WBGene00000532	0.198641	0.316969
WBGene00008218	0.198546	0.316816
WBGene00003893	0.198409	0.316599
WBGene00002262	0.19767	0.315418
WBGene00009012	0.196932	0.31424
WBGene00009264	0.196925	0.314229
WBGene00000156	0.196715	0.313894
WBGene00022122	0.196484	0.313526
WBGene00000465	0.196475	0.313511
WBGene00004388	0.195692	0.31226
WBGene00001579	0.195663	0.312214
WBGene00000874	0.195341	0.3117
WBGene00004895	0.195145	0.311387
WBGene00006730	0.194703	0.310681
WBGene00003805	0.194444	0.310269
WBGene00001879	0.194215	0.309903
WBGene00010204	0.194091	0.309704
WBGene00008506	0.193852	0.309323
WBGene00007024	0.192455	0.307093
WBGene00004891	0.192089	0.306509
WBGene00006530	0.191297	0.305244
WBGene00004781	0.191131	0.30498
WBGene00003622	0.190871	0.304564
WBGene00006776	0.19086	0.304547
WBGene00001972	0.19045	0.303893
WBGene00001095	0.190285	0.303629
WBGene00010419	0.190118	0.303362
WBGene00000886	0.19002	0.303206
WBGene00008564	0.189379	0.302183
WBGene00001236	0.189295	0.302048
WBGene00009353	0.189279	0.302022
WBGene00009587	0.188109	0.300155
WBGene00003796	0.18805	0.30006
WBGene00004214	0.187042	0.298451
WBGene00003218	0.186792	0.298052
WBGene00007137	0.186434	0.297481
WBGene00000773	0.18513	0.2954
WBGene00004378	0.184977	0.295154
WBGene00004203	0.184412	0.294254
WBGene00010197	0.18418	0.293882
WBGene00007332	0.183954	0.293522
WBGene00008750	0.183944	0.293506
WBGene00006826	0.18394	0.293499
WBGene00010054	0.183325	0.292517
WBGene00003921	0.183252	0.292401
WBGene00001892	0.182446	0.291115
WBGene00020334	0.180993	0.288795
WBGene00000205	0.180676	0.288288
WBGene00003066	0.180169	0.28748
WBGene00000411	0.180147	0.287444
WBGene00006603	0.179765	0.286834
WBGene00009993	0.179666	0.286676
WBGene00004204	0.179539	0.286474
WBGene00001002	0.179373	0.286209
WBGene00010037	0.179355	0.286179
WBGene00000464	0.178289	0.284479
WBGene00010130	0.178045	0.284089
WBGene00004782	0.177482	0.283189
WBGene00001081	0.177466	0.283165
WBGene00004494	0.177147	0.282656
WBGene00022044	0.177088	0.282561
WBGene00002041	0.176865	0.282204
WBGene00001900	0.175823	0.280541
WBGene00006839	0.175809	0.280518
WBGene00004259	0.175732	0.280397
WBGene00003231	0.175558	0.280118
WBGene00003161	0.174921	0.279101
WBGene00000298	0.174904	0.279074
WBGene00000123	0.174127	0.277833
WBGene00006803	0.173802	0.277314
WBGene00000150	0.173801	0.277313
WBGene00004437	0.173734	0.277206
WBGene00003401	0.173441	0.276739
WBGene00007709	0.173074	0.276153
WBGene00006577	0.173036	0.276092
WBGene00000184	0.17293	0.275923
WBGene00000157	0.17276	0.275652
WBGene00001661	0.172688	0.275536
WBGene00000817	0.172642	0.275463
WBGene00000973	0.172596	0.275389
WBGene00006442	0.17212	0.274629
WBGene00001662	0.171608	0.273812
WBGene00009441	0.171322	0.273355
WBGene00007564	0.170696	0.272356
WBGene00011015	0.170197	0.271559
WBGene00001875	0.169153	0.269893
WBGene00001431	0.169141	0.269874
WBGene00004078	0.168896	0.269483
WBGene00010351	0.168529	0.268897
WBGene00004318	0.168328	0.268576
WBGene00004441	0.168197	0.268367
WBGene00010035	0.168051	0.268133
WBGene00006781	0.167833	0.267785
WBGene00000507	0.166812	0.266156
WBGene00006935	0.166366	0.265444
WBGene00006968	0.166312	0.265358
WBGene00002040	0.166055	0.264948
WBGene00004076	0.165717	0.264408
WBGene00001648	0.165494	0.264052
WBGene00009554	0.164797	0.262939
WBGene00000067	0.164763	0.262885
WBGene00008452	0.164705	0.262793
WBGene00003914	0.164623	0.262662
WBGene00006311	0.164485	0.262441
WBGene00002078	0.164474	0.262424
WBGene00009305	0.163425	0.260749
WBGene00009188	0.163307	0.26056
WBGene00002228	0.163144	0.2603
WBGene00009126	0.162978	0.260035
WBGene00004438	0.162191	0.258779
WBGene00000209	0.161164	0.257139
WBGene00009330	0.160436	0.255978
WBGene00000115	0.160349	0.255838
WBGene00007880	0.160083	0.255414
WBGene00009006	0.159496	0.254476
WBGene00003930	0.159348	0.25424
WBGene00003243	0.158646	0.253119
WBGene00006997	0.158223	0.252443
WBGene00002889	0.157901	0.25193
WBGene00007587	0.157017	0.25052
WBGene00004823	0.15697	0.250444
WBGene00006887	0.155404	0.247943
WBGene00006461	0.155068	0.247407
WBGene00001934	0.155066	0.247404
WBGene00009688	0.154437	0.246401
WBGene00011051	0.153964	0.245646
WBGene00001249	0.15381	0.245399
WBGene00000865	0.153625	0.245104
WBGene00004314	0.153573	0.24502
WBGene00002184	0.153431	0.244793
WBGene00010406	0.153311	0.244603
WBGene00006829	0.153145	0.244337
WBGene00018008	0.152537	0.243367
WBGene00006467	0.152294	0.242979
WBGene00001902	0.152007	0.242521
WBGene00001688	0.150857	0.240686
WBGene00008386	0.150427	0.239998
WBGene00009553	0.150416	0.239981
WBGene00003996	0.15029	0.23978
WBGene00007974	0.149806	0.239008
WBGene00006709	0.149688	0.238819
WBGene00004117	0.149649	0.238757
WBGene00004040	0.149631	0.238728
WBGene00006423	0.148927	0.237603
WBGene00005010	0.148575	0.237042
WBGene00004186	0.148185	0.23642
WBGene00007017	0.14726	0.234943
WBGene00001284	0.147135	0.234742
WBGene00003911	0.146865	0.234312
WBGene00044083	0.146539	0.233791
WBGene00008143	0.14644	0.233633
WBGene00018007	0.146433	0.233622
WBGene00007488	0.146031	0.23298
WBGene00022092	0.145201	0.231655
WBGene00044068	0.144616	0.230722
WBGene00003825	0.144252	0.23014
WBGene00004978	0.143829	0.229465
WBGene00004028	0.143658	0.229193
WBGene00003134	0.143571	0.229053
WBGene00001596	0.143405	0.228789
WBGene00001486	0.143357	0.228712
WBGene00004736	0.142816	0.227848
WBGene00004116	0.142205	0.226872
WBGene00000419	0.142178	0.226829
WBGene00000933	0.14205	0.226624
WBGene00000413	0.141978	0.226509
WBGene00002189	0.141932	0.226437
WBGene00044440	0.140777	0.224593
WBGene00003836	0.140354	0.223917
WBGene00022048	0.140142	0.22358
WBGene00009290	0.139729	0.222919
WBGene00003078	0.139605	0.222721
WBGene00009975	0.13916	0.222011
WBGene00000226	0.13872	0.221308
WBGene00001101	0.138717	0.221304
WBGene00001169	0.138562	0.221056
WBGene00001748	0.138289	0.220622
WBGene00002191	0.138073	0.220277
WBGene00001329	0.137994	0.22015
WBGene00002694	0.137508	0.219374
WBGene00008133	0.136893	0.218393
WBGene00007756	0.136573	0.217882
WBGene00006352	0.13635	0.217526
WBGene00010051	0.135831	0.216697
WBGene00001377	0.135539	0.21623
WBGene00006593	0.135193	0.215678
WBGene00007217	0.135167	0.215637
WBGene00007413	0.134812	0.215071
WBGene00015021	0.134705	0.214899
WBGene00000888	0.134471	0.214526
WBGene00021020	0.134142	0.214001
WBGene00001365	0.134053	0.213859
WBGene00007684	0.133965	0.213719
WBGene00009888	0.133907	0.213626
WBGene00004729	0.133836	0.213512
WBGene00000516	0.13368	0.213263
WBGene00006706	0.133176	0.212459
WBGene00009671	0.132933	0.21207
WBGene00010766	0.132888	0.211999
WBGene00003948	0.132853	0.211943
WBGene00001085	0.132489	0.211362
WBGene00006701	0.132412	0.211239
WBGene00003477	0.132401	0.211221
WBGene00001835	0.132343	0.211129
WBGene00007534	0.131774	0.210221
WBGene00001597	0.131772	0.210216
WBGene00002066	0.131728	0.210146
WBGene00009267	0.131013	0.209005
WBGene00002217	0.130935	0.208881
WBGene00002981	0.130929	0.208871
WBGene00008338	0.130625	0.208386
WBGene00009829	0.129783	0.207042
WBGene00001509	0.129734	0.206964
WBGene00000368	0.129465	0.206534
WBGene00008565	0.129114	0.205974
WBGene00007586	0.129079	0.205918
WBGene00010012	0.128943	0.205701
WBGene00001647	0.12887	0.205585
WBGene00006771	0.128221	0.204548
WBGene00003790	0.127997	0.204191
WBGene00008665	0.127457	0.203328
WBGene00007188	0.127261	0.203016
WBGene00006963	0.127244	0.202989
WBGene00007952	0.126786	0.202257
WBGene00000974	0.126407	0.201653
WBGene00009926	0.126327	0.201524
WBGene00020215	0.125735	0.20058
WBGene00006915	0.125724	0.200562
WBGene00001328	0.125506	0.200214
WBGene00006447	0.125359	0.199979
WBGene00000387	0.125117	0.199592
WBGene00009962	0.124976	0.199368
WBGene00009825	0.124893	0.199235
WBGene00001924	0.124692	0.198914
WBGene00003234	0.124451	0.19853
WBGene00003253	0.124355	0.198377
WBGene00019401	0.1242	0.198129
WBGene00010805	0.124065	0.197913
WBGene00004815	0.123639	0.197233
WBGene00000838	0.123373	0.196808
WBGene00008224	0.123084	0.196347
WBGene00006957	0.122676	0.195696
WBGene00008919	0.122647	0.19565
WBGene00004077	0.122102	0.19478
WBGene00009207	0.122083	0.194749
WBGene00006793	0.121774	0.194255
WBGene00006869	0.121704	0.194144
WBGene00000988	0.121636	0.194036
WBGene00003903	0.1215	0.193818
WBGene00020717	0.121468	0.193767
WBGene00004131	0.120996	0.193014
WBGene00020931	0.120878	0.192826
WBGene00004743	0.120833	0.192754
WBGene00021022	0.120263	0.191843
WBGene00008948	0.119955	0.191352
WBGene00001087	0.119942	0.191331
WBGene00001609	0.119862	0.191204
WBGene00003065	0.119718	0.190973
WBGene00006988	0.119379	0.190432
WBGene00000500	0.118865	0.189611
WBGene00004154	0.118586	0.189166
WBGene00002991	0.118581	0.189158
WBGene00006367	0.118384	0.188844
WBGene00009745	0.118289	0.188693
WBGene00001933	0.118224	0.188589
WBGene00003576	0.118222	0.188585
WBGene00010326	0.118211	0.188568
WBGene00007744	0.117861	0.188009
WBGene00007012	0.117741	0.187818
WBGene00006382	0.117274	0.187072
WBGene00016020	0.117234	0.187009
WBGene00000798	0.116856	0.186404
WBGene00006914	0.116582	0.185968
WBGene00006831	0.11636	0.185613
WBGene00002060	0.116072	0.185154
WBGene00007201	0.115706	0.184569
WBGene00020383	0.115697	0.184555
WBGene00020962	0.115398	0.184078
WBGene00001599	0.115058	0.183535
WBGene00017016	0.114848	0.183199
WBGene00001916	0.114645	0.182875
WBGene00019007	0.11462	0.182835
WBGene00002249	0.114507	0.182655
WBGene00001080	0.114351	0.182406
WBGene00003912	0.114345	0.182396
WBGene00009628	0.114301	0.182326
WBGene00001869	0.114049	0.181923
WBGene00000369	0.114025	0.181885
WBGene00006795	0.114006	0.181855
WBGene00008311	0.113867	0.181632
WBGene00010905	0.113681	0.181336
WBGene00003907	0.112958	0.180182
WBGene00003242	0.112616	0.179636
WBGene00007975	0.112461	0.179388
WBGene00001258	0.11217	0.178925
WBGene00006796	0.111966	0.178598
WBGene00002348	0.111867	0.17844
WBGene00006066	0.11172	0.178206
WBGene00001993	0.111671	0.178127
WBGene00020553	0.111668	0.178122
WBGene00000837	0.111606	0.178024
WBGene00008769	0.11138	0.177662
WBGene00002227	0.111353	0.17762
WBGene00008380	0.110481	0.176228
WBGene00003087	0.110392	0.176086
WBGene00002190	0.110284	0.175912
WBGene00006750	0.109981	0.17543
WBGene00000804	0.109947	0.175375
WBGene00003882	0.109889	0.175283
WBGene00009499	0.109516	0.174688
WBGene00008990	0.109493	0.17465
WBGene00000109	0.109364	0.174445
WBGene00001177	0.109341	0.174407
WBGene00000187	0.109318	0.174372
WBGene00001819	0.109115	0.174047
WBGene00008805	0.108658	0.173318
WBGene00006863	0.108523	0.173102
WBGene00004279	0.108435	0.172962
WBGene00004804	0.108177	0.172549
WBGene00008385	0.107747	0.171863
WBGene00004174	0.107728	0.171833
WBGene00004125	0.107615	0.171652
WBGene00001913	0.107284	0.171124
WBGene00000870	0.10723	0.171037
WBGene00004180	0.106668	0.17014
WBGene00000903	0.105974	0.169033
WBGene00007355	0.105605	0.168444
WBGene00020026	0.105592	0.168422
WBGene00002335	0.105586	0.168413
WBGene00008639	0.105536	0.168334
WBGene00003037	0.105517	0.168303
WBGene00010093	0.105476	0.168238
WBGene00003172	0.105182	0.167768
WBGene00015515	0.104994	0.167469
WBGene00009987	0.104888	0.167299
WBGene00001510	0.104508	0.166692
WBGene00000161	0.10408	0.166009
WBGene00002148	0.104017	0.165908
WBGene00010890	0.103046	0.164359
WBGene00002011	0.102906	0.164134
WBGene00001046	0.102646	0.16372
WBGene00001033	0.102589	0.163629
WBGene00004510	0.102157	0.162939
WBGene00009672	0.10196	0.162624
WBGene00010629	0.101702	0.162212
WBGene00003798	0.101661	0.162148
WBGene00005078	0.101634	0.162103
WBGene00004768	0.101589	0.162032
WBGene00007171	0.101495	0.161883
WBGene00000506	0.101251	0.161492
WBGene00012020	0.101231	0.161461
WBGene00016015	0.100868	0.160881
WBGene00004337	0.100806	0.160782
WBGene00009583	0.100735	0.160669
WBGene00008480	0.100542	0.160361
WBGene00003918	0.100201	0.159816
WBGene00004098	0.0999782	0.159461
WBGene00001884	0.0998623	0.159275
WBGene00009456	0.0998374	0.159236
WBGene00001093	0.0993943	0.158528
WBGene00009365	0.0992109	0.158236
WBGene00022055	0.0991332	0.158112
WBGene00000552	0.0990396	0.157962
WBGene00004058	0.0989406	0.157804
WBGene00008448	0.0988279	0.157624
WBGene00001433	0.0987377	0.15748
WBGene00000086	0.0985549	0.157188
WBGene00020601	0.0980728	0.156419
WBGene00005011	0.0980448	0.156374
WBGene00000871	0.0980378	0.156363
WBGene00020218	0.0978812	0.156113
WBGene00002268	0.0974937	0.155494
WBGene00007977	0.0973846	0.15532
WBGene00003583	0.0973742	0.155303
WBGene00007616	0.0972819	0.155156
WBGene00020866	0.0972366	0.155084
WBGene00000940	0.0971796	0.154993
WBGene00005018	0.0971566	0.154956
WBGene00012000	0.0971417	0.154932
WBGene00009289	0.0967672	0.154335
WBGene00006491	0.0963248	0.153628
WBGene00004767	0.0962584	0.153522
WBGene00007018	0.0958561	0.15288
WBGene00002125	0.095817	0.152817
WBGene00001008	0.0955136	0.152333
WBGene00006392	0.0953503	0.152073
WBGene00009367	0.095274	0.151951
WBGene00004461	0.0952347	0.151888
WBGene00003515	0.0950421	0.15158
WBGene00001090	0.0950298	0.151561
WBGene00001232	0.0949878	0.151494
WBGene00002783	0.0948451	0.151266
WBGene00007434	0.0946708	0.150988
WBGene00022010	0.0945672	0.150822
WBGene00009940	0.0943769	0.150518
WBGene00007129	0.0942381	0.150297
WBGene00003495	0.0942055	0.150245
WBGene00020392	0.0941304	0.150125
WBGene00006993	0.0940202	0.149949
WBGene00001824	0.093934	0.149811
WBGene00006463	0.0937167	0.149465
WBGene00002054	0.0936031	0.149283
WBGene00008722	0.093441	0.149024
WBGene00009221	0.0932289	0.148686
WBGene00006974	0.0931876	0.14862
WBGene00009744	0.0927988	0.147999
WBGene00000204	0.0926961	0.147835
WBGene00007237	0.0926836	0.147815
WBGene00006062	0.0926337	0.147736
WBGene00002181	0.0925214	0.147556
WBGene00003936	0.0924978	0.147519
WBGene00007014	0.0917829	0.146377
WBGene00000914	0.0916658	0.14619
WBGene00001660	0.0914818	0.145897
WBGene00001358	0.0914428	0.145834
WBGene00006754	0.0912139	0.145469
WBGene00004813	0.091181	0.145417
WBGene00000479	0.091003	0.145132
WBGene00008428	0.0909876	0.145108
WBGene00000108	0.0909594	0.145063
WBGene00005024	0.0909115	0.144986
WBGene00006600	0.0908889	0.14495
WBGene00009380	0.090532	0.14438
WBGene00006536	0.0905021	0.144333
WBGene00001075	0.0904699	0.144281
WBGene00004138	0.0902838	0.143984
WBGene00004068	0.0897776	0.143176
WBGene00000937	0.0897574	0.143144
WBGene00004946	0.0897206	0.143085
WBGene00001481	0.089703	0.143057
WBGene00008149	0.0894282	0.142618
WBGene00006374	0.0894123	0.142593
WBGene00000103	0.0893597	0.142509
WBGene00000383	0.0892958	0.142407
WBGene00004110	0.0892783	0.142379
WBGene00006594	0.0891691	0.142205
WBGene00002074	0.088564	0.141239
WBGene00021012	0.088523	0.141173
WBGene00006787	0.0883682	0.140926
WBGene00001073	0.0883376	0.140877
WBGene00003497	0.0883121	0.140836
WBGene00000386	0.087953	0.140263
WBGene00009288	0.0878041	0.140025
WBGene00001196	0.0876826	0.139832
WBGene00022027	0.0875906	0.139685
WBGene00011116	0.0871214	0.138936
WBGene00004446	0.0868058	0.138432
WBGene00001707	0.0864719	0.137899
WBGene00003868	0.0864479	0.13786
WBGene00009444	0.0863558	0.137713
WBGene00000802	0.0863037	0.13763
WBGene00013000	0.085761	0.136764
WBGene00000403	0.0857118	0.136685
WBGene00000469	0.0857012	0.136668
WBGene00001746	0.0856116	0.136525
WBGene00004771	0.0854351	0.136244
WBGene00002240	0.0853268	0.136071
WBGene00004431	0.0851949	0.13586
WBGene00020796	0.0851755	0.135829
WBGene00009052	0.0850096	0.135564
WBGene00004377	0.0849944	0.13554
WBGene00005013	0.0849223	0.135425
WBGene00002026	0.0847699	0.135182
WBGene00009783	0.0847264	0.135112
WBGene00002299	0.0846658	0.135016
WBGene00001831	0.0841833	0.134245
WBGene00004886	0.0841293	0.134159
WBGene00001977	0.0840013	0.133955
WBGene00009064	0.0836321	0.133365
WBGene00004700	0.0835475	0.13323
WBGene00000776	0.0835003	0.133155
WBGene00004809	0.0833687	0.132945
WBGene00016116	0.0832621	0.132775
WBGene00020301	0.0831873	0.132655
WBGene00000977	0.0831647	0.132619
WBGene00004025	0.0831043	0.132523
WBGene00007054	0.0830725	0.132472
WBGene00019003	0.0829044	0.132203
WBGene00009479	0.0828703	0.132149
WBGene00002077	0.0825863	0.131696
WBGene00007762	0.082425	0.131438
WBGene00001156	0.0821882	0.13106
WBGene00004185	0.0821706	0.131032
WBGene00000254	0.0821363	0.130977
WBGene00003932	0.0821128	0.13094
WBGene00004038	0.082111	0.130937
WBGene00004981	0.082093	0.130908
WBGene00017011	0.0817372	0.13034
WBGene00003186	0.0811164	0.129349
WBGene00001023	0.0809478	0.12908
WBGene00004143	0.0808227	0.12888
WBGene00001888	0.0805693	0.128476
WBGene00007984	0.0802327	0.127938
WBGene00020286	0.0799717	0.127522
WBGene00004049	0.0799688	0.127517
WBGene00000121	0.079785	0.127224
WBGene00000181	0.0797375	0.127148
WBGene00009532	0.0795218	0.126803
WBGene00000106	0.0793029	0.126454
WBGene00001874	0.0792395	0.126353
WBGene00008642	0.0792141	0.126312
WBGene00007602	0.0789412	0.125876
WBGene00001338	0.0787877	0.125632
WBGene00003992	0.0787591	0.125586
WBGene00007203	0.0786747	0.125451
WBGene00006376	0.0786101	0.125348
WBGene00002004	0.0785059	0.125182
WBGene00002696	0.0781872	0.124673
WBGene00020038	0.0778114	0.124073
WBGene00004931	0.0775145	0.123599
WBGene00010481	0.0773993	0.123415
WBGene00009159	0.077217	0.123124
WBGene00004306	0.0770408	0.122843
WBGene00010767	0.0770154	0.122802
WBGene00002038	0.0769019	0.122621
WBGene00004296	0.0768909	0.122603
WBGene00000431	0.0767894	0.122441
WBGene00007400	0.0766379	0.122199
WBGene00007942	0.0765297	0.122027
WBGene00009385	0.0763171	0.121687
WBGene00002071	0.0762551	0.121588
WBGene00003787	0.0761468	0.121415
WBGene00007593	0.0760205	0.121214
WBGene00004371	0.0758056	0.120871
WBGene00002008	0.075802	0.120865
WBGene00003553	0.0757031	0.120707
WBGene00000426	0.0756394	0.120606
WBGene00006545	0.0756166	0.120569
WBGene00007704	0.0755637	0.120485
WBGene00020390	0.0755555	0.120472
WBGene00004699	0.0754825	0.120355
WBGene00001623	0.0754253	0.120264
WBGene00003816	0.0753935	0.120213
WBGene00000232	0.0753487	0.120141
WBGene00003792	0.0747525	0.11919
WBGene00006349	0.0746163	0.118972
WBGene00020509	0.074556	0.118876
WBGene00004128	0.0745072	0.118798
WBGene00000453	0.0744191	0.118657
WBGene00004245	0.0739944	0.117979
WBGene00004774	0.0737866	0.117648
WBGene00004702	0.0735593	0.117285
WBGene00020684	0.0734733	0.117147
WBGene00007966	0.073053	0.116476
WBGene00001224	0.0730462	0.116466
WBGene00004057	0.0730283	0.116437
WBGene00004995	0.0729669	0.116339
WBGene00009925	0.072617	0.11578
WBGene00005026	0.0726016	0.115756
WBGene00004875	0.072586	0.115731
WBGene00009454	0.072465	0.115538
WBGene00002324	0.0724322	0.115485
WBGene00020600	0.0724037	0.11544
WBGene00006942	0.0724005	0.115435
WBGene00003919	0.0723227	0.115311
WBGene00010610	0.0722353	0.115171
WBGene00002002	0.0719573	0.114727
WBGene00000818	0.0718351	0.114532
WBGene00003133	0.0717475	0.114392
WBGene00001036	0.0716727	0.114273
WBGene00020721	0.0716544	0.114244
WBGene00002295	0.0716327	0.114209
WBGene00012005	0.0714787	0.113963
WBGene00001973	0.0714329	0.11389
WBGene00007824	0.0712969	0.113673
WBGene00003563	0.0710728	0.113315
WBGene00010038	0.070928	0.113084
WBGene00003864	0.0709088	0.113053
WBGene00002214	0.0708197	0.112911
WBGene00003171	0.070768	0.112829
WBGene00001394	0.0697178	0.111152
WBGene00007385	0.0695964	0.110958
WBGene00006802	0.0692463	0.110399
WBGene00000813	0.069214	0.110348
WBGene00001056	0.0691058	0.110175
WBGene00020679	0.0690963	0.11016
WBGene00008363	0.0688911	0.109832
WBGene00001402	0.068698	0.109524
WBGene00003917	0.0685632	0.109309
WBGene00020092	0.0685411	0.109274
WBGene00006888	0.0685328	0.10926
WBGene00009882	0.0685019	0.109211
WBGene00000786	0.0685002	0.109208
WBGene00008505	0.0683812	0.109018
WBGene00008683	0.068109	0.108584
WBGene00001480	0.068074	0.108528
WBGene00001405	0.0678754	0.108211
WBGene00009287	0.0677555	0.108019
WBGene00003534	0.067746	0.108004
WBGene00010757	0.0676665	0.107877
WBGene00009013	0.0676475	0.107847
WBGene00008164	0.067589	0.107754
WBGene00007135	0.0675656	0.107716
WBGene00003963	0.0675587	0.107705
WBGene00004196	0.0672446	0.107204
WBGene00000118	0.0672402	0.107197
WBGene00007236	0.0670267	0.106856
WBGene00008361	0.0670137	0.106835
WBGene00006769	0.0670103	0.10683
WBGene00006626	0.0670004	0.106814
WBGene00006870	0.0668859	0.106631
WBGene00020993	0.0668324	0.106546
WBGene00006823	0.0668147	0.106517
WBGene00002915	0.0667574	0.106426
WBGene00006669	0.0666843	0.106309
WBGene00019001	0.0665789	0.106141
WBGene00008924	0.0665776	0.106139
WBGene00009801	0.0664734	0.105973
WBGene00003923	0.0663502	0.105776
WBGene00002235	0.0663348	0.105751
WBGene00000499	0.0663091	0.10571
WBGene00003056	0.0660887	0.105359
WBGene00008346	0.0659384	0.105119
WBGene00000382	0.0656811	0.104708
WBGene00009712	0.0656492	0.104657
WBGene00002034	0.0656409	0.104644
WBGene00001555	0.0655121	0.104438
WBGene00001955	0.065372	0.104214
WBGene00003220	0.065224	0.103978
WBGene00008781	0.065049	0.103699
WBGene00002998	0.0650183	0.10365
WBGene00007128	0.064978	0.103585
WBGene00001168	0.064964	0.103563
WBGene00001263	0.0645373	0.102882
WBGene00006571	0.0644876	0.102802
WBGene00008567	0.064397	0.102658
WBGene00020172	0.0643472	0.102578
WBGene00002081	0.0643279	0.102548
WBGene00001022	0.0643154	0.102527
WBGene00010699	0.0642375	0.102403
WBGene00020343	0.0641022	0.102187
WBGene00010063	0.06391	0.10188
WBGene00002992	0.0639002	0.101865
WBGene00011038	0.0638488	0.101783
WBGene00001050	0.0637884	0.101686
WBGene00006592	0.0637797	0.101672
WBGene00003476	0.063755	0.101633
WBGene00000466	0.0636772	0.101509
WBGene00008119	0.0635618	0.101324
WBGene00003804	0.0633689	0.101017
WBGene00001570	0.063287	0.100886
WBGene00001484	0.06306	0.100523
WBGene00000584	0.0630032	0.100433
WBGene00002203	0.0626335	0.0998425
WBGene00001617	0.0626328	0.0998415
WBGene00001488	0.062512	0.0996485
WBGene00010560	0.0624654	0.0995741
WBGene00000891	0.0624189	0.0994999
WBGene00007267	0.0621942	0.0991412
WBGene00000075	0.0621812	0.0991204
WBGene00009627	0.0618927	0.0986599
WBGene00003605	0.0617514	0.0984343
WBGene00009981	0.0616473	0.0982682
WBGene00001836	0.0615949	0.0981845
WBGene00009682	0.0615578	0.0981252
WBGene00003990	0.0614836	0.0980067
WBGene00000193	0.061393	0.0978622
WBGene00003980	0.0613817	0.0978441
WBGene00000995	0.0613363	0.0977716
WBGene00003870	0.0612552	0.0976422
WBGene00020368	0.0611851	0.0975302
WBGene00020840	0.0611764	0.0975164
WBGene00000202	0.061119	0.0974247
WBGene00003025	0.061095	0.0973865
WBGene00007302	0.0610443	0.0973055
WBGene00000548	0.0608064	0.0969257
WBGene00022052	0.060806	0.096925
WBGene00002990	0.0607617	0.0968543
WBGene00006739	0.0605935	0.0965859
WBGene00020499	0.060362	0.0962163
WBGene00001309	0.0601946	0.095949
WBGene00008027	0.0601287	0.0958438
WBGene00000553	0.0600285	0.0956838
WBGene00006509	0.0598755	0.0954396
WBGene00004132	0.0598198	0.0953506
WBGene00008333	0.0597355	0.0952161
WBGene00008441	0.0596109	0.0950172
WBGene00003129	0.0595832	0.0949729
WBGene00003508	0.0594866	0.0948187
WBGene00004063	0.0594515	0.0947628
WBGene00002131	0.0592021	0.0943645
WBGene00000180	0.0591129	0.0942222
WBGene00001983	0.0590933	0.0941908
WBGene00013021	0.0589363	0.0939402
WBGene00002219	0.0589068	0.0938931
WBGene00008508	0.0588062	0.0937325
WBGene00008860	0.0587438	0.093633
WBGene00007111	0.0587206	0.0935959
WBGene00010828	0.0586957	0.0935562
WBGene00020216	0.058513	0.0932644
WBGene00009341	0.0584946	0.093235
WBGene00001856	0.0584553	0.0931724
WBGene00010919	0.0584199	0.0931159
WBGene00007026	0.0582632	0.0928657
WBGene00004701	0.0578288	0.0921722
WBGene00006723	0.057757	0.0920575
WBGene00001957	0.0576497	0.0918863
WBGene00003228	0.0575877	0.0917873
WBGene00009740	0.0575175	0.0916752
WBGene00012004	0.0574791	0.0916139
WBGene00020425	0.0573687	0.0914377
WBGene00006923	0.0573005	0.0913288
WBGene00007627	0.0572241	0.0912068
WBGene00001821	0.0572237	0.0912062
WBGene00020757	0.0571593	0.0911034
WBGene00007991	0.0570967	0.0910035
WBGene00006928	0.0569727	0.0908055
WBGene00009908	0.0568494	0.0906087
WBGene00009736	0.0568449	0.0906015
WBGene00001603	0.0568183	0.0905589
WBGene00009521	0.0566548	0.0902979
WBGene00005020	0.0566379	0.090271
WBGene00000625	0.0566306	0.0902593
WBGene00001543	0.0566177	0.0902388
WBGene00000896	0.0565359	0.0901081
WBGene00001827	0.0564944	0.0900418
WBGene00020375	0.056298	0.0897284
WBGene00004287	0.0562259	0.0896132
WBGene00006697	0.0559223	0.0891285
WBGene00009880	0.0558623	0.0890328
WBGene00004333	0.0558524	0.089017
WBGene00008147	0.055801	0.088935
WBGene00000691	0.0557522	0.0888571
WBGene00003520	0.0554759	0.088416
WBGene00009118	0.055423	0.0883315
WBGene00003975	0.0553262	0.0881769
WBGene00000729	0.0552967	0.0881298
WBGene00001840	0.0552718	0.0880902
WBGene00007023	0.0551566	0.0879062
WBGene00001887	0.0549643	0.0875993
WBGene00000068	0.0547435	0.0872467
WBGene00009460	0.0547038	0.0871834
WBGene00007971	0.0546602	0.0871138
WBGene00006492	0.0546501	0.0870976
WBGene00008950	0.0546264	0.0870598
WBGene00008688	0.0545869	0.0869967
WBGene00002183	0.0543443	0.0866094
WBGene00000882	0.0543176	0.0865668
WBGene00004732	0.054299	0.0865371
WBGene00009681	0.0541964	0.0863733
WBGene00006912	0.0540285	0.0861053
WBGene00004194	0.0539375	0.0859601
WBGene00003001	0.0538607	0.0858374
WBGene00021005	0.0538204	0.0857731
WBGene00006061	0.0537848	0.0857163
WBGene00013004	0.0537423	0.0856484
WBGene00007025	0.0537142	0.0856035
WBGene00001558	0.0536436	0.0854909
WBGene00002850	0.0535901	0.0854054
WBGene00008533	0.0534222	0.0851374
WBGene00020040	0.0534151	0.085126
WBGene00003969	0.0533676	0.0850502
WBGene00001134	0.053315	0.0849662
WBGene00008061	0.0533047	0.0849498
WBGene00020652	0.0532207	0.0848156
WBGene00006468	0.0530874	0.0846029
WBGene00001334	0.0529894	0.0844465
WBGene00003965	0.0529854	0.08444
WBGene00003590	0.0529537	0.0843895
WBGene00010354	0.0529018	0.0843066
WBGene00010053	0.0528217	0.0841786
WBGene00007561	0.0527982	0.0841412
WBGene00001701	0.0527506	0.0840652
WBGene00007999	0.0526587	0.0839185
WBGene00002263	0.0525946	0.0838161
WBGene00008624	0.052583	0.0837976
WBGene00003166	0.0524796	0.0836325
WBGene00004104	0.0524517	0.083588
WBGene00004197	0.052435	0.0835613
WBGene00003112	0.0524216	0.08354
WBGene00004905	0.0521757	0.0831474
WBGene00004094	0.0519912	0.0828528
WBGene00006741	0.0519494	0.0827861
WBGene00000758	0.051947	0.0827823
WBGene00003391	0.051765	0.0824917
WBGene00001716	0.0515937	0.0822182
WBGene00007245	0.0512178	0.0816181
WBGene00004356	0.0511416	0.0814965
WBGene00000788	0.0511248	0.0814698
WBGene00011109	0.0511115	0.0814484
WBGene00000151	0.0511013	0.0814322
WBGene00007623	0.0510675	0.0813783
WBGene00007859	0.051044	0.0813407
WBGene00009439	0.050993	0.0812593
WBGene00001048	0.0509601	0.0812068
WBGene00004207	0.0508477	0.0810274
WBGene00003377	0.0508055	0.08096
WBGene00020504	0.0507627	0.0808916
WBGene00001862	0.0507304	0.0808401
WBGene00007927	0.0506164	0.0806581
WBGene00007145	0.0505814	0.0806022
WBGene00011033	0.0504687	0.0804224
WBGene00016011	0.0503189	0.0801832
WBGene00008220	0.0502552	0.0800814
WBGene00010113	0.0501966	0.0799879
WBGene00007959	0.0501461	0.0799073
WBGene00002053	0.0501132	0.0798548
WBGene00010233	0.0500221	0.0797094
WBGene00002162	0.0499903	0.0796586
WBGene00000198	0.0499632	0.0796153
WBGene00001186	0.0497266	0.0792377
WBGene00009878	0.0496694	0.0791464
WBGene00001554	0.0495516	0.0789583
WBGene00002977	0.0493932	0.0787053
WBGene00004897	0.0493867	0.0786949
WBGene00006486	0.0493435	0.078626
WBGene00001857	0.0493371	0.0786158
WBGene00011058	0.0493259	0.0785979
WBGene00009335	0.0493194	0.0785875
WBGene00003952	0.0492227	0.0784332
WBGene00000269	0.0491658	0.0783424
WBGene00001590	0.0489385	0.0779794
WBGene00001855	0.0488606	0.0778551
WBGene00001589	0.0487633	0.0776997
WBGene00004056	0.0485949	0.077431
WBGene00003499	0.0484497	0.0771991
WBGene00006385	0.048329	0.0770065
WBGene00008865	0.048281	0.0769299
WBGene00000720	0.0482422	0.0768678
WBGene00001860	0.0481829	0.0767732
WBGene00000039	0.0480549	0.0765688
WBGene00009578	0.0478866	0.0763002
WBGene00006436	0.047884	0.076296
WBGene00019008	0.047804	0.0761683
WBGene00004971	0.0477994	0.076161
WBGene00001410	0.0477153	0.0760268
WBGene00003588	0.0476661	0.0759482
WBGene00000815	0.0475518	0.0757657
WBGene00006766	0.0475214	0.0757171
WBGene00004737	0.0475166	0.0757095
WBGene00006543	0.0474755	0.0756439
WBGene00010006	0.0470839	0.0750188
WBGene00007499	0.0470169	0.0749118
WBGene00018006	0.0468745	0.0746845
WBGene00001187	0.0468603	0.0746618
WBGene00009500	0.0468339	0.0746196
WBGene00003164	0.0468276	0.0746096
WBGene00006416	0.0467802	0.074534
WBGene00006804	0.046775	0.0745257
WBGene00010040	0.0467163	0.074432
WBGene00002223	0.0466781	0.0743709
WBGene00013131	0.0463546	0.0738545
WBGene00006562	0.04634	0.0738311
WBGene00003659	0.0463129	0.0737879
WBGene00002216	0.0463123	0.0737869
WBGene00004205	0.0462929	0.073756
WBGene00006927	0.0462584	0.0737008
WBGene00009393	0.0462527	0.0736918
WBGene00009035	0.0462086	0.0736214
WBGene00009559	0.0461792	0.0735745
WBGene00010840	0.0461493	0.0735267
WBGene00009014	0.0460761	0.0734098
WBGene00020268	0.0460341	0.0733428
WBGene00007297	0.045979	0.0732549
WBGene00003580	0.0459666	0.073235
WBGene00004949	0.045964	0.073231
WBGene00004960	0.0458827	0.0731012
WBGene00007708	0.0458684	0.0730783
WBGene00004410	0.0457612	0.0729071
WBGene00000253	0.0457502	0.0728896
WBGene00004278	0.0457492	0.0728881
WBGene00004213	0.0457398	0.072873
WBGene00000024	0.0457338	0.0728634
WBGene00000414	0.045733	0.0728621
WBGene00000088	0.0457304	0.0728579
WBGene00008443	0.0457277	0.0728536
WBGene00007935	0.0457209	0.0728428
WBGene00003124	0.0456472	0.0727252
WBGene00004075	0.0455913	0.0726358
WBGene00001182	0.045553	0.0725748
WBGene00015099	0.0455391	0.0725526
WBGene00003955	0.0455113	0.0725083
WBGene00001137	0.0454592	0.072425
WBGene00006369	0.0454078	0.072343
WBGene00006882	0.0452259	0.0720526
WBGene00003034	0.0451986	0.072009
WBGene00020626	0.0450648	0.0717954
WBGene00006542	0.0450545	0.0717789
WBGene00014141	0.0449633	0.0716333
WBGene00000765	0.0449053	0.0715408
WBGene00020788	0.044903	0.0715371
WBGene00008316	0.0449024	0.0715361
WBGene00008887	0.0448219	0.0714076
WBGene00000095	0.0448001	0.0713728
WBGene00007228	0.0447903	0.0713572
WBGene00001233	0.0447386	0.0712747
WBGene00006063	0.0447235	0.0712505
WBGene00019011	0.0446699	0.071165
WBGene00006833	0.0446546	0.0711405
WBGene00000439	0.0446328	0.0711057
WBGene00007735	0.0445643	0.0709964
WBGene00009929	0.0444981	0.0708907
WBGene00020110	0.0444387	0.0707958
WBGene00003589	0.044414	0.0707564
WBGene00004993	0.044249	0.070493
WBGene00020114	0.0442459	0.0704881
WBGene00006377	0.0439687	0.0700456
WBGene00006994	0.0438778	0.0699005
WBGene00001682	0.0438654	0.0698807
WBGene00000843	0.0438525	0.06986
WBGene00003021	0.0437704	0.069729
WBGene00000175	0.0437447	0.0696879
WBGene00007645	0.0437232	0.0696537
WBGene00008137	0.0437181	0.0696455
WBGene00003774	0.0437005	0.0696173
WBGene00004859	0.0437005	0.0696173
WBGene00003085	0.0436752	0.069577
WBGene00009674	0.043666	0.0695623
WBGene00020442	0.0436171	0.0694843
WBGene00002265	0.043611	0.0694746
WBGene00000537	0.043609	0.0694713
WBGene00000693	0.0435894	0.0694401
WBGene00007464	0.0435444	0.0693683
WBGene00020376	0.0435392	0.06936
WBGene00003887	0.0434699	0.0692492
WBGene00004988	0.0434615	0.0692359
WBGene00001745	0.0434082	0.0691508
WBGene00008080	0.0433749	0.0690976
WBGene00007731	0.0432787	0.068944
WBGene00003059	0.0432021	0.0688217
WBGene00001127	0.0431142	0.0686814
WBGene00001092	0.0431025	0.0686628
WBGene00000894	0.0429989	0.0684974
WBGene00000025	0.0429964	0.0684933
WBGene00008974	0.0429345	0.0683945
WBGene00001791	0.0428845	0.0683147
WBGene00000473	0.0428533	0.0682649
WBGene00001135	0.0428009	0.0681812
WBGene00008399	0.0427396	0.0680835
WBGene00006745	0.0426639	0.0679625
WBGene00004139	0.0426604	0.0679569
WBGene00007045	0.0425871	0.0678399
WBGene00010244	0.042546	0.0677744
WBGene00004107	0.0425224	0.0677366
WBGene00007019	0.042494	0.0676912
WBGene00010231	0.0424453	0.0676136
WBGene00001680	0.0424346	0.0675964
WBGene00007352	0.0423597	0.0674769
WBGene00006396	0.0423193	0.0674124
WBGene00011017	0.0422584	0.0673153
WBGene00002188	0.0420963	0.0670563
WBGene00001553	0.0420511	0.0669843
WBGene00000001	0.041967	0.06685
WBGene00000037	0.041871	0.0666967
WBGene00004408	0.0418297	0.0666308
WBGene00000455	0.0418259	0.0666247
WBGene00020550	0.0418255	0.0666241
WBGene00009297	0.0417629	0.0665241
WBGene00007021	0.0416392	0.0663267
WBGene00010062	0.0415936	0.0662539
WBGene00006698	0.0415285	0.06615
WBGene00001489	0.0415118	0.0661233
WBGene00008371	0.0414254	0.0659854
WBGene00000241	0.0414047	0.0659523
WBGene00020287	0.0414026	0.065949
WBGene00004105	0.0413214	0.0658193
WBGene00001777	0.0413104	0.0658018
WBGene00020068	0.0412834	0.0657587
WBGene00009498	0.0412291	0.065672
WBGene00003577	0.0411622	0.0655651
WBGene00001778	0.0411547	0.0655532
WBGene00006574	0.0411105	0.0654827
WBGene00007944	0.0410333	0.0653594
WBGene00007187	0.0410151	0.0653303
WBGene00001253	0.0409703	0.0652588
WBGene00000475	0.040949	0.0652248
WBGene00002084	0.0409039	0.0651527
WBGene00002020	0.0408824	0.0651185
WBGene00004198	0.0408784	0.0651122
WBGene00000065	0.0407731	0.0649439
WBGene00000908	0.0407605	0.064924
WBGene00009915	0.0407462	0.064901
WBGene00007914	0.0407328	0.0648796
WBGene00007987	0.0407246	0.0648666
WBGene00007712	0.0406714	0.0647816
WBGene00006547	0.0406537	0.0647534
WBGene00007139	0.0406516	0.0647501
WBGene00007455	0.0405934	0.0646571
WBGene00015092	0.0405072	0.0645195
WBGene00008194	0.0404489	0.0644264
WBGene00001070	0.0404031	0.0643534
WBGene00008779	0.0403857	0.0643256
WBGene00001069	0.0403194	0.0642198
WBGene00004064	0.0402519	0.0641119
WBGene00006902	0.0402258	0.0640703
WBGene00003565	0.0402069	0.0640401
WBGene00000732	0.0401873	0.0640088
WBGene00006372	0.0401689	0.0639794
WBGene00007143	0.0401525	0.0639533
WBGene00003406	0.0401166	0.063896
WBGene00004225	0.0400646	0.063813
WBGene00000459	0.0400047	0.0637173
WBGene00009173	0.0399445	0.0636213
WBGene00003142	0.0397676	0.0633388
WBGene00004499	0.03976	0.0633266
WBGene00007015	0.039711	0.0632484
WBGene00002146	0.0394634	0.0628532
WBGene00009937	0.039455	0.0628398
WBGene00003905	0.0394238	0.0627899
WBGene00000188	0.0394152	0.0627762
WBGene00008670	0.0394111	0.0627697
WBGene00004160	0.0393512	0.062674
WBGene00007705	0.0391604	0.0623694
WBGene00009334	0.0391055	0.0622818
WBGene00007363	0.0390882	0.0622542
WBGene00007155	0.039048	0.0621901
WBGene00020585	0.0390225	0.0621493
WBGene00017000	0.0390171	0.0621407
WBGene00044001	0.0390163	0.0621394
WBGene00008081	0.0389924	0.0621013
WBGene00001374	0.0389044	0.0619608
WBGene00006556	0.0388617	0.0618926
WBGene00008430	0.0388561	0.0618836
WBGene00003089	0.0388336	0.0618477
WBGene00020264	0.0387986	0.0617918
WBGene00002150	0.0387632	0.0617354
WBGene00007412	0.0386976	0.0616307
WBGene00020035	0.0385884	0.0614563
WBGene00002032	0.0385882	0.061456
WBGene00007603	0.0385808	0.0614441
WBGene00020989	0.03849	0.0612991
WBGene00007252	0.0384898	0.0612989
WBGene00001519	0.0384657	0.0612604
WBGene00001910	0.0384267	0.0611981
WBGene00004308	0.0383768	0.0611185
WBGene00001527	0.038294	0.0609864
WBGene00020744	0.0382109	0.0608536
WBGene00007403	0.0382079	0.0608488
WBGene00020039	0.0381952	0.0608286
WBGene00009772	0.0381938	0.0608264
WBGene00009304	0.0381595	0.0607716
WBGene00009128	0.0381121	0.060696
WBGene00000170	0.0380242	0.0605557
WBGene00020088	0.0379962	0.0605109
WBGene00004059	0.0379942	0.0605076
WBGene00020030	0.037987	0.0604962
WBGene00002243	0.0379581	0.0604501
WBGene00020808	0.0379316	0.0604078
WBGene00003968	0.0379196	0.0603887
WBGene00003939	0.0378906	0.0603423
WBGene00000660	0.037815	0.0602217
WBGene00009370	0.0377464	0.0601121
WBGene00003473	0.0377244	0.060077
WBGene00010229	0.0376947	0.0600296
WBGene00000728	0.0376084	0.0598918
WBGene00003153	0.0375801	0.0598466
WBGene00044077	0.0375476	0.0597947
WBGene00002242	0.0374481	0.0596358
WBGene00000437	0.0374049	0.0595669
WBGene00020274	0.0373737	0.0595171
WBGene00020801	0.0373242	0.059438
WBGene00003015	0.0372779	0.0593643
WBGene00009400	0.0370968	0.059075
WBGene00001426	0.0370575	0.0590124
WBGene00010079	0.0369678	0.0588691
WBGene00003678	0.0368918	0.0587478
WBGene00007646	0.0368549	0.058689
WBGene00004769	0.0368184	0.0586306
WBGene00008131	0.0367622	0.0585408
WBGene00001562	0.0367565	0.0585318
WBGene00003582	0.03671	0.0584576
WBGene00009129	0.0366392	0.0583445
WBGene00009346	0.036606	0.0582916
WBGene00006824	0.0365869	0.0582611
WBGene00009372	0.036571	0.0582357
WBGene00010280	0.0364762	0.0580844
WBGene00008710	0.0364166	0.0579891
WBGene00007047	0.0363876	0.0579429
WBGene00009594	0.0363857	0.0579398
WBGene00008664	0.0363773	0.0579264
WBGene00010744	0.0363381	0.0578639
WBGene00010370	0.036282	0.0577743
WBGene00008238	0.0362818	0.0577739
WBGene00001019	0.0362586	0.0577369
WBGene00003865	0.0362403	0.0577077
WBGene00009505	0.0362301	0.0576915
WBGene00007234	0.0361075	0.0574958
WBGene00008404	0.0358545	0.0570918
WBGene00003958	0.0358498	0.0570843
WBGene00000155	0.0358178	0.0570332
WBGene00003035	0.0356973	0.0568409
WBGene00001366	0.0356818	0.056816
WBGene00004350	0.0356264	0.0567277
WBGene00004167	0.0355697	0.0566371
WBGene00006552	0.0354896	0.0565092
WBGene00010496	0.0354791	0.0564926
WBGene00004052	0.0354727	0.0564823
WBGene00004360	0.035467	0.0564732
WBGene00004257	0.0354298	0.0564139
WBGene00001812	0.0354189	0.0563964
WBGene00008502	0.0354179	0.0563948
WBGene00004481	0.0354125	0.0563862
WBGene00009575	0.0353951	0.0563584
WBGene00010681	0.0353099	0.0562225
WBGene00001119	0.0352614	0.056145
WBGene00001503	0.0352149	0.0560707
WBGene00004086	0.035185	0.0560231
WBGene00003676	0.0351651	0.0559912
WBGene00007303	0.0351591	0.0559816
WBGene00009879	0.0350648	0.0558311
WBGene00002996	0.0350334	0.0557809
WBGene00003635	0.0349859	0.0557052
WBGene00004147	0.0349735	0.0556853
WBGene00021010	0.0349462	0.0556418
WBGene00001781	0.0348982	0.0555651
WBGene00004372	0.0348094	0.0554234
WBGene00002368	0.0346834	0.0552223
WBGene00003400	0.0346649	0.0551928
WBGene00004918	0.0346546	0.0551762
WBGene00016002	0.0346078	0.0551016
WBGene00008362	0.0344578	0.0548621
WBGene00000992	0.0344529	0.0548544
WBGene00000941	0.0344219	0.0548048
WBGene00008344	0.0344135	0.0547914
WBGene00004411	0.0344079	0.0547824
WBGene00020321	0.0344046	0.0547772
WBGene00020071	0.0343953	0.0547624
WBGene00000889	0.0342105	0.0544672
WBGene00003516	0.0341991	0.0544492
WBGene00007277	0.0341552	0.0543791
WBGene00007630	0.0341324	0.0543426
WBGene00009141	0.034121	0.0543245
WBGene00000133	0.0340971	0.0542862
WBGene00009375	0.0340323	0.0541828
WBGene00003656	0.0339738	0.0540894
WBGene00006975	0.0339232	0.0540086
WBGene00004269	0.0337121	0.0536717
WBGene00004083	0.0337111	0.0536701
WBGene00008578	0.0336679	0.0536011
WBGene00004821	0.0336318	0.0535435
WBGene00007186	0.033589	0.0534751
WBGene00004171	0.0335798	0.0534605
WBGene00003233	0.0335433	0.0534021
WBGene00001790	0.0334971	0.0533284
WBGene00008410	0.0333778	0.053138
WBGene00007226	0.03337	0.0531256
WBGene00010621	0.0333321	0.053065
WBGene00000212	0.033255	0.0529419
WBGene00020803	0.0332435	0.0529236
WBGene00010303	0.0332096	0.0528695
WBGene00003954	0.0332033	0.0528595
WBGene00001066	0.0331625	0.0527942
WBGene00004440	0.0331419	0.0527613
WBGene00004338	0.0331119	0.0527134
WBGene00000259	0.033082	0.0526657
WBGene00001077	0.0330422	0.0526021
WBGene00009135	0.0330362	0.0525926
WBGene00002248	0.032938	0.0524358
WBGene00002178	0.0329326	0.0524272
WBGene00003472	0.0329207	0.0524082
WBGene00009436	0.032811	0.0522332
WBGene00003082	0.032801	0.0522171
WBGene00001608	0.0326944	0.052047
WBGene00008819	0.0326556	0.0519849
WBGene00004704	0.0325913	0.0518824
WBGene00000683	0.0325818	0.0518672
WBGene00008775	0.0325768	0.0518592
WBGene00004913	0.0325744	0.0518554
WBGene00011040	0.0325682	0.0518455
WBGene00009922	0.0325539	0.0518227
WBGene00006395	0.032459	0.0516712
WBGene00010383	0.0324555	0.0516655
WBGene00001368	0.0324459	0.0516503
WBGene00003480	0.0324227	0.0516132
WBGene00000731	0.0323711	0.0515309
WBGene00002051	0.032365	0.051521
WBGene00008205	0.0323628	0.0515176
WBGene00000145	0.0323393	0.0514801
WBGene00009185	0.0322824	0.0513893
WBGene00002891	0.0322642	0.0513602
WBGene00009320	0.0322331	0.0513105
WBGene00001971	0.0321762	0.0512196
WBGene00007549	0.0321409	0.0511633
WBGene00000794	0.0320955	0.0510909
WBGene00007022	0.0320827	0.0510703
WBGene00009119	0.0320463	0.0510123
WBGene00008062	0.0320398	0.0510019
WBGene00007117	0.0320027	0.0509427
WBGene00001981	0.0319632	0.0508797
WBGene00010844	0.0319143	0.0508015
WBGene00008387	0.0318693	0.0507297
WBGene00006864	0.0318579	0.0507116
WBGene00002130	0.0318064	0.0506293
WBGene00020612	0.0317501	0.0505394
WBGene00009634	0.0316659	0.0504051
WBGene00007425	0.0316371	0.0503591
WBGene00009008	0.0315939	0.0502901
WBGene00003405	0.031591	0.0502854
WBGene00004087	0.0315153	0.0501646
WBGene00020282	0.0314827	0.0501125
WBGene00009923	0.0314262	0.0500223
WBGene00008339	0.0314161	0.0500063
WBGene00003412	0.0314084	0.0499939
WBGene00001425	0.0314	0.0499805
WBGene00002023	0.031395	0.0499726
WBGene00008000	0.0313672	0.0499281
WBGene00001998	0.0313566	0.0499113
WBGene00000140	0.0313423	0.0498885
WBGene00009884	0.0313105	0.0498377
WBGene00001717	0.0312361	0.0497188
WBGene00001678	0.031209	0.0496756
WBGene00000965	0.031165	0.0496054
WBGene00000058	0.0311542	0.0495881
WBGene00000430	0.0310122	0.0493614
WBGene00000761	0.0309963	0.049336
WBGene00010137	0.0309654	0.0492868
WBGene00009352	0.0309541	0.0492688
WBGene00002637	0.0309177	0.0492105
WBGene00006404	0.0309171	0.0492096
WBGene00003566	0.0308669	0.0491294
WBGene00002201	0.0308578	0.049115
WBGene00020261	0.0307479	0.0489395
WBGene00003735	0.0307381	0.0489238
WBGene00000472	0.0306601	0.0487993
WBGene00001854	0.0306293	0.0487503
WBGene00000777	0.0306135	0.0487249
WBGene00007625	0.0306038	0.0487095
WBGene00001452	0.0305533	0.0486289
WBGene00005012	0.0305391	0.0486062
WBGene00008107	0.0305323	0.0485952
WBGene00000680	0.0304849	0.0485197
WBGene00003000	0.030474	0.0485022
WBGene00002855	0.0304719	0.0484988
WBGene00012021	0.0304693	0.0484947
WBGene00000418	0.0304233	0.0484213
WBGene00003786	0.030389	0.0483666
WBGene00003533	0.0303725	0.0483403
WBGene00006852	0.0303714	0.0483385
WBGene00007733	0.0303641	0.0483268
WBGene00004820	0.0303543	0.0483111
WBGene00010474	0.030349	0.0483027
WBGene00006783	0.0303431	0.0482933
WBGene00008825	0.0302838	0.0481986
WBGene00002989	0.0302644	0.0481677
WBGene00006472	0.0302388	0.0481268
WBGene00002058	0.0302368	0.0481236
WBGene00001404	0.030208	0.0480776
WBGene00000766	0.0302071	0.0480762
WBGene00000834	0.0301616	0.0480036
WBGene00006958	0.0301571	0.0479964
WBGene00000099	0.030131	0.0479546
WBGene00004787	0.0301005	0.047906
WBGene00000397	0.0300891	0.0478878
WBGene00001898	0.0300619	0.0478443
WBGene00006812	0.0300395	0.0478086
WBGene00000136	0.0300137	0.0477674
WBGene00008082	0.0299892	0.0477283
WBGene00004121	0.0299766	0.0477082
WBGene00000771	0.0298892	0.0475687
WBGene00010613	0.0298644	0.0475291
WBGene00003593	0.0298511	0.0475078
WBGene00000641	0.0297862	0.0474043
WBGene00000146	0.0297597	0.047362
WBGene00009958	0.0297177	0.0472949
WBGene00009224	0.0297094	0.0472817
WBGene00001758	0.0297037	0.0472725
WBGene00000272	0.0296999	0.0472665
WBGene00003978	0.0296584	0.0472003
WBGene00008841	0.0296069	0.0471181
WBGene00004210	0.029588	0.0470878
WBGene00000887	0.0295737	0.0470649
WBGene00003389	0.0295551	0.0470353
WBGene00007225	0.0295188	0.0469773
WBGene00017007	0.0294962	0.0469413
WBGene00007591	0.0294737	0.0469053
WBGene00004947	0.0294644	0.0468905
WBGene00001038	0.0294322	0.046839
WBGene00002080	0.0294117	0.0468064
WBGene00044094	0.0294007	0.0467888
WBGene00004255	0.0293417	0.0466946
WBGene00007048	0.0293076	0.0466401
WBGene00004945	0.0292793	0.0465951
WBGene00003149	0.0292681	0.0465771
WBGene00022043	0.0292442	0.046539
WBGene00008318	0.0291956	0.0464613
WBGene00000467	0.0291858	0.0464458
WBGene00004037	0.0291745	0.0464277
WBGene00003842	0.029173	0.0464253
WBGene00007105	0.0291442	0.0463794
WBGene00004011	0.0291321	0.0463601
WBGene00020908	0.0291105	0.0463255
WBGene00003592	0.0290963	0.0463028
WBGene00003803	0.0290268	0.0461919
WBGene00000764	0.028974	0.0461077
WBGene00008571	0.0289664	0.0460955
WBGene00000420	0.0289533	0.0460746
WBGene00020682	0.0289359	0.0460468
WBGene00005002	0.0289228	0.0460258
WBGene00006380	0.0288153	0.0458543
WBGene00009098	0.028704	0.0456766
WBGene00020284	0.0286982	0.0456673
WBGene00000976	0.0286007	0.0455116
WBGene00004113	0.0285566	0.0454412
WBGene00000877	0.0285504	0.0454314
WBGene00010072	0.0285282	0.0453959
WBGene00004237	0.0285215	0.0453852
WBGene00003402	0.0285136	0.0453726
WBGene00009793	0.0284983	0.0453481
WBGene00020094	0.0284673	0.0452987
WBGene00003601	0.028442	0.0452584
WBGene00003586	0.0284307	0.0452403
WBGene00009007	0.0284051	0.0451994
WBGene00007647	0.0284017	0.045194
WBGene00007264	0.0283943	0.0451821
WBGene00004788	0.0283635	0.0451331
WBGene00003020	0.0283542	0.0451182
WBGene00003026	0.0283238	0.0450696
WBGene00020417	0.0282953	0.0450242
WBGene00009319	0.0282696	0.0449832
WBGene00003163	0.0282595	0.0449669
WBGene00000249	0.0282593	0.0449666
WBGene00020190	0.0282552	0.0449601
WBGene00015091	0.0281852	0.0448484
WBGene00003934	0.0281761	0.0448338
WBGene00017003	0.0281654	0.0448168
WBGene00010335	0.0281652	0.0448165
WBGene00003732	0.0281456	0.0447852
WBGene00003006	0.0281387	0.0447741
WBGene00007099	0.0281175	0.0447403
WBGene00010317	0.0280174	0.0445805
WBGene00004507	0.0279789	0.044519
WBGene00007450	0.0279419	0.04446
WBGene00009112	0.0279133	0.0444142
WBGene00007653	0.0278997	0.0443926
WBGene00002264	0.0278885	0.0443746
WBGene00008530	0.0278782	0.0443582
WBGene00008317	0.0278153	0.0442578
WBGene00004184	0.0277999	0.0442332
WBGene00006519	0.0277935	0.044223
WBGene00003776	0.0277327	0.044126
WBGene00007333	0.0277116	0.0440923
WBGene00009329	0.0276885	0.0440553
WBGene00000513	0.0276162	0.04394
WBGene00003084	0.0276079	0.0439267
WBGene00008494	0.0276024	0.0439179
WBGene00020109	0.0275981	0.043911
WBGene00008559	0.0275457	0.0438274
WBGene00001606	0.0275443	0.0438252
WBGene00020933	0.0275441	0.0438248
WBGene00004152	0.0275324	0.0438063
WBGene00017777	0.0275185	0.043784
WBGene00001037	0.0275171	0.0437818
WBGene00008490	0.0275037	0.0437605
WBGene00003182	0.0274214	0.043629
WBGene00009938	0.027412	0.043614
WBGene00020884	0.0274093	0.0436097
WBGene00007463	0.0273776	0.0435591
WBGene00009834	0.0273572	0.0435264
WBGene00001948	0.0273122	0.0434546
WBGene00009813	0.0272891	0.0434178
WBGene00000463	0.0272823	0.0434069
WBGene00015002	0.0272727	0.0433916
WBGene00001522	0.0272279	0.0433201
WBGene00001943	0.0272247	0.0433149
WBGene00009799	0.0272044	0.0432826
WBGene00000592	0.0271815	0.043246
WBGene00000835	0.0271781	0.0432406
WBGene00009337	0.0271545	0.0432029
WBGene00004146	0.0271062	0.0431258
WBGene00004922	0.0270973	0.0431116
WBGene00004427	0.0270774	0.0430798
WBGene00006391	0.0270386	0.0430179
WBGene00000210	0.0269983	0.0429536
WBGene00008783	0.0269589	0.0428907
WBGene00006932	0.026938	0.0428573
WBGene00007554	0.0269046	0.042804
WBGene00002827	0.0267421	0.0425446
WBGene00003822	0.026714	0.0424997
WBGene00022040	0.0267096	0.0424927
WBGene00006414	0.0266832	0.0424505
WBGene00007109	0.0266123	0.0423373
[truncated: 16,464 more rows]

## Sheet: TableS4
Table S4. Ranked cross-species essentiality probabilities for D. melanogaster genes defined by an eXtreme Gradient Boosting (XGB) model trained with C. elegans data
An eXtreme Gradient Boosting (XGB) machine learning model was trained with the genes and best-predictive features of C. elegans, and then used to predict essentiality for D. melanogaster genes.
Gene ID	Probability	Normalised (0-1)
FBgn0032388	0.683855	1
FBgn0021814	0.550344	0.804694
FBgn0001491	0.502277	0.73438
FBgn0037550	0.495367	0.724271
FBgn0003449	0.492183	0.719615
FBgn0001197	0.489462	0.715635
FBgn0010213	0.485363	0.709638
FBgn0031040	0.481265	0.703643
FBgn0040235	0.479618	0.701234
FBgn0032105	0.47545	0.695137
FBgn0011704	0.473388	0.692121
FBgn0036740	0.470872	0.68844
FBgn0033556	0.4702	0.687457
FBgn0020369	0.46583	0.681064
FBgn0030711	0.46348	0.677627
FBgn0010602	0.462807	0.676642
FBgn0020633	0.461885	0.675293
FBgn0038320	0.461731	0.675067
FBgn0034051	0.456447	0.667338
FBgn0033663	0.453049	0.662367
FBgn0010747	0.445886	0.65189
FBgn0004419	0.444292	0.649557
FBgn0031639	0.443231	0.648006
FBgn0036213	0.441039	0.644798
FBgn0014028	0.435217	0.636282
FBgn0005593	0.434804	0.635678
FBgn0036974	0.433588	0.633899
FBgn0001565	0.433423	0.633657
FBgn0002736	0.433379	0.633593
FBgn0010408	0.431121	0.63029
FBgn0036462	0.42818	0.625989
FBgn0035374	0.427145	0.624474
FBgn0032720	0.425502	0.62207
FBgn0004856	0.42444	0.620518
FBgn0002622	0.424375	0.620422
FBgn0044030	0.423589	0.619273
FBgn0050122	0.422469	0.617634
FBgn0005655	0.421605	0.61637
FBgn0037543	0.420839	0.61525
FBgn0000996	0.420781	0.615164
FBgn0028686	0.418462	0.611772
FBgn0015282	0.417442	0.61028
FBgn0031980	0.414823	0.606449
FBgn0040066	0.411274	0.601257
FBgn0017577	0.410947	0.60078
FBgn0037051	0.410566	0.600222
FBgn0040078	0.41049	0.600111
FBgn0039218	0.409932	0.599295
FBgn0032244	0.409433	0.598564
FBgn0010411	0.408625	0.597382
FBgn0038853	0.407149	0.595223
FBgn0028688	0.407021	0.595035
FBgn0022069	0.406351	0.594055
FBgn0038585	0.40526	0.592459
FBgn0027054	0.404609	0.591507
FBgn0032030	0.403362	0.589683
FBgn0038805	0.402482	0.588396
FBgn0033548	0.402205	0.587991
FBgn0051611	0.402148	0.587907
FBgn0033210	0.401433	0.586862
FBgn0000115	0.399248	0.583666
FBgn0028689	0.398669	0.582819
FBgn0039233	0.398668	0.582817
FBgn0028700	0.397981	0.581812
FBgn0001233	0.395903	0.578772
FBgn0010356	0.394425	0.57661
FBgn0035640	0.390894	0.571445
FBgn0000100	0.390144	0.570348
FBgn0011570	0.389957	0.570073
FBgn0002525	0.389888	0.569973
FBgn0011604	0.388992	0.568662
FBgn0033317	0.38793	0.567108
FBgn0004106	0.387363	0.566279
FBgn0037657	0.38705	0.565822
FBgn0051126	0.386773	0.565416
FBgn0086706	0.386031	0.564331
FBgn0010926	0.384053	0.561438
FBgn0027053	0.382998	0.559894
FBgn0004597	0.38118	0.557235
FBgn0030136	0.380947	0.556894
FBgn0025716	0.378733	0.553655
FBgn0025366	0.378523	0.553347
FBgn0033209	0.378347	0.553091
FBgn0022942	0.37781	0.552305
FBgn0039115	0.375761	0.549307
FBgn0016697	0.373175	0.545525
FBgn0004177	0.37228	0.544215
FBgn0086904	0.370775	0.542013
FBgn0010278	0.369781	0.54056
FBgn0011787	0.369585	0.540274
FBgn0005411	0.367433	0.537125
FBgn0032408	0.36722	0.536814
FBgn0010328	0.366314	0.535487
FBgn0030306	0.365414	0.534171
FBgn0052100	0.36492	0.533449
FBgn0030915	0.364898	0.533417
FBgn0010422	0.364481	0.532807
FBgn0005278	0.364271	0.5325
FBgn0031851	0.364079	0.532218
FBgn0004227	0.363182	0.530906
FBgn0037873	0.363064	0.530734
FBgn0010173	0.362547	0.529978
FBgn0034708	0.361647	0.528661
FBgn0003884	0.361611	0.528608
FBgn0000566	0.361456	0.528381
FBgn0052344	0.361311	0.528169
FBgn0000139	0.360815	0.527444
FBgn0024227	0.360173	0.526505
FBgn0003525	0.35881	0.524511
FBgn0003279	0.35875	0.524424
FBgn0020910	0.358719	0.524377
FBgn0003978	0.358382	0.523885
FBgn0035630	0.358199	0.523617
FBgn0005533	0.357663	0.522833
FBgn0010265	0.357066	0.521959
FBgn0036686	0.356524	0.521167
FBgn0085436	0.355978	0.520368
FBgn0030672	0.355935	0.520305
FBgn0000212	0.354617	0.518377
FBgn0039828	0.353548	0.516813
FBgn0032138	0.353284	0.516427
FBgn0004867	0.353187	0.516286
FBgn0002022	0.352332	0.515035
FBgn0034534	0.351631	0.514009
FBgn0020305	0.351546	0.513884
FBgn0004868	0.3513	0.513524
FBgn0040283	0.350084	0.511747
FBgn0014029	0.349472	0.51085
FBgn0038473	0.348971	0.510118
FBgn0002284	0.348967	0.510112
FBgn0035524	0.347546	0.508033
FBgn0011211	0.347474	0.507928
FBgn0024733	0.346702	0.506798
FBgn0035141	0.346325	0.506247
FBgn0040793	0.345906	0.505634
FBgn0087013	0.345876	0.50559
FBgn0030038	0.345037	0.504363
FBgn0039337	0.344911	0.504179
FBgn0039743	0.344222	0.503171
FBgn0041702	0.343898	0.502697
FBgn0003330	0.343208	0.501688
FBgn0030241	0.343178	0.501643
FBgn0002638	0.342623	0.500832
FBgn0035753	0.342385	0.500484
FBgn0039600	0.340959	0.498397
FBgn0033523	0.340831	0.49821
FBgn0026427	0.340823	0.498199
FBgn0000339	0.338985	0.495511
FBgn0022338	0.338521	0.494832
FBgn0038768	0.337539	0.493395
FBgn0003687	0.337275	0.493009
FBgn0035601	0.334744	0.489307
FBgn0002873	0.334479	0.488919
FBgn0002914	0.334457	0.488886
FBgn0002283	0.333421	0.487371
FBgn0034000	0.333392	0.487328
FBgn0023175	0.333311	0.48721
FBgn0069242	0.333085	0.486879
FBgn0003512	0.332724	0.486351
FBgn0030208	0.332414	0.485898
FBgn0000042	0.331423	0.484447
FBgn0031049	0.331004	0.483835
FBgn0011817	0.330386	0.48293
FBgn0003277	0.330365	0.482901
FBgn0020306	0.330188	0.482641
FBgn0036734	0.329761	0.482017
FBgn0036136	0.328717	0.48049
FBgn0003275	0.328656	0.4804
FBgn0015818	0.328145	0.479653
FBgn0028982	0.327742	0.479064
FBgn0010348	0.326928	0.477872
FBgn0028833	0.326601	0.477394
FBgn0003479	0.326163	0.476753
FBgn0031601	0.326003	0.47652
FBgn0010280	0.325936	0.476422
FBgn0010520	0.324339	0.474085
FBgn0086768	0.324143	0.473798
FBgn0050499	0.323707	0.47316
FBgn0032051	0.323261	0.472508
FBgn0031145	0.322588	0.471525
FBgn0016687	0.320783	0.468884
FBgn0086710	0.320538	0.468525
FBgn0032236	0.319722	0.467331
FBgn0034065	0.319383	0.466835
FBgn0032919	0.319224	0.466603
FBgn0039697	0.319114	0.466442
FBgn0031030	0.318935	0.46618
FBgn0041171	0.318908	0.466141
FBgn0013717	0.318892	0.466117
FBgn0033081	0.318678	0.465804
FBgn0037220	0.317136	0.463548
FBgn0260962	0.316439	0.462529
FBgn0000064	0.316437	0.462527
FBgn0061515	0.315284	0.460839
FBgn0029113	0.31502	0.460453
FBgn0035534	0.314964	0.460371
FBgn0082598	0.314628	0.459879
FBgn0011745	0.314299	0.459398
FBgn0033699	0.313934	0.458865
FBgn0030503	0.313752	0.458598
FBgn0030061	0.313505	0.458237
FBgn0037255	0.313372	0.458042
FBgn0037340	0.312946	0.457419
FBgn0086656	0.312844	0.45727
FBgn0040666	0.312554	0.456846
FBgn0024542	0.312409	0.456633
FBgn0039868	0.312101	0.456183
FBgn0032634	0.312036	0.456088
FBgn0004924	0.312005	0.456042
FBgn0004587	0.311984	0.456012
FBgn0086707	0.311589	0.455434
FBgn0020412	0.311294	0.455002
FBgn0010590	0.311291	0.454998
FBgn0038363	0.311212	0.454882
FBgn0032321	0.310625	0.454024
FBgn0011741	0.309914	0.452984
FBgn0086694	0.308382	0.450742
FBgn0002787	0.30838	0.45074
FBgn0043001	0.307233	0.449062
FBgn0039790	0.307216	0.449037
FBgn0033379	0.306931	0.44862
FBgn0001104	0.306859	0.448515
FBgn0040296	0.30663	0.44818
FBgn0038478	0.306348	0.447767
FBgn0050404	0.306055	0.447339
FBgn0026566	0.305822	0.446998
FBgn0036099	0.30562	0.446703
FBgn0003257	0.304836	0.445555
FBgn0038678	0.304383	0.444892
FBgn0030803	0.303595	0.44374
FBgn0003545	0.303584	0.443723
FBgn0031977	0.303556	0.443682
FBgn0001098	0.30277	0.442534
FBgn0050085	0.302564	0.442231
FBgn0000253	0.302018	0.441433
FBgn0032690	0.300542	0.439274
FBgn0086856	0.300314	0.438941
FBgn0000611	0.299538	0.437805
FBgn0036052	0.299529	0.437792
FBgn0039338	0.299423	0.437637
FBgn0034084	0.299358	0.437542
FBgn0031711	0.299253	0.437389
FBgn0039557	0.299135	0.437215
FBgn0033998	0.298541	0.436347
FBgn0005771	0.298493	0.436277
FBgn0020497	0.298418	0.436167
FBgn0037737	0.298317	0.43602
FBgn0031660	0.298273	0.435955
FBgn0004855	0.298246	0.435915
FBgn0010501	0.298148	0.435772
FBgn0005355	0.297914	0.435429
FBgn0010105	0.296864	0.433894
FBgn0030354	0.296769	0.433754
FBgn0026380	0.29658	0.433478
FBgn0086695	0.296365	0.433164
FBgn0036516	0.29631	0.433083
FBgn0004647	0.296038	0.432686
FBgn0028684	0.295987	0.43261
FBgn0038277	0.295975	0.432593
FBgn0039558	0.295906	0.432492
FBgn0026207	0.295642	0.432107
FBgn0014026	0.295619	0.432073
FBgn0036135	0.295604	0.432051
FBgn0038166	0.295597	0.43204
FBgn0000581	0.295476	0.431863
FBgn0036696	0.295334	0.431656
FBgn0027567	0.294962	0.431112
FBgn0004465	0.294313	0.430162
FBgn0002924	0.294265	0.430092
FBgn0038601	0.294157	0.429934
FBgn0010774	0.293858	0.429497
FBgn0086779	0.293791	0.429399
FBgn0000377	0.293473	0.428934
FBgn0038834	0.293065	0.428336
FBgn0033117	0.292168	0.427024
FBgn0033907	0.292163	0.427017
FBgn0004436	0.291633	0.426242
FBgn0003885	0.291087	0.425443
FBgn0032059	0.290572	0.42469
FBgn0002590	0.290461	0.424528
FBgn0021906	0.29044	0.424496
FBgn0022027	0.289936	0.42376
FBgn0033734	0.289826	0.423598
FBgn0005648	0.2893	0.422829
FBgn0026320	0.28906	0.422477
FBgn0030366	0.288944	0.422309
FBgn0003041	0.288741	0.422011
FBgn0000618	0.288592	0.421794
FBgn0052672	0.288483	0.421633
FBgn0033341	0.288426	0.421551
FBgn0035355	0.288253	0.421297
FBgn0004049	0.287692	0.420476
FBgn0003391	0.28695	0.41939
FBgn0010516	0.286636	0.418932
FBgn0011760	0.286343	0.418503
FBgn0040931	0.28606	0.41809
FBgn0037902	0.28605	0.418074
FBgn0004838	0.285804	0.417715
FBgn0086855	0.285255	0.416912
FBgn0011291	0.284824	0.416281
FBgn0003612	0.283955	0.415009
FBgn0038046	0.283413	0.414218
FBgn0030054	0.283072	0.413718
FBgn0000043	0.282821	0.413351
FBgn0003430	0.282277	0.412555
FBgn0033378	0.282216	0.412466
FBgn0002593	0.280089	0.409355
FBgn0011225	0.279808	0.408944
FBgn0011227	0.279758	0.40887
FBgn0037700	0.279521	0.408524
FBgn0003517	0.279395	0.40834
FBgn0039509	0.278381	0.406856
FBgn0039358	0.278073	0.406406
FBgn0041191	0.277801	0.406007
FBgn0011710	0.277603	0.405717
FBgn0036309	0.277364	0.405368
FBgn0038808	0.27729	0.405261
FBgn0035675	0.277206	0.405137
FBgn0010352	0.277104	0.404988
FBgn0004103	0.276925	0.404726
FBgn0027779	0.27659	0.404237
FBgn0034646	0.276294	0.403803
FBgn0032101	0.276126	0.403557
FBgn0002783	0.276099	0.403518
FBgn0042112	0.275563	0.402734
FBgn0033929	0.275206	0.402211
FBgn0028970	0.275202	0.402206
FBgn0003300	0.275079	0.402025
FBgn0030468	0.275062	0.402001
FBgn0000405	0.275033	0.401958
FBgn0043884	0.2744	0.401032
FBgn0003346	0.274076	0.400558
FBgn0001280	0.273678	0.399976
FBgn0037834	0.273535	0.399767
FBgn0038065	0.273533	0.399765
FBgn0039136	0.273512	0.399733
FBgn0033691	0.272531	0.398299
FBgn0010342	0.272489	0.398237
FBgn0000588	0.272333	0.398009
FBgn0038876	0.272301	0.397962
FBgn0034443	0.271773	0.39719
FBgn0035370	0.27099	0.396045
FBgn0035237	0.270963	0.396005
FBgn0042134	0.270359	0.395121
FBgn0010078	0.269918	0.394476
FBgn0039163	0.269813	0.394322
FBgn0038578	0.269577	0.393977
FBgn0003310	0.269404	0.393724
FBgn0010198	0.269077	0.393245
FBgn0036173	0.268884	0.392964
FBgn0039590	0.26875	0.392767
FBgn0004449	0.26779	0.391363
FBgn0000163	0.267669	0.391187
FBgn0045866	0.267456	0.390875
FBgn0051155	0.26724	0.390558
FBgn0039488	0.266868	0.390014
FBgn0019936	0.26678	0.389885
FBgn0010341	0.266147	0.388959
FBgn0030658	0.265884	0.388575
FBgn0028969	0.264785	0.386968
FBgn0030719	0.264756	0.386925
FBgn0001168	0.264654	0.386776
FBgn0034314	0.264217	0.386136
FBgn0013753	0.264128	0.386006
FBgn0029867	0.263922	0.385705
FBgn0032420	0.263434	0.384991
FBgn0010772	0.262401	0.383479
FBgn0013325	0.262104	0.383046
FBgn0013343	0.261311	0.381886
FBgn0039505	0.261204	0.381728
FBgn0034432	0.260073	0.380074
FBgn0030806	0.25975	0.379602
FBgn0020238	0.25925	0.37887
FBgn0036341	0.259209	0.378811
FBgn0040929	0.259162	0.378742
FBgn0004379	0.259062	0.378596
FBgn0037020	0.25881	0.378227
FBgn0044511	0.258757	0.378149
FBgn0025455	0.258321	0.377511
FBgn0030520	0.257929	0.376938
FBgn0033636	0.25766	0.376544
FBgn0027057	0.257377	0.376131
FBgn0001105	0.255554	0.373463
FBgn0034118	0.255475	0.373348
FBgn0003371	0.25533	0.373135
FBgn0052708	0.255121	0.372831
FBgn0010282	0.254621	0.372099
FBgn0085408	0.253275	0.370129
FBgn0033480	0.252538	0.369051
FBgn0000370	0.25168	0.367796
FBgn0051716	0.251079	0.366917
FBgn0030480	0.250882	0.366629
FBgn0034180	0.250849	0.366581
FBgn0040273	0.25064	0.366276
FBgn0004373	0.250571	0.366175
FBgn0036643	0.250404	0.36593
FBgn0024555	0.250088	0.365468
FBgn0033100	0.249879	0.365162
FBgn0030151	0.249853	0.365124
FBgn0035390	0.24958	0.364724
FBgn0015509	0.249173	0.36413
FBgn0039929	0.249062	0.363966
FBgn0000629	0.248982	0.363849
FBgn0033987	0.248415	0.36302
FBgn0030584	0.247946	0.362335
FBgn0039532	0.247196	0.361237
FBgn0011284	0.247054	0.36103
FBgn0035271	0.246839	0.360716
FBgn0033526	0.246622	0.360398
FBgn0010488	0.245897	0.359337
FBgn0021979	0.24587	0.359298
FBgn0003141	0.245593	0.358892
FBgn0053002	0.245506	0.358766
FBgn0039626	0.2453	0.358464
FBgn0038307	0.245197	0.358313
FBgn0039710	0.245103	0.358175
FBgn0035272	0.245028	0.358066
FBgn0013981	0.244584	0.357416
FBgn0051158	0.244114	0.356728
FBgn0015031	0.243871	0.356373
FBgn0033233	0.243769	0.356224
FBgn0030328	0.243512	0.355849
FBgn0030657	0.243248	0.355462
FBgn0030329	0.242622	0.354547
FBgn0064225	0.242544	0.354433
FBgn0001218	0.242348	0.354146
FBgn0031260	0.242187	0.35391
FBgn0000273	0.24218	0.353899
FBgn0010287	0.24206	0.353724
FBgn0034504	0.241944	0.353555
FBgn0038389	0.241861	0.353433
FBgn0013334	0.24158	0.353023
FBgn0038673	0.240885	0.352006
FBgn0031437	0.24068	0.351706
FBgn0038235	0.240392	0.351284
FBgn0032811	0.240309	0.351163
FBgn0033901	0.240122	0.350889
FBgn0019890	0.239815	0.350441
FBgn0011666	0.239383	0.349808
FBgn0003205	0.239112	0.349412
FBgn0035526	0.238669	0.348763
FBgn0040907	0.23854	0.348575
FBgn0041205	0.238354	0.348303
FBgn0033886	0.238238	0.348134
FBgn0003741	0.238195	0.34807
FBgn0037660	0.237999	0.347784
FBgn0000180	0.237888	0.347621
FBgn0000307	0.237797	0.347489
FBgn0005624	0.237601	0.347202
FBgn0001123	0.236847	0.346099
FBgn0010421	0.236845	0.346096
FBgn0026261	0.236659	0.345823
FBgn0016696	0.236597	0.345732
FBgn0020255	0.235992	0.344847
FBgn0032822	0.235866	0.344664
FBgn0003520	0.235571	0.344231
FBgn0017550	0.235536	0.34418
FBgn0026089	0.235521	0.344158
FBgn0000541	0.235448	0.344052
FBgn0027095	0.235325	0.343872
FBgn0005649	0.234927	0.34329
FBgn0004362	0.234704	0.342964
FBgn0034243	0.234441	0.342578
FBgn0052685	0.234046	0.342001
FBgn0035850	0.233962	0.341879
FBgn0002932	0.233906	0.341796
FBgn0002431	0.233782	0.341615
FBgn0035793	0.233541	0.341262
FBgn0086686	0.233165	0.340712
FBgn0030870	0.232591	0.339873
FBgn0030196	0.232466	0.33969
FBgn0010228	0.232444	0.339658
FBgn0034537	0.232043	0.339071
FBgn0016041	0.231756	0.338651
FBgn0033208	0.23147	0.338233
FBgn0001994	0.230574	0.336922
FBgn0030352	0.230342	0.336582
FBgn0028582	0.229513	0.33537
FBgn0000412	0.229392	0.335192
FBgn0030292	0.229033	0.334668
FBgn0040623	0.228914	0.334494
FBgn0033029	0.228751	0.334255
FBgn0039302	0.228593	0.334024
FBgn0033349	0.228452	0.333818
FBgn0039713	0.228406	0.33375
FBgn0052177	0.228122	0.333335
FBgn0082582	0.227999	0.333155
FBgn0003447	0.227896	0.333005
FBgn0015756	0.227532	0.332471
FBgn0025558	0.226574	0.331071
FBgn0031607	0.226392	0.330805
FBgn0010452	0.226301	0.330671
FBgn0038400	0.226281	0.330643
FBgn0011290	0.226236	0.330576
FBgn0001215	0.226059	0.330317
FBgn0029907	0.225792	0.329927
FBgn0036004	0.225653	0.329723
FBgn0035388	0.225288	0.32919
FBgn0001235	0.225227	0.329101
FBgn0051908	0.224958	0.328706
FBgn0037443	0.224038	0.327361
FBgn0000283	0.22396	0.327247
FBgn0039350	0.223555	0.326654
FBgn0022238	0.223201	0.326136
FBgn0062442	0.223162	0.326079
FBgn0020251	0.223155	0.32607
FBgn0039301	0.223131	0.326034
FBgn0037363	0.222518	0.325138
FBgn0034744	0.222492	0.3251
FBgn0041184	0.222328	0.324859
FBgn0038868	0.222219	0.324699
FBgn0040010	0.221818	0.324114
FBgn0051301	0.221475	0.323611
FBgn0020887	0.221213	0.323228
FBgn0000150	0.220413	0.322058
FBgn0036534	0.22018	0.321717
FBgn0003890	0.220088	0.321583
FBgn0034086	0.219702	0.321017
FBgn0260400	0.219317	0.320455
FBgn0034422	0.219121	0.320169
FBgn0000662	0.219073	0.320098
FBgn0011715	0.218769	0.319653
FBgn0030057	0.218488	0.319242
FBgn0030434	0.218351	0.319042
FBgn0023522	0.218266	0.318917
FBgn0031309	0.218113	0.318693
FBgn0037094	0.217802	0.318239
FBgn0013770	0.217231	0.317403
FBgn0039066	0.216911	0.316935
FBgn0037007	0.216407	0.316198
FBgn0003862	0.216186	0.315874
FBgn0001995	0.216097	0.315745
FBgn0039305	0.215971	0.31556
FBgn0021776	0.215938	0.315512
FBgn0004107	0.215833	0.315358
FBgn0005322	0.215546	0.314938
FBgn0004050	0.215348	0.314649
FBgn0029006	0.215189	0.314415
FBgn0052446	0.215153	0.314364
FBgn0034240	0.214853	0.313924
FBgn0010909	0.21411	0.312838
FBgn0031190	0.214001	0.312679
FBgn0039403	0.213715	0.31226
FBgn0004907	0.21368	0.312208
FBgn0041186	0.213676	0.312203
FBgn0023509	0.213676	0.312202
FBgn0032050	0.213614	0.312113
FBgn0039019	0.213327	0.311692
FBgn0025109	0.213317	0.311677
FBgn0027603	0.213246	0.311574
FBgn0045073	0.212861	0.311011
FBgn0030571	0.212842	0.310982
FBgn0002945	0.212623	0.310662
FBgn0051109	0.212176	0.310009
FBgn0035016	0.211437	0.308928
FBgn0030749	0.211371	0.308832
FBgn0053229	0.210879	0.308111
FBgn0010113	0.210847	0.308065
FBgn0030060	0.210696	0.307843
FBgn0017457	0.210578	0.307672
FBgn0037533	0.210291	0.307252
FBgn0040660	0.210217	0.307144
FBgn0031590	0.209631	0.306285
FBgn0033810	0.2093	0.305802
FBgn0001139	0.208407	0.304495
FBgn0030092	0.208241	0.304253
FBgn0032725	0.207486	0.303148
FBgn0010333	0.207442	0.303083
FBgn0034242	0.207419	0.303049
FBgn0037351	0.20738	0.302993
FBgn0034503	0.207178	0.302698
FBgn0036277	0.206888	0.302273
FBgn0010417	0.206644	0.301917
FBgn0037011	0.206291	0.3014
FBgn0052856	0.206119	0.301148
FBgn0000289	0.206112	0.301138
FBgn0036035	0.205626	0.300426
FBgn0035763	0.204254	0.298419
FBgn0033688	0.20302	0.296615
FBgn0020496	0.202918	0.296466
FBgn0004656	0.20288	0.296411
FBgn0010825	0.202356	0.295644
FBgn0015024	0.202047	0.295192
FBgn0036733	0.201715	0.294706
FBgn0015903	0.201503	0.294396
FBgn0035318	0.201316	0.294122
FBgn0051855	0.201111	0.293823
FBgn0036998	0.201109	0.29382
FBgn0010314	0.200718	0.293248
FBgn0035088	0.199927	0.292091
FBgn0044826	0.199871	0.292008
FBgn0034091	0.199445	0.291385
FBgn0034447	0.199412	0.291336
FBgn0031663	0.199131	0.290925
FBgn0036623	0.199114	0.2909
FBgn0031321	0.199107	0.290891
FBgn0029882	0.19897	0.290691
FBgn0004237	0.198609	0.290163
FBgn0010638	0.19828	0.28968
FBgn0039802	0.1981	0.289417
FBgn0039732	0.19796	0.289213
FBgn0035110	0.197854	0.289058
FBgn0030813	0.197853	0.289057
FBgn0032454	0.197796	0.288973
FBgn0032979	0.197605	0.288694
FBgn0020392	0.197185	0.288079
FBgn0038183	0.196794	0.287507
FBgn0037330	0.196391	0.286918
FBgn0031951	0.196334	0.286835
FBgn0030529	0.195801	0.286055
FBgn0032293	0.195702	0.285909
FBgn0003002	0.195569	0.285716
FBgn0030239	0.195402	0.28547
FBgn0052280	0.19468	0.284415
FBgn0000083	0.194423	0.284039
FBgn0032305	0.193857	0.283211
FBgn0000617	0.193696	0.282975
FBgn0038803	0.193352	0.282472
FBgn0000578	0.193247	0.282318
FBgn0011016	0.193153	0.282182
FBgn0030720	0.192964	0.281904
FBgn0000250	0.192089	0.280624
FBgn0035906	0.192009	0.280508
FBgn0034877	0.191897	0.280343
FBgn0004456	0.191888	0.28033
FBgn0003274	0.191837	0.280256
FBgn0000071	0.190861	0.278828
FBgn0010226	0.190343	0.278071
FBgn0034893	0.190152	0.277791
FBgn0043010	0.190129	0.277758
FBgn0061200	0.190004	0.277575
FBgn0014010	0.189876	0.277387
FBgn0027101	0.189732	0.277177
FBgn0000318	0.189719	0.277157
FBgn0029903	0.189626	0.277021
FBgn0003165	0.189573	0.276944
FBgn0038369	0.188885	0.275938
FBgn0038830	0.188711	0.275683
FBgn0014011	0.188593	0.275511
FBgn0038049	0.188486	0.275353
FBgn0037538	0.188425	0.275264
FBgn0015602	0.188399	0.275227
FBgn0000229	0.188132	0.274836
FBgn0038608	0.188081	0.274762
FBgn0040080	0.188069	0.274744
FBgn0010288	0.187477	0.273878
FBgn0033741	0.187408	0.273777
FBgn0037378	0.187404	0.273771
FBgn0031390	0.187375	0.273728
FBgn0083940	0.186957	0.273117
FBgn0034606	0.186588	0.272578
FBgn0037843	0.18651	0.272463
FBgn0015513	0.186374	0.272264
FBgn0031603	0.186335	0.272208
FBgn0034488	0.186171	0.271968
FBgn0037551	0.186081	0.271836
FBgn0039555	0.185587	0.271114
FBgn0038474	0.18489	0.270094
FBgn0024234	0.184848	0.270032
FBgn0039930	0.184645	0.269735
FBgn0003731	0.18454	0.269581
FBgn0036990	0.18432	0.269259
FBgn0004687	0.1841	0.268938
FBgn0003942	0.183973	0.268752
FBgn0001086	0.183775	0.268463
FBgn0032034	0.18251	0.266613
FBgn0000463	0.182376	0.266416
FBgn0036396	0.182182	0.266132
FBgn0051390	0.182121	0.266043
FBgn0037061	0.182076	0.265977
FBgn0034577	0.182054	0.265944
FBgn0011747	0.181722	0.265459
FBgn0004066	0.181689	0.265411
FBgn0033551	0.181422	0.26502
FBgn0033842	0.181309	0.264855
FBgn0035107	0.180798	0.264108
FBgn0023212	0.180784	0.264087
FBgn0051460	0.180289	0.263363
FBgn0030864	0.180266	0.263329
FBgn0022343	0.180236	0.263285
FBgn0016034	0.179946	0.262861
FBgn0000575	0.179675	0.262464
FBgn0087035	0.179563	0.262301
FBgn0038877	0.179232	0.261816
FBgn0033191	0.178914	0.261351
FBgn0036844	0.178406	0.260608
FBgn0039835	0.177658	0.259515
FBgn0001185	0.177148	0.258768
FBgn0010750	0.17714	0.258757
FBgn0001276	0.17711	0.258712
FBgn0086605	0.176976	0.258516
FBgn0039259	0.176704	0.258119
FBgn0030082	0.176648	0.258036
FBgn0037555	0.176272	0.257486
FBgn0038535	0.176229	0.257424
FBgn0032014	0.175689	0.256634
FBgn0030311	0.17567	0.256606
FBgn0027504	0.175398	0.256209
FBgn0025809	0.175337	0.256119
FBgn0039757	0.175298	0.256062
FBgn0030851	0.175261	0.256008
FBgn0032000	0.17456	0.254983
FBgn0086371	0.174505	0.254902
FBgn0052428	0.174408	0.254761
FBgn0015288	0.174339	0.254659
FBgn0010339	0.174216	0.254478
FBgn0036005	0.174082	0.254283
FBgn0004179	0.173882	0.25399
FBgn0034345	0.173876	0.253982
FBgn0036556	0.173789	0.253855
FBgn0002121	0.17356	0.253519
FBgn0041174	0.173285	0.253117
FBgn0004395	0.172959	0.25264
FBgn0052202	0.172906	0.252564
FBgn0014037	0.172885	0.252532
FBgn0086895	0.172622	0.252147
FBgn0036828	0.172389	0.251807
FBgn0035253	0.17217	0.251487
FBgn0003514	0.171749	0.25087
FBgn0037213	0.171119	0.249949
FBgn0036111	0.170952	0.249705
FBgn0000140	0.170481	0.249015
FBgn0033400	0.170414	0.248917
FBgn0053116	0.170365	0.248846
FBgn0033062	0.17027	0.248706
FBgn0032518	0.169088	0.246977
FBgn0000520	0.168929	0.246745
FBgn0026326	0.16889	0.246689
FBgn0002552	0.168752	0.246486
FBgn0040285	0.168512	0.246135
FBgn0086908	0.168507	0.246128
FBgn0026090	0.16841	0.245986
FBgn0020618	0.16823	0.245722
FBgn0010438	0.168207	0.24569
FBgn0036239	0.168069	0.245487
FBgn0038923	0.167961	0.245329
FBgn0033028	0.167947	0.245309
FBgn0026400	0.16777	0.245049
FBgn0031740	0.167629	0.244843
FBgn0040346	0.167384	0.244485
FBgn0051365	0.167382	0.244482
FBgn0036813	0.166851	0.243705
FBgn0000316	0.166846	0.243698
FBgn0038666	0.166799	0.24363
FBgn0053052	0.166747	0.243554
FBgn0039767	0.166672	0.243444
FBgn0001122	0.166544	0.243256
FBgn0039306	0.166462	0.243136
FBgn0001124	0.166188	0.242735
FBgn0000404	0.166143	0.242669
FBgn0010313	0.166088	0.242589
FBgn0010382	0.166037	0.242515
FBgn0010220	0.166	0.24246
FBgn0041775	0.165851	0.242242
FBgn0030692	0.165757	0.242105
FBgn0034181	0.165732	0.242068
FBgn0052767	0.165603	0.24188
FBgn0036661	0.165286	0.241416
FBgn0011481	0.165195	0.241283
FBgn0000667	0.165001	0.240999
FBgn0051211	0.164941	0.240911
FBgn0010770	0.164825	0.240742
FBgn0038244	0.164266	0.239924
FBgn0039141	0.163795	0.239235
FBgn0030003	0.163532	0.23885
FBgn0004861	0.162099	0.236754
FBgn0036141	0.161951	0.236537
FBgn0004811	0.161603	0.236028
FBgn0029094	0.161556	0.23596
FBgn0039270	0.161467	0.23583
FBgn0019949	0.161101	0.235294
FBgn0039252	0.160949	0.235072
FBgn0034310	0.160767	0.234805
FBgn0039857	0.160665	0.234656
FBgn0011640	0.159848	0.233461
FBgn0026088	0.159816	0.233414
FBgn0026160	0.159805	0.233399
FBgn0015221	0.15968	0.233215
FBgn0031118	0.159469	0.232907
FBgn0040020	0.159141	0.232427
FBgn0024277	0.159131	0.232413
FBgn0000046	0.15909	0.232352
FBgn0031604	0.158758	0.231866
FBgn0005696	0.15845	0.231416
FBgn0036580	0.158226	0.231089
FBgn0033089	0.158018	0.230784
FBgn0003261	0.15763	0.230217
FBgn0040372	0.157071	0.229399
FBgn0003334	0.157052	0.229371
FBgn0087021	0.157029	0.229338
FBgn0039858	0.156919	0.229177
FBgn0026061	0.156877	0.229115
FBgn0035644	0.156754	0.228935
FBgn0040366	0.156598	0.228707
FBgn0010416	0.156426	0.228456
FBgn0036762	0.156279	0.22824
FBgn0051992	0.156132	0.228025
FBgn0034743	0.155948	0.227756
FBgn0033972	0.155718	0.22742
FBgn0046704	0.155489	0.227085
FBgn0000543	0.155004	0.226376
FBgn0014020	0.155001	0.226371
FBgn0004108	0.154834	0.226127
FBgn0010762	0.154446	0.225558
FBgn0035422	0.154399	0.22549
FBgn0031078	0.15433	0.225389
FBgn0015391	0.154311	0.225361
FBgn0030318	0.15417	0.225156
FBgn0037087	0.154024	0.224941
FBgn0032250	0.153974	0.224869
FBgn0030090	0.153967	0.224858
FBgn0030321	0.153806	0.224623
FBgn0001404	0.153803	0.224619
FBgn0003716	0.153663	0.224413
FBgn0031062	0.153562	0.224266
FBgn0086683	0.153542	0.224237
FBgn0030786	0.153034	0.223494
FBgn0040230	0.152428	0.222607
FBgn0042132	0.152349	0.222491
FBgn0050389	0.15227	0.222376
FBgn0086444	0.15223	0.222317
FBgn0031310	0.152125	0.222164
FBgn0001330	0.151944	0.221898
FBgn0037723	0.151152	0.22074
FBgn0025777	0.151146	0.220732
FBgn0033381	0.150725	0.220116
FBgn0024330	0.15056	0.219875
FBgn0039965	0.150512	0.219804
FBgn0010238	0.150505	0.219793
FBgn0003977	0.149514	0.218344
FBgn0034215	0.148907	0.217456
FBgn0037930	0.148666	0.217103
FBgn0039099	0.148282	0.216542
FBgn0036761	0.14812	0.216304
FBgn0037360	0.148028	0.21617
FBgn0030611	0.147494	0.21539
FBgn0010100	0.147356	0.215187
FBgn0039406	0.14692	0.21455
FBgn0020620	0.146798	0.214372
FBgn0041094	0.146683	0.214203
FBgn0033357	0.145817	0.212936
FBgn0004644	0.145412	0.212343
FBgn0024804	0.145197	0.212029
FBgn0000181	0.144902	0.211597
FBgn0014366	0.144862	0.211538
FBgn0034570	0.144742	0.211363
FBgn0037106	0.144478	0.210977
FBgn0030034	0.144437	0.210917
FBgn0031044	0.144389	0.210847
FBgn0027602	0.144306	0.210726
FBgn0034650	0.143861	0.210075
FBgn0050359	0.143765	0.209934
FBgn0000536	0.143394	0.209392
FBgn0020304	0.14326	0.209196
FBgn0011305	0.143121	0.208993
FBgn0000577	0.142835	0.208573
FBgn0030878	0.142827	0.208563
FBgn0000723	0.142754	0.208455
FBgn0005683	0.142752	0.208453
FBgn0000352	0.142685	0.208354
FBgn0036335	0.142659	0.208316
FBgn0029996	0.142548	0.208154
FBgn0036376	0.142519	0.208112
FBgn0004959	0.142418	0.207964
FBgn0030067	0.142192	0.207633
FBgn0036500	0.14209	0.207483
FBgn0040068	0.14205	0.207425
FBgn0020279	0.141826	0.207098
FBgn0039360	0.141109	0.20605
FBgn0030631	0.140852	0.205674
FBgn0035909	0.14083	0.20564
FBgn0036929	0.140645	0.20537
FBgn0031633	0.140619	0.205332
FBgn0039907	0.140497	0.205153
FBgn0024992	0.140126	0.204612
FBgn0032818	0.140052	0.204502
FBgn0030026	0.139846	0.204202
FBgn0014009	0.139662	0.203932
FBgn0051373	0.139447	0.203618
FBgn0032702	0.139068	0.203063
FBgn0001087	0.138965	0.202913
FBgn0051363	0.138915	0.20284
FBgn0037777	0.138829	0.202714
FBgn0032229	0.138433	0.202134
FBgn0034232	0.138322	0.201972
FBgn0028683	0.138082	0.201621
FBgn0036263	0.138011	0.201517
FBgn0050105	0.137941	0.201414
FBgn0030411	0.137805	0.201215
FBgn0038016	0.137426	0.200661
FBgn0035997	0.137368	0.200576
FBgn0036090	0.137355	0.200557
FBgn0030365	0.137345	0.200542
FBgn0032925	0.137301	0.200478
FBgn0000411	0.136571	0.19941
FBgn0033605	0.136443	0.199223
FBgn0001222	0.136381	0.199132
FBgn0038234	0.136322	0.199047
FBgn0039172	0.13629	0.199
FBgn0037374	0.136197	0.198864
FBgn0035725	0.135963	0.198522
FBgn0015929	0.135824	0.198317
FBgn0261396	0.1358	0.198282
FBgn0000319	0.135767	0.198235
FBgn0039633	0.135737	0.19819
FBgn0002031	0.135707	0.198147
FBgn0032421	0.135656	0.198072
FBgn0000658	0.135367	0.197649
FBgn0040340	0.135243	0.197468
FBgn0039705	0.135168	0.197358
FBgn0032812	0.135054	0.197192
FBgn0014857	0.134987	0.197093
FBgn0032750	0.134842	0.196882
FBgn0030507	0.134842	0.196882
FBgn0001220	0.134836	0.196872
FBgn0036340	0.134249	0.196013
FBgn0001961	0.134144	0.19586
FBgn0038586	0.134113	0.195815
FBgn0035853	0.13402	0.195679
FBgn0000414	0.133936	0.195555
FBgn0016701	0.133574	0.195027
FBgn0032053	0.133556	0.195
FBgn0037709	0.133412	0.194789
FBgn0033859	0.133354	0.194704
FBgn0011202	0.133311	0.194641
FBgn0037749	0.133168	0.194432
FBgn0003567	0.133149	0.194405
FBgn0038396	0.13306	0.194274
FBgn0033434	0.132998	0.194184
FBgn0033669	0.132871	0.193998
FBgn0030996	0.132542	0.193516
FBgn0033159	0.132495	0.193448
FBgn0036565	0.132488	0.193438
FBgn0086361	0.132467	0.193406
FBgn0086384	0.132354	0.193241
FBgn0031868	0.132259	0.193102
FBgn0034138	0.131991	0.192711
FBgn0086558	0.131497	0.191989
FBgn0004795	0.131393	0.191837
FBgn0002985	0.130994	0.191252
FBgn0085188	0.130955	0.191195
FBgn0038319	0.130876	0.19108
FBgn0033845	0.130862	0.191059
FBgn0015331	0.130848	0.191038
FBgn0000490	0.130837	0.191023
FBgn0039955	0.130764	0.190916
FBgn0004368	0.130429	0.190426
FBgn0022224	0.130395	0.190375
FBgn0000109	0.130164	0.190038
FBgn0004606	0.129989	0.189782
FBgn0035520	0.129912	0.189669
FBgn0030500	0.129578	0.189181
FBgn0035356	0.129349	0.188846
FBgn0013305	0.129296	0.188768
FBgn0029800	0.129291	0.188761
FBgn0002466	0.129176	0.188593
FBgn0086613	0.128882	0.188163
FBgn0036484	0.128669	0.187851
FBgn0002989	0.128367	0.187409
FBgn0039831	0.128342	0.187373
FBgn0003714	0.128322	0.187343
FBgn0002354	0.128203	0.187169
FBgn0033038	0.128002	0.186875
FBgn0001981	0.127957	0.186809
FBgn0034335	0.127812	0.186597
FBgn0039269	0.127572	0.186247
FBgn0038100	0.12756	0.186229
FBgn0038312	0.127548	0.186211
FBgn0030410	0.127474	0.186103
FBgn0000119	0.127362	0.185939
FBgn0010269	0.127219	0.18573
FBgn0026079	0.127156	0.185638
FBgn0037669	0.126889	0.185248
FBgn0000449	0.126698	0.184968
FBgn0034433	0.126682	0.184944
FBgn0030659	0.126676	0.184935
FBgn0040512	0.126674	0.184933
FBgn0036007	0.126531	0.184724
FBgn0016122	0.126474	0.18464
FBgn0031191	0.12647	0.184634
FBgn0037027	0.126412	0.18455
FBgn0011224	0.126377	0.184498
FBgn0036334	0.126157	0.184177
FBgn0035811	0.126154	0.184173
FBgn0000014	0.126008	0.183959
FBgn0020388	0.12594	0.183858
FBgn0050089	0.12589	0.183786
FBgn0061198	0.125749	0.18358
FBgn0086898	0.125736	0.18356
FBgn0039205	0.125685	0.183486
FBgn0034849	0.125631	0.183408
FBgn0003444	0.125581	0.183335
FBgn0029959	0.125471	0.183173
FBgn0050390	0.125336	0.182975
FBgn0002905	0.125285	0.182901
FBgn0027066	0.125269	0.182877
FBgn0002542	0.125187	0.182757
FBgn0035425	0.125084	0.182607
FBgn0030018	0.125062	0.182575
FBgn0040022	0.125028	0.182525
FBgn0052343	0.124967	0.182435
FBgn0050476	0.124745	0.182111
FBgn0039537	0.124563	0.181845
FBgn0051875	0.124546	0.18182
FBgn0051712	0.124246	0.181381
FBgn0011217	0.124024	0.181057
FBgn0039632	0.124019	0.181049
FBgn0020655	0.123902	0.180877
FBgn0041210	0.123871	0.180833
FBgn0004364	0.123678	0.180551
FBgn0000259	0.123628	0.180477
FBgn0030990	0.123577	0.180402
FBgn0029529	0.123507	0.1803
FBgn0004052	0.123488	0.180272
FBgn0010215	0.123415	0.180166
FBgn0034049	0.123268	0.179951
FBgn0000117	0.123182	0.179825
FBgn0004567	0.123176	0.179815
FBgn0022097	0.123121	0.179735
FBgn0040212	0.123095	0.179698
FBgn0024807	0.122804	0.179271
FBgn0037705	0.122764	0.179213
FBgn0000308	0.122717	0.179145
FBgn0003969	0.122534	0.178877
FBgn0027108	0.122503	0.178831
FBgn0039943	0.122422	0.178713
FBgn0039160	0.122087	0.178223
FBgn0003559	0.122039	0.178153
FBgn0031047	0.121959	0.178036
FBgn0040208	0.121946	0.178016
FBgn0037707	0.12184	0.177862
FBgn0030403	0.121629	0.177553
FBgn0010300	0.121485	0.177343
FBgn0036702	0.121466	0.177314
FBgn0036505	0.121388	0.177201
FBgn0050077	0.121114	0.176799
FBgn0086687	0.121103	0.176784
FBgn0003042	0.120913	0.176506
FBgn0028402	0.120843	0.176404
FBgn0040232	0.12067	0.17615
FBgn0033737	0.120628	0.176088
FBgn0003326	0.12026	0.17555
FBgn0020278	0.120092	0.175304
FBgn0004401	0.120006	0.175179
FBgn0011606	0.11996	0.175111
FBgn0032261	0.11975	0.174804
FBgn0024509	0.119623	0.174619
FBgn0036337	0.119613	0.174604
FBgn0036207	0.119569	0.174539
FBgn0039829	0.119483	0.174414
FBgn0035334	0.119431	0.174338
FBgn0001079	0.11932	0.174175
FBgn0051223	0.119229	0.174042
FBgn0036804	0.119146	0.173921
FBgn0033247	0.119145	0.173919
FBgn0030674	0.119117	0.173878
FBgn0035044	0.119107	0.173863
FBgn0016131	0.118954	0.17364
FBgn0040007	0.118596	0.173116
FBgn0001142	0.118469	0.172931
FBgn0032346	0.118439	0.172886
FBgn0001990	0.118236	0.172589
FBgn0003896	0.118058	0.172328
FBgn0031673	0.118053	0.172321
FBgn0038454	0.118005	0.172252
FBgn0037010	0.117758	0.17189
FBgn0036460	0.117393	0.171356
FBgn0039204	0.117367	0.171318
FBgn0067864	0.11711	0.170942
FBgn0030963	0.117092	0.170916
FBgn0030788	0.11693	0.170679
FBgn0050373	0.116887	0.170615
FBgn0030671	0.11685	0.170561
FBgn0032005	0.116685	0.17032
FBgn0052533	0.116614	0.170217
FBgn0037121	0.116555	0.170131
FBgn0044324	0.11639	0.169889
FBgn0085430	0.116372	0.169862
FBgn0032906	0.116314	0.169778
FBgn0051453	0.116183	0.169586
FBgn0038577	0.116123	0.169498
FBgn0033912	0.115957	0.169256
FBgn0031392	0.11573	0.168923
FBgn0032703	0.115635	0.168785
FBgn0039283	0.115449	0.168513
FBgn0028662	0.115416	0.168464
FBgn0030510	0.115297	0.16829
FBgn0005777	0.115191	0.168136
FBgn0033453	0.114953	0.167786
FBgn0003345	0.11495	0.167782
FBgn0033607	0.114928	0.16775
FBgn0020386	0.114713	0.167436
FBgn0020236	0.11463	0.167314
FBgn0025800	0.114478	0.167092
FBgn0026015	0.114421	0.167009
FBgn0029709	0.114421	0.167008
FBgn0029002	0.114274	0.166793
FBgn0250843	0.114199	0.166684
FBgn0031357	0.114196	0.166679
FBgn0031057	0.114151	0.166614
FBgn0037262	0.113853	0.166177
FBgn0001169	0.113779	0.166069
FBgn0030053	0.113675	0.165917
FBgn0039869	0.113605	0.165815
FBgn0053505	0.113521	0.165692
FBgn0035235	0.113427	0.165555
FBgn0002183	0.11342	0.165544
FBgn0033690	0.113348	0.165439
FBgn0020389	0.113336	0.165422
FBgn0043457	0.113312	0.165386
FBgn0038722	0.113308	0.16538
FBgn0044871	0.113277	0.165336
FBgn0020621	0.113262	0.165313
FBgn0038387	0.113066	0.165027
FBgn0028500	0.113048	0.165
FBgn0014861	0.113022	0.164962
FBgn0038272	0.112904	0.164789
FBgn0260985	0.112837	0.164692
FBgn0032230	0.11283	0.164681
FBgn0029992	0.112818	0.164663
FBgn0015546	0.112756	0.164572
FBgn0000499	0.112713	0.164509
FBgn0026076	0.112695	0.164484
FBgn0030006	0.112593	0.164335
FBgn0038110	0.112459	0.164139
FBgn0033507	0.111991	0.163454
FBgn0020257	0.111899	0.163319
FBgn0011737	0.111876	0.163286
FBgn0051957	0.11153	0.16278
FBgn0046114	0.111476	0.1627
FBgn0035082	0.111352	0.16252
FBgn0015222	0.111339	0.1625
FBgn0012058	0.111332	0.16249
FBgn0053051	0.111331	0.162488
FBgn0034430	0.111097	0.162146
FBgn0027615	0.110588	0.161401
FBgn0030552	0.110555	0.161354
FBgn0025626	0.11054	0.161331
FBgn0033855	0.110497	0.161268
FBgn0030522	0.110295	0.160973
FBgn0030177	0.110236	0.160887
FBgn0030121	0.110044	0.160605
FBgn0014343	0.109807	0.160259
FBgn0003087	0.109557	0.159894
FBgn0015025	0.109505	0.159817
FBgn0030301	0.109381	0.159636
FBgn0000173	0.109131	0.15927
FBgn0002723	0.10903	0.159123
FBgn0000579	0.108993	0.159068
FBgn0030855	0.10888	0.158903
FBgn0000228	0.108862	0.158876
FBgn0030268	0.10883	0.15883
FBgn0038108	0.108808	0.158798
FBgn0041111	0.1088	0.158786
FBgn0035047	0.108773	0.158746
FBgn0033032	0.108695	0.158633
FBgn0010379	0.108689	0.158624
FBgn0003944	0.108674	0.158602
FBgn0087008	0.108673	0.158601
FBgn0014024	0.108569	0.158448
FBgn0031231	0.108551	0.158422
FBgn0026402	0.108459	0.158287
FBgn0027291	0.108382	0.158174
FBgn0003124	0.108161	0.157852
FBgn0035772	0.107818	0.15735
FBgn0001291	0.107816	0.157347
FBgn0260462	0.107813	0.157342
FBgn0033808	0.107778	0.157291
FBgn0034523	0.107773	0.157284
FBgn0051450	0.10776	0.157265
FBgn0046301	0.107622	0.157062
FBgn0085442	0.107591	0.157018
FBgn0011020	0.107587	0.157012
FBgn0036059	0.107577	0.156997
FBgn0036449	0.107523	0.156917
FBgn0031871	0.107346	0.15666
FBgn0038662	0.107156	0.156381
FBgn0037074	0.106881	0.155978
FBgn0040477	0.106759	0.155801
FBgn0004646	0.106631	0.155613
FBgn0033638	0.106608	0.15558
FBgn0039923	0.106494	0.155413
FBgn0005642	0.106356	0.155211
FBgn0025815	0.106108	0.154848
FBgn0033382	0.106074	0.154798
FBgn0002878	0.105965	0.154639
FBgn0033550	0.10575	0.154325
FBgn0003557	0.105709	0.154264
FBgn0030743	0.105637	0.154159
FBgn0020510	0.105628	0.154146
FBgn0035722	0.105624	0.154141
FBgn0000097	0.105466	0.153909
FBgn0031635	0.105407	0.153823
FBgn0011661	0.105407	0.153822
FBgn0000147	0.105164	0.153467
FBgn0030504	0.105159	0.153459
FBgn0030063	0.105029	0.15327
FBgn0028692	0.104938	0.153137
FBgn0030189	0.104871	0.153038
FBgn0037877	0.104853	0.153013
FBgn0030628	0.104825	0.152971
FBgn0032298	0.10477	0.152891
FBgn0028992	0.104763	0.15288
FBgn0003292	0.104702	0.152792
FBgn0038233	0.104622	0.152674
FBgn0015520	0.104619	0.15267
FBgn0002778	0.104578	0.15261
FBgn0040075	0.104523	0.15253
FBgn0029093	0.104504	0.152501
FBgn0031434	0.104498	0.152494
FBgn0032732	0.104461	0.152439
FBgn0036020	0.104406	0.152358
FBgn0022959	0.104137	0.151965
FBgn0035209	0.104084	0.151888
FBgn0036030	0.104016	0.151788
FBgn0002521	0.103972	0.151724
FBgn0015521	0.103823	0.151505
FBgn0035993	0.103812	0.15149
FBgn0053113	0.103785	0.151449
FBgn0039213	0.103758	0.15141
FBgn0034968	0.103743	0.151388
FBgn0037613	0.1037	0.151325
FBgn0028507	0.103602	0.151182
FBgn0032509	0.103595	0.151173
FBgn0051352	0.103527	0.151072
FBgn0011770	0.10352	0.151063
FBgn0029820	0.103422	0.150919
FBgn0003044	0.103348	0.15081
FBgn0038989	0.103287	0.150721
FBgn0034399	0.103276	0.150705
FBgn0003082	0.103069	0.150402
FBgn0000565	0.102855	0.15009
FBgn0002645	0.102793	0.149999
FBgn0050094	0.102662	0.149808
FBgn0010406	0.102645	0.149783
FBgn0037369	0.102601	0.149717
FBgn0029897	0.102591	0.149703
FBgn0031772	0.102586	0.149696
FBgn0033735	0.102586	0.149696
FBgn0051156	0.102444	0.149489
FBgn0031909	0.102357	0.149362
FBgn0029502	0.102243	0.149194
FBgn0001133	0.101891	0.14868
FBgn0022288	0.101601	0.148256
FBgn0031319	0.101457	0.148044
FBgn0000547	0.101316	0.147838
FBgn0003254	0.101312	0.147833
FBgn0037093	0.101276	0.14778
FBgn0033539	0.101233	0.147717
FBgn0003392	0.10123	0.147713
FBgn0033483	0.101079	0.147492
FBgn0004509	0.100894	0.147221
FBgn0030892	0.100887	0.147211
FBgn0051357	0.100849	0.147155
FBgn0031708	0.100799	0.147082
FBgn0033088	0.100716	0.146961
FBgn0011818	0.100706	0.146945
FBgn0037747	0.100702	0.14694
FBgn0004574	0.100698	0.146934
FBgn0038590	0.100653	0.146868
FBgn0032482	0.100483	0.14662
FBgn0027783	0.100327	0.146391
FBgn0002566	0.100266	0.146302
FBgn0036301	0.100076	0.146025
FBgn0004569	0.100044	0.145978
FBgn0036666	0.0998828	0.145742
FBgn0022699	0.0998482	0.145691
FBgn0000257	0.0996331	0.145376
FBgn0042111	0.0995386	0.145238
FBgn0030834	0.0992507	0.144817
FBgn0030294	0.0991601	0.144684
FBgn0030572	0.0990635	0.144543
FBgn0034087	0.0989819	0.144424
FBgn0030872	0.098975	0.144414
FBgn0030474	0.098972	0.144409
FBgn0030717	0.0989328	0.144352
FBgn0037770	0.0988692	0.144259
FBgn0031479	0.0986843	0.143988
FBgn0039056	0.098651	0.14394
FBgn0050291	0.098644	0.143929
FBgn0046687	0.0985517	0.143794
FBgn0037244	0.0984754	0.143683
FBgn0030460	0.0984628	0.143664
FBgn0039381	0.0984595	0.14366
FBgn0259113	0.0984036	0.143578
FBgn0029688	0.0983867	0.143553
FBgn0260940	0.0983861	0.143552
FBgn0052056	0.098341	0.143486
FBgn0030521	0.0983307	0.143471
FBgn0011708	0.0982609	0.143369
FBgn0039711	0.0981707	0.143237
FBgn0034066	0.0981048	0.143141
FBgn0030701	0.0980861	0.143113
FBgn0034109	0.0979865	0.142968
FBgn0034938	0.0979584	0.142926
FBgn0039449	0.0978857	0.14282
FBgn0043455	0.0977241	0.142584
FBgn0030346	0.0976363	0.142455
FBgn0050410	0.0975914	0.14239
FBgn0004655	0.097561	0.142345
FBgn0034727	0.0973454	0.14203
FBgn0010583	0.097339	0.14202
FBgn0001189	0.0973256	0.142001
FBgn0030660	0.0973051	0.141971
FBgn0039212	0.0973042	0.141969
FBgn0036805	0.0970947	0.141663
FBgn0039638	0.0970331	0.141573
FBgn0029522	0.096981	0.141497
FBgn0085484	0.096896	0.141372
FBgn0051715	0.0968638	0.141325
FBgn0029666	0.0968245	0.141268
FBgn0000261	0.0967421	0.141147
FBgn0024920	0.0965028	0.140797
FBgn0003145	0.0964612	0.140736
FBgn0037670	0.0964157	0.14067
FBgn0034933	0.0964137	0.140667
FBgn0001206	0.0963922	0.140635
FBgn0043012	0.0961057	0.140216
FBgn0036405	0.0960973	0.140204
FBgn0033375	0.0960192	0.14009
FBgn0005672	0.0960091	0.140075
FBgn0035807	0.0959982	0.140059
FBgn0037044	0.0959917	0.140049
FBgn0000711	0.0959908	0.140048
FBgn0031115	0.0959523	0.139992
FBgn0033915	0.0958613	0.139859
FBgn0061469	0.0957712	0.139727
FBgn0000286	0.095607	0.139487
FBgn0042092	0.0955793	0.139446
FBgn0036848	0.0955783	0.139445
FBgn0011766	0.0955606	0.139419
FBgn0004901	0.0954587	0.13927
FBgn0031093	0.0954542	0.139263
FBgn0004837	0.0954221	0.139216
FBgn0036641	0.0953896	0.139169
FBgn0036402	0.0952475	0.138961
FBgn0037746	0.0949127	0.138471
FBgn0034058	0.0948044	0.138313
FBgn0004363	0.094786	0.138286
FBgn0039566	0.0947846	0.138284
FBgn0031098	0.094744	0.138224
FBgn0038855	0.0946928	0.138149
FBgn0031403	0.0946767	0.138126
FBgn0039402	0.0946229	0.138047
FBgn0004380	0.0945602	0.137955
FBgn0031608	0.0945067	0.137877
FBgn0039188	0.0944988	0.137866
FBgn0033672	0.0944628	0.137813
FBgn0013531	0.0944186	0.137748
FBgn0003206	0.0942682	0.137528
FBgn0010398	0.0942503	0.137502
FBgn0010194	0.0941946	0.137421
FBgn0000447	0.0941301	0.137326
FBgn0033739	0.0940648	0.137231
FBgn0030731	0.0940495	0.137208
FBgn0086356	0.0939561	0.137072
FBgn0039870	0.0939512	0.137065
FBgn0040751	0.0937373	0.136752
FBgn0037874	0.093657	0.136634
FBgn0036888	0.0936543	0.13663
FBgn0031070	0.0934631	0.136351
FBgn0039580	0.0934495	0.136331
FBgn0034354	0.0934149	0.13628
FBgn0034455	0.0933159	0.136135
FBgn0030479	0.0931518	0.135895
FBgn0001090	0.0929759	0.135638
FBgn0038326	0.0929539	0.135606
FBgn0037875	0.0928148	0.135402
FBgn0250906	0.0927292	0.135277
FBgn0033454	0.0924984	0.134939
FBgn0052654	0.0923352	0.134701
FBgn0002931	0.092137	0.134411
FBgn0034913	0.0920781	0.134324
FBgn0034075	0.09197	0.134166
FBgn0026702	0.0919474	0.134133
FBgn0004584	0.0918422	0.133979
FBgn0029970	0.0918292	0.13396
FBgn0034915	0.0918153	0.13394
FBgn0004638	0.091811	0.133934
FBgn0037342	0.0918042	0.133924
FBgn0052262	0.0917498	0.133844
FBgn0033884	0.0917468	0.13384
FBgn0030096	0.0917198	0.1338
FBgn0011774	0.0916984	0.133769
FBgn0020545	0.0914994	0.133478
FBgn0000216	0.091355	0.133267
FBgn0036775	0.0912191	0.133068
FBgn0034878	0.0911411	0.132954
FBgn0023001	0.0909276	0.132642
FBgn0000455	0.0909147	0.132623
FBgn0034540	0.0908932	0.132591
FBgn0026323	0.0908909	0.132588
FBgn0037478	0.0908793	0.132571
FBgn0086785	0.0908581	0.13254
FBgn0001325	0.0906596	0.132249
FBgn0032015	0.090475	0.131979
FBgn0032487	0.0902289	0.131619
FBgn0030519	0.0902227	0.13161
FBgn0037608	0.0902205	0.131607
FBgn0001965	0.0900691	0.131386
FBgn0001077	0.0900177	0.13131
FBgn0036818	0.0898976	0.131135
FBgn0052438	0.0897881	0.130975
FBgn0052441	0.0897614	0.130936
FBgn0033085	0.0897354	0.130898
FBgn0036096	0.0897085	0.130858
FBgn0035632	0.0895841	0.130676
FBgn0023177	0.0895454	0.13062
FBgn0038810	0.0893677	0.13036
FBgn0046247	0.0892206	0.130144
FBgn0035533	0.0892159	0.130138
FBgn0086130	0.0890354	0.129874
FBgn0030114	0.0890086	0.129834
FBgn0004369	0.0889859	0.129801
FBgn0032988	0.0889187	0.129703
FBgn0030091	0.0887888	0.129513
FBgn0040475	0.0886098	0.129251
FBgn0003941	0.0884121	0.128962
FBgn0040290	0.0883677	0.128897
FBgn0023130	0.0883265	0.128836
FBgn0050342	0.08822	0.128681
FBgn0037489	0.088203	0.128656
FBgn0038327	0.088174	0.128613
FBgn0004463	0.0881585	0.128591
FBgn0030049	0.0881288	0.128547
FBgn0039691	0.0880621	0.12845
FBgn0011300	0.0880459	0.128426
FBgn0035026	0.0879824	0.128333
FBgn0038738	0.0879512	0.128288
FBgn0004378	0.0879391	0.12827
FBgn0030670	0.0878939	0.128204
FBgn0031312	0.0878777	0.12818
FBgn0030087	0.0877855	0.128045
FBgn0001970	0.0877323	0.127967
FBgn0030669	0.0877122	0.127938
FBgn0085478	0.0874371	0.127535
FBgn0002441	0.0874228	0.127515
FBgn0051717	0.0874216	0.127513
FBgn0002579	0.0873867	0.127462
FBgn0039067	0.0873335	0.127384
FBgn0014023	0.0873047	0.127342
FBgn0001316	0.087215	0.127211
FBgn0039189	0.0871399	0.127101
FBgn0053969	0.0870943	0.127034
FBgn0011706	0.0870943	0.127034
FBgn0050349	0.0870398	0.126954
FBgn0011655	0.0870395	0.126954
FBgn0037207	0.0869912	0.126883
FBgn0036688	0.0868789	0.126719
FBgn0021765	0.0865408	0.126224
FBgn0004876	0.0863598	0.12596
FBgn0031090	0.0862339	0.125775
FBgn0004432	0.0862056	0.125734
FBgn0053526	0.0860593	0.12552
FBgn0032407	0.0859613	0.125377
FBgn0026080	0.0859248	0.125323
FBgn0036536	0.0858795	0.125257
FBgn0032656	0.085867	0.125239
FBgn0032499	0.0858214	0.125172
FBgn0033260	0.0856273	0.124888
FBgn0051713	0.0855465	0.12477
FBgn0030710	0.0855187	0.124729
FBgn0035315	0.0854485	0.124626
FBgn0026777	0.0854267	0.124595
FBgn0004828	0.0852753	0.124373
FBgn0039068	0.0850834	0.124092
FBgn0036105	0.0850333	0.124019
FBgn0035656	0.0849679	0.123923
FBgn0035902	0.084936	0.123877
FBgn0033990	0.0849267	0.123863
FBgn0037446	0.0848599	0.123765
FBgn0052095	0.0848493	0.12375
FBgn0053207	0.0846939	0.123523
FBgn0034970	0.0846707	0.123489
FBgn0034307	0.0846303	0.12343
FBgn0030000	0.0846201	0.123415
FBgn0039183	0.0846042	0.123391
FBgn0028484	0.0845174	0.123264
FBgn0033813	0.0844114	0.123109
FBgn0031114	0.0844082	0.123105
FBgn0037933	0.0843289	0.122989
FBgn0032047	0.0842603	0.122888
FBgn0030274	0.0842416	0.122861
FBgn0033740	0.0840572	0.122591
FBgn0014868	0.0840013	0.122509
FBgn0005386	0.0840006	0.122508
FBgn0037344	0.0839693	0.122463
FBgn0000146	0.083968	0.122461
FBgn0037844	0.0836448	0.121988
FBgn0025832	0.083563	0.121868
FBgn0039026	0.0834301	0.121674
FBgn0000810	0.0834241	0.121665
FBgn0027330	0.0833453	0.12155
FBgn0038306	0.0833446	0.121549
FBgn0052528	0.0833261	0.121522
FBgn0003463	0.0832131	0.121356
FBgn0037713	0.0830824	0.121165
FBgn0031050	0.0830282	0.121086
FBgn0051229	0.0828368	0.120806
FBgn0032799	0.0824979	0.12031
FBgn0033380	0.0823992	0.120166
FBgn0051635	0.0823712	0.120125
FBgn0020261	0.0823668	0.120118
FBgn0000542	0.0823227	0.120054
FBgn0031344	0.0823207	0.120051
FBgn0038360	0.0823083	0.120033
FBgn0030342	0.0823059	0.120029
FBgn0028292	0.0822695	0.119976
FBgn0033540	0.0821998	0.119874
FBgn0051251	0.0821207	0.119758
FBgn0010355	0.0820858	0.119707
FBgn0043903	0.0820389	0.119639
FBgn0063493	0.081978	0.11955
FBgn0031037	0.081875	0.119399
FBgn0015553	0.0816974	0.119139
FBgn0004110	0.0816942	0.119135
FBgn0051852	0.0816759	0.119108
FBgn0261111	0.0816593	0.119083
FBgn0039073	0.0816238	0.119032
FBgn0010340	0.0813915	0.118692
FBgn0061476	0.0813418	0.118619
FBgn0035025	0.0813396	0.118616
FBgn0031091	0.0812686	0.118512
FBgn0038491	0.0811266	0.118304
FBgn0032705	0.0810856	0.118244
FBgn0263391	0.0810528	0.118196
FBgn0038947	0.0810216	0.118151
FBgn0033185	0.0809922	0.118108
FBgn0037336	0.0809304	0.118017
FBgn0002973	0.0808076	0.117838
FBgn0003866	0.0807885	0.11781
FBgn0037943	0.0807754	0.11779
FBgn0026259	0.0807731	0.117787
FBgn0004957	0.080694	0.117671
FBgn0039636	0.0806783	0.117648
FBgn0039776	0.0805914	0.117521
FBgn0026252	0.0805712	0.117492
FBgn0034564	0.0805562	0.11747
FBgn0010292	0.0804965	0.117382
FBgn0033934	0.0804298	0.117285
FBgn0032329	0.0804174	0.117267
FBgn0034001	0.0803202	0.117125
FBgn0038432	0.0803123	0.117113
FBgn0030890	0.0802654	0.117044
FBgn0039336	0.0801722	0.116908
FBgn0029079	0.0799458	0.116577
FBgn0035590	0.0798497	0.116436
FBgn0260855	0.0798407	0.116423
FBgn0033528	0.0797303	0.116262
FBgn0037884	0.0796521	0.116147
FBgn0027784	0.079649	0.116143
FBgn0058045	0.0796402	0.11613
FBgn0037250	0.079635	0.116122
FBgn0039303	0.079596	0.116065
FBgn0039680	0.0795683	0.116025
FBgn0029785	0.0795656	0.116021
FBgn0010303	0.0795276	0.115965
FBgn0033169	0.0795183	0.115952
FBgn0000533	0.0793974	0.115775
FBgn0086129	0.0791851	0.115464
FBgn0035333	0.0790594	0.11528
FBgn0034643	0.0790571	0.115277
FBgn0037117	0.0790084	0.115206
FBgn0032242	0.0788894	0.115032
FBgn0020249	0.0788863	0.115027
FBgn0032243	0.0787906	0.114887
FBgn0030973	0.0787903	0.114887
FBgn0037301	0.0787886	0.114884
FBgn0039013	0.078731	0.1148
FBgn0033183	0.0786113	0.114625
FBgn0038318	0.0785902	0.114594
FBgn0033261	0.0785324	0.114509
FBgn0031054	0.0785211	0.114493
FBgn0003008	0.0785172	0.114487
FBgn0029929	0.078403	0.11432
FBgn0260655	0.0782585	0.114109
FBgn0050020	0.0782501	0.114096
FBgn0030056	0.0781349	0.113928
FBgn0030336	0.0779048	0.113591
FBgn0038964	0.0777815	0.113411
FBgn0030863	0.0776491	0.113217
FBgn0036373	0.0774904	0.112985
FBgn0032921	0.0774845	0.112976
FBgn0037328	0.0774033	0.112858
FBgn0031360	0.0772973	0.112703
FBgn0036299	0.0772694	0.112662
FBgn0002906	0.0772396	0.112618
FBgn0024244	0.0771304	0.112458
FBgn0003892	0.0770143	0.112289
FBgn0025720	0.0770039	0.112273
FBgn0034114	0.0770012	0.112269
FBgn0029067	0.0769797	0.112238
FBgn0031606	0.0769248	0.112158
FBgn0039379	0.0768602	0.112063
FBgn0033463	0.0767966	0.11197
FBgn0261608	0.0767615	0.111919
FBgn0031883	0.076759	0.111915
FBgn0000606	0.0767425	0.111891
FBgn0030753	0.07652	0.111565
FBgn0030668	0.0764376	0.111445
FBgn0038609	0.0763913	0.111377
FBgn0003169	0.0763105	0.111259
FBgn0002921	0.0763076	0.111255
FBgn0001084	0.0762709	0.111201
FBgn0004921	0.0762629	0.111189
FBgn0030678	0.0759653	0.110754
FBgn0034902	0.0758254	0.110549
FBgn0033101	0.0758047	0.110519
FBgn0042205	0.0757576	0.11045
FBgn0032377	0.0757218	0.110398
FBgn0052409	0.0756956	0.11036
FBgn0032596	0.0756352	0.110271
FBgn0030970	0.0756066	0.110229
FBgn0260049	0.0755889	0.110203
FBgn0015664	0.0755704	0.110176
FBgn0261268	0.0755442	0.110138
FBgn0036039	0.0753285	0.109822
FBgn0036772	0.0751961	0.109629
FBgn0038640	0.0750965	0.109483
FBgn0020909	0.0750735	0.109449
FBgn0033021	0.0748039	0.109055
FBgn0003721	0.0747977	0.109046
FBgn0085424	0.0747503	0.108977
FBgn0038071	0.0745544	0.10869
FBgn0039135	0.0745514	0.108686
FBgn0037358	0.074539	0.108668
FBgn0026361	0.0744731	0.108571
FBgn0036801	0.0744468	0.108533
FBgn0030486	0.0744425	0.108526
FBgn0003175	0.0743921	0.108453
FBgn0031696	0.0743179	0.108344
FBgn0035121	0.0742615	0.108262
FBgn0260990	0.0742212	0.108203
FBgn0024245	0.0742196	0.1082
FBgn0262716	0.0741993	0.108171
FBgn0037045	0.0740653	0.107975
FBgn0052675	0.0739256	0.10777
FBgn0039908	0.0738248	0.107623
FBgn0033413	0.0737218	0.107472
FBgn0052264	0.0736995	0.10744
FBgn0004607	0.0736371	0.107348
FBgn0039904	0.0736225	0.107327
FBgn0036058	0.0735573	0.107232
FBgn0038519	0.0735029	0.107152
FBgn0011232	0.0731751	0.106672
FBgn0051368	0.0730941	0.106554
FBgn0030530	0.0730616	0.106506
FBgn0038106	0.0729963	0.106411
FBgn0003486	0.0729477	0.10634
FBgn0038388	0.0727973	0.10612
FBgn0011205	0.0727899	0.106109
FBgn0003028	0.0727778	0.106091
FBgn0020385	0.0727151	0.105999
FBgn0046214	0.0726851	0.105956
FBgn0052707	0.0726226	0.105864
FBgn0004893	0.0725838	0.105807
FBgn0038038	0.0725787	0.1058
FBgn0003250	0.0725482	0.105755
FBgn0043002	0.0725187	0.105712
FBgn0030341	0.072487	0.105666
FBgn0020647	0.0724735	0.105646
FBgn0004635	0.0724472	0.105608
FBgn0035336	0.0724455	0.105605
FBgn0024432	0.0724275	0.105579
FBgn0037236	0.0721803	0.105217
FBgn0003984	0.0721779	0.105214
FBgn0050423	0.0721181	0.105126
FBgn0004913	0.0720703	0.105056
FBgn0003134	0.0720539	0.105032
FBgn0036317	0.072029	0.104996
FBgn0000721	0.0719629	0.104899
FBgn0051224	0.0719614	0.104897
FBgn0041585	0.0719459	0.104874
FBgn0005616	0.0717182	0.104541
FBgn0260444	0.0716813	0.104487
FBgn0011656	0.0716778	0.104482
FBgn0034248	0.0716616	0.104458
FBgn0038488	0.0716461	0.104436
FBgn0000239	0.0714561	0.104158
FBgn0011761	0.0713383	0.103985
FBgn0040389	0.0712537	0.103862
FBgn0042712	0.0712171	0.103808
FBgn0030088	0.0709715	0.103449
FBgn0047178	0.0709333	0.103393
FBgn0017545	0.0709188	0.103372
FBgn0034722	0.0708961	0.103339
FBgn0051800	0.0708101	0.103213
FBgn0030716	0.070775	0.103161
FBgn0027334	0.0706791	0.103021
FBgn0022960	0.0706776	0.103019
FBgn0010247	0.070606	0.102914
FBgn0038984	0.0705621	0.10285
FBgn0030686	0.0705254	0.102796
FBgn0030545	0.0704909	0.102746
FBgn0086655	0.0702831	0.102442
FBgn0005640	0.0702714	0.102425
FBgn0039881	0.0702251	0.102357
FBgn0036886	0.0699664	0.101979
FBgn0014906	0.0698323	0.101782
FBgn0039889	0.0698248	0.101771
FBgn0038150	0.0698185	0.101762
FBgn0004132	0.069754	0.101668
FBgn0037137	0.0696835	0.101565
FBgn0039130	0.0696635	0.101536
FBgn0003742	0.0695552	0.101377
FBgn0001179	0.0695389	0.101353
FBgn0010109	0.069403	0.101155
FBgn0004374	0.0693707	0.101107
FBgn0003656	0.0692569	0.100941
FBgn0039773	0.0692315	0.100904
FBgn0041188	0.0692159	0.100881
FBgn0030551	0.069215	0.100879
FBgn0040754	0.0691406	0.100771
FBgn0051472	0.0690243	0.1006
FBgn0030752	0.068988	0.100547
FBgn0030850	0.0689698	0.100521
FBgn0010607	0.0689559	0.1005
FBgn0001624	0.0688984	0.100416
FBgn0030791	0.0688933	0.100409
FBgn0031947	0.0688833	0.100394
FBgn0036973	0.0688371	0.100327
FBgn0032961	0.0686218	0.100012
FBgn0035024	0.0685999	0.0999796
FBgn0001075	0.068566	0.0999301
FBgn0036406	0.0685526	0.0999104
FBgn0063670	0.0685417	0.0998945
FBgn0025807	0.068371	0.0996448
FBgn0005617	0.0682709	0.0994984
FBgn0010504	0.0682215	0.0994262
FBgn0051122	0.0681763	0.09936
FBgn0001320	0.0678988	0.0989541
FBgn0034919	0.0678335	0.0988585
FBgn0039120	0.0677161	0.0986868
FBgn0250788	0.0676321	0.0985639
FBgn0035854	0.0675963	0.0985115
FBgn0037831	0.0675648	0.0984655
FBgn0031391	0.0675645	0.098465
FBgn0038331	0.0675432	0.0984338
FBgn0038767	0.067457	0.0983078
FBgn0026722	0.0673969	0.0982199
FBgn0051998	0.0673969	0.0982199
FBgn0033951	0.0673716	0.0981829
FBgn0034231	0.0673708	0.0981816
FBgn0053094	0.0673457	0.098145
FBgn0042138	0.0673241	0.0981133
FBgn0030243	0.0673053	0.0980858
FBgn0026084	0.0671115	0.0978024
FBgn0031492	0.0671112	0.097802
FBgn0036746	0.0670514	0.0977145
FBgn0260639	0.0670396	0.0976972
FBgn0001174	0.0670305	0.0976838
FBgn0051441	0.0670032	0.0976439
FBgn0027280	0.0669905	0.0976253
FBgn0031051	0.0669607	0.0975818
FBgn0047114	0.0668724	0.0974526
FBgn0039227	0.0668472	0.0974157
FBgn0039731	0.0667472	0.0972694
FBgn0051064	0.0666805	0.0971719
FBgn0030854	0.0666737	0.0971619
FBgn0051125	0.0666636	0.0971471
FBgn0038223	0.066502	0.0969107
FBgn0004512	0.0664854	0.0968865
FBgn0030838	0.066435	0.0968128
FBgn0038737	0.0662755	0.0965794
FBgn0037702	0.0662667	0.0965665
FBgn0004889	0.0662365	0.0965224
FBgn0010548	0.0661218	0.0963546
FBgn0031008	0.0659672	0.0961284
FBgn0005427	0.065938	0.0960858
FBgn0033352	0.0658597	0.0959712
FBgn0038772	0.0658565	0.0959666
FBgn0037317	0.0658247	0.09592
FBgn0033661	0.0657898	0.0958689
FBgn0029123	0.0657758	0.0958485
FBgn0030327	0.0657438	0.0958016
FBgn0002872	0.0657359	0.0957901
FBgn0032701	0.0657321	0.0957845
FBgn0020616	0.0657317	0.0957839
FBgn0041630	0.0657052	0.0957452
FBgn0030699	0.0656954	0.0957309
FBgn0030502	0.0656818	0.0957109
FBgn0036386	0.0656769	0.0957038
FBgn0011703	0.0656329	0.0956394
FBgn0036900	0.0655503	0.0955186
FBgn0028687	0.0655284	0.0954866
FBgn0019938	0.0654413	0.0953592
FBgn0036036	0.0654067	0.0953085
FBgn0035204	0.0653803	0.09527
FBgn0050372	0.0653722	0.0952581
FBgn0037109	0.0653368	0.0952062
FBgn0036188	0.0653182	0.095179
FBgn0003502	0.0652623	0.0950973
FBgn0038332	0.0652425	0.0950684
FBgn0002715	0.0652358	0.0950585
FBgn0023174	0.0652095	0.09502
FBgn0034734	0.0651958	0.095
FBgn0031981	0.0650927	0.0948492
FBgn0035878	0.065084	0.0948364
FBgn0029980	0.0649914	0.094701
FBgn0086350	0.0649068	0.0945772
FBgn0034060	0.0648748	0.0945304
FBgn0037384	0.0648264	0.0944596
FBgn0262512	0.0648161	0.0944445
FBgn0035713	0.0648114	0.0944377
FBgn0037019	0.0648016	0.0944234
FBgn0035473	0.0647507	0.094349
FBgn0014022	0.0647235	0.0943091
FBgn0035252	0.064699	0.0942732
FBgn0032700	0.0645542	0.0940614
FBgn0010660	0.0645535	0.0940604
FBgn0035488	0.0645128	0.0940009
FBgn0043070	0.0645046	0.0939889
FBgn0030694	0.0644919	0.0939704
FBgn0035831	0.064488	0.0939646
FBgn0034054	0.0644738	0.0939438
FBgn0039110	0.064454	0.0939149
FBgn0039404	0.0644163	0.0938597
FBgn0039627	0.0643466	0.0937578
FBgn0037350	0.0642655	0.0936392
FBgn0039589	0.0642523	0.0936198
FBgn0261599	0.0642268	0.0935825
FBgn0002643	0.0641811	0.0935157
FBgn0031640	0.0641247	0.0934332
FBgn0039650	0.0641075	0.093408
FBgn0025457	0.0640948	0.0933893
FBgn0024909	0.0640941	0.0933885
FBgn0037473	0.0639884	0.0932338
FBgn0023527	0.0639781	0.0932187
FBgn0038583	0.0639549	0.0931848
FBgn0003116	0.0638931	0.0930943
FBgn0015544	0.0638794	0.0930743
FBgn0260442	0.0638739	0.0930663
FBgn0035959	0.0638671	0.0930563
FBgn0000719	0.0638418	0.0930193
FBgn0003317	0.0638373	0.0930127
FBgn0033554	0.063738	0.0928675
FBgn0030700	0.0636716	0.0927703
FBgn0033264	0.0636628	0.0927575
FBgn0037370	0.0636601	0.0927535
FBgn0030871	0.0635944	0.0926574
FBgn0263599	0.0635652	0.0926147
FBgn0039860	0.0635565	0.0926019
FBgn0030467	0.063551	0.0925939
FBgn0001148	0.0635311	0.0925648
FBgn0040268	0.0634966	0.0925144
FBgn0039668	0.063312	0.0922443
FBgn0037644	0.0633	0.0922267
FBgn0016119	0.0632261	0.0921187
FBgn0033354	0.0631853	0.0920589
FBgn0028707	0.0630733	0.0918951
FBgn0003997	0.0630035	0.091793
FBgn0013733	0.0629967	0.0917831
FBgn0035593	0.0629779	0.0917555
FBgn0037760	0.0627346	0.0913996
FBgn0040388	0.0626991	0.0913477
FBgn0003114	0.0626836	0.091325
FBgn0039359	0.0625706	0.0911598
FBgn0033473	0.062565	0.0911515
FBgn0035122	0.0625135	0.0910762
FBgn0033226	0.062488	0.0910389
FBgn0003227	0.0624633	0.0910027
FBgn0038039	0.0622225	0.0906506
FBgn0027607	0.06221	0.0906323
FBgn0032341	0.062163	0.0905635
FBgn0035542	0.0621263	0.0905099
FBgn0086362	0.0621146	0.0904926
FBgn0038948	0.0621107	0.0904869
FBgn0052251	0.0620581	0.09041
FBgn0032259	0.0620563	0.0904074
FBgn0261602	0.0619511	0.0902535
FBgn0035335	0.0619409	0.0902387
FBgn0033272	0.0618452	0.0900986
FBgn0041604	0.0618255	0.0900698
FBgn0026616	0.0618125	0.0900508
FBgn0003410	0.0617637	0.0899794
FBgn0037347	0.0617368	0.0899401
FBgn0026262	0.0616995	0.0898855
FBgn0035830	0.0616625	0.0898313
FBgn0032515	0.0616377	0.089795
FBgn0038806	0.0615441	0.0896581
FBgn0037371	0.0614879	0.089576
FBgn0030945	0.0614469	0.089516
FBgn0000416	0.0614107	0.089463
FBgn0086134	0.0613689	0.0894018
FBgn0030790	0.061361	0.0893903
FBgn0014133	0.0613592	0.0893876
FBgn0005536	0.0613325	0.0893485
FBgn0030505	0.0613041	0.089307
FBgn0041092	0.0612832	0.0892765
FBgn0036398	0.0612636	0.0892478
FBgn0003607	0.0612499	0.0892278
FBgn0030673	0.0612226	0.0891879
FBgn0013746	0.0612037	0.0891602
FBgn0030418	0.0611672	0.0891068
FBgn0030792	0.0611671	0.0891066
FBgn0016078	0.061161	0.0890977
FBgn0004359	0.0611378	0.0890637
FBgn0031315	0.0610953	0.0890017
FBgn0039132	0.0610183	0.0888889
FBgn0039665	0.0609901	0.0888477
FBgn0000489	0.0609817	0.0888354
FBgn0034501	0.060941	0.088776
FBgn0035437	0.0609301	0.0887599
FBgn0045063	0.0608307	0.0886145
FBgn0037240	0.0605933	0.0882672
FBgn0065035	0.0604939	0.0881218
FBgn0016984	0.0604343	0.0880346
FBgn0051658	0.0603596	0.0879254
FBgn0035145	0.0601444	0.0876105
FBgn0036640	0.0600512	0.0874743
FBgn0031399	0.0600426	0.0874617
FBgn0263351	0.0599954	0.0873926
FBgn0035443	0.0599746	0.0873622
FBgn0030435	0.059799	0.0871054
FBgn0014877	0.0597885	0.08709
FBgn0034803	0.0597742	0.0870691
FBgn0036487	0.0597676	0.0870594
FBgn0086447	0.0597673	0.0870589
FBgn0261479	0.0597421	0.0870221
FBgn0033179	0.0597331	0.087009
FBgn0026083	0.0596665	0.0869115
FBgn0011204	0.0596569	0.0868975
FBgn0038057	0.0596393	0.0868717
FBgn0034083	0.059636	0.0868668
FBgn0020930	0.059631	0.0868596
FBgn0031381	0.0595043	0.0866742
FBgn0003660	0.0594472	0.0865907
FBgn0032393	0.0593942	0.0865131
FBgn0021856	0.059386	0.0865011
FBgn0003360	0.0593828	0.0864964
FBgn0037022	0.0593638	0.0864687
FBgn0001085	0.0593396	0.0864333
FBgn0035073	0.0593216	0.086407
FBgn0039020	0.0592948	0.0863678
FBgn0033802	0.0591852	0.0862075
FBgn0030451	0.0591556	0.0861642
FBgn0037368	0.0591105	0.0860982
FBgn0000221	0.0590792	0.0860524
FBgn0039966	0.0590591	0.086023
FBgn0050000	0.0589397	0.0858483
FBgn0004657	0.058918	0.0858166
FBgn0038981	0.0588754	0.0857542
FBgn0031304	0.058792	0.0856323
FBgn0051040	0.0587716	0.0856023
FBgn0020440	0.0587255	0.085535
FBgn0028530	0.0586856	0.0854766
FBgn0052423	0.0586792	0.0854672
FBgn0036271	0.0585999	0.0853513
FBgn0026620	0.0584646	0.0851534
FBgn0037652	0.0583617	0.0850029
FBgn0004875	0.0582363	0.0848194
FBgn0038196	0.0581699	0.0847222
FBgn0038128	0.0581338	0.0846693
FBgn0261933	0.0581223	0.0846526
FBgn0038536	0.0581032	0.0846247
FBgn0035965	0.0578581	0.0842661
FBgn0036538	0.057818	0.0842075
FBgn0029134	0.0577966	0.0841762
FBgn0003074	0.0577009	0.0840362
FBgn0035444	0.0576794	0.0840047
FBgn0030030	0.0575584	0.0838277
FBgn0035106	0.0575208	0.0837727
FBgn0030245	0.0574653	0.0836916
FBgn0033897	0.0574496	0.0836685
FBgn0030787	0.0574482	0.0836665
FBgn0050383	0.0573666	0.0835471
FBgn0036450	0.0573599	0.0835373
FBgn0038303	0.0572318	0.0833499
FBgn0023542	0.0570857	0.0831362
FBgn0032222	0.0569907	0.0829972
FBgn0002780	0.0568746	0.0828274
FBgn0261535	0.0568732	0.0828254
FBgn0036691	0.0568549	0.0827986
FBgn0052666	0.0568309	0.0827635
FBgn0029158	0.0568248	0.0827545
FBgn0014189	0.0567384	0.0826282
FBgn0029905	0.0567105	0.0825874
FBgn0036248	0.0565996	0.0824251
FBgn0000394	0.0565637	0.0823727
FBgn0260991	0.0564895	0.0822641
FBgn0011660	0.0564599	0.0822208
FBgn0039920	0.0562007	0.0818415
FBgn0052022	0.0561926	0.0818297
FBgn0040571	0.0561343	0.0817444
FBgn0034027	0.0560453	0.0816142
FBgn0052982	0.0560271	0.0815876
FBgn0033460	0.0558536	0.0813338
FBgn0035521	0.0556507	0.081037
FBgn0037900	0.0556146	0.0809842
FBgn0010380	0.0554283	0.0807117
FBgn0002948	0.0554257	0.0807079
FBgn0004648	0.0554185	0.0806973
FBgn0028648	0.0553625	0.0806155
FBgn0011509	0.0552204	0.0804076
FBgn0052075	0.055194	0.0803689
FBgn0025640	0.0551799	0.0803484
FBgn0067629	0.0551776	0.080345
[truncated: 9,583 more rows]

## Sheet: TableS5
Table S5. Gene Ontology (GO) and functional clustering analysis by DAVID for 500 most likely essential or non-essential genes of C. elegans (top 5 clusters)
Gene Ontology followed by functional clustering analysis were performed using selections of the 500 most-likely "essential" or "non-essential" genes of C. elegans defined by an XGB model trained with D. melanogaster data
Essential:
Annotation Cluster 1	Source	Enrichment Score: 39.63	Count	P-value	Benjamini
	UP_KEYWORDS	Ribonucleoprotein	71	2.8e-68	2.6e-66
	GOTERM_BP_DIRECT	translation	91	4.3e-63	6.6e-61
	UP_KEYWORDS	Ribosomal protein	58	5.8e-55	3.6e-53
	GOTERM_CC_DIRECT	intracellular ribonucleoprotein complex	65	8.8e-53	2.8e-50
	GOTERM_CC_DIRECT	ribosome	58	2.8e-41	2.9e-39
	GOTERM_MF_DIRECT	structural constituent of ribosome	58	5.2e-34	1.7e-31
	GOTERM_CC_DIRECT	cytosolic large ribosomal subunit	30	1.4e-27	1.1e-25
	GOTERM_CC_DIRECT	cytosolic small ribosomal subunit	24	1.5e-24	9.2e-23
	KEGG_PATHWAY	Ribosome	58	1.9e-24	1.3e-22
	GOTERM_CC_DIRECT	intracellular	48	1.4e-12	4.7e-11
Annotation Cluster 2	Source	Enrichment Score: 30.95	Count	P-value	Benjamini
	UP_KEYWORDS	Nucleotide-binding	101	4.7e-46	2.2e-44
	UP_KEYWORDS	ATP-binding	88	3.7e-42	1.4e-40
	GOTERM_MF_DIRECT	nucleotide binding	119	3e-24	3.2e-22
	GOTERM_MF_DIRECT	ATP binding	95	3e-14	1.6e-12
Annotation Cluster 3	Source	Enrichment Score: 12.88	Count	P-value	Benjamini
	UP_KEYWORDS	Cell cycle	30	1.8e-20	3.4e-19
	GOTERM_BP_DIRECT	cell cycle	32	1e-15	5.4e-14
	GOTERM_BP_DIRECT	mitotic nuclear division	28	2.6e-14	1.3e-12
	UP_KEYWORDS	Cell division	22	3.4e-14	4.2e-13
	UP_KEYWORDS	Mitosis	18	2.4e-13	2.8e-12
	GOTERM_BP_DIRECT	cell division	27	9.6e-12	4.1e-10
	GOTERM_CC_DIRECT	chromosome, centromeric region	8	2.1e-05	0.00018
Annotation Cluster 4	Source	Enrichment Score: 12.57	Count	P-value	Benjamini
	UP_KEYWORDS	Protein biosynthesis	33	1.8e-32	5.6e-31
	UP_KEYWORDS	Aminoacyl-tRNA synthetase	18	1.7e-19	2.8e-18
	UP_KEYWORDS	Ligase	26	6.1e-17	9e-16
	GOTERM_MF_DIRECT	aminoacyl-tRNA ligase activity	18	1.7e-14	1.1e-12
	GOTERM_BP_DIRECT	tRNA aminoacylation for protein translation	14	2.1e-11	8e-10
	INTERPRO	Aminoacyl-tRNA synthetase, class II	9	1.6e-09	2.7e-07
	GOTERM_MF_DIRECT	ligase activity	24	4.6e-09	1.8e-07
	INTERPRO	Rossmann-like alpha/beta/alpha sandwich fold	9	1.4e-05	0.00056
	KEGG_PATHWAY	Aminoacyl-tRNA biosynthesis	17	1	1
Annotation Cluster 5	Source	Enrichment Score: 11.69	Count	P-value	Benjamini
	UP_KEYWORDS	Cytoskeleton	32	6.2e-17	9e-16
	GOTERM_CC_DIRECT	microtubule organizing center	12	3.1e-10	7.5e-09
	GOTERM_CC_DIRECT	cytoskeleton	32	4.4e-10	9.7e-09
Non-Essential:
Annotation Cluster 1	Source	Enrichment Score: 28.5	Count	P-value	Benjamini
	SMART	MATH	30	8.5e-32	3.2e-30
	INTERPRO	MATH	31	1.4e-28	2.6e-26
	INTERPRO	TRAF-like	30	2.5e-27	2.3e-25
Annotation Cluster 2	Source	Enrichment Score: 8.89	Count	P-value	Benjamini
	INTERPRO	F-box domain, cyclin-like	36	1.9e-13	8.6e-12
	INTERPRO	Domain of unknown function DUF38, Caenorhabditis species	25	1.3e-10	4e-09
	SMART	FBOX	13	8.4e-05	0.0011
Annotation Cluster 3	Source	Enrichment Score: 4.95	Count	P-value	Benjamini
	GOTERM_CC_DIRECT	integral component of membrane	137	2.6e-14	6.3e-13
	GOTERM_CC_DIRECT	membrane	133	1.5e-11	1.8e-10
	UP_KEYWORDS	Transmembrane helix	135	0.74	1
	UP_KEYWORDS	Transmembrane	135	0.74	1
	UP_KEYWORDS	Membrane	135	0.86	1
Annotation Cluster 4	Source	Enrichment Score: 4.13	Count	P-value	Benjamini
	GOTERM_MF_DIRECT	RNA transmembrane transporter activity	4	2.6e-05	0.0019
	GOTERM_BP_DIRECT	dsRNA transport	4	4.1e-05	0.0039
	INTERPRO	SID1 transmembrane family	4	0.00036	0.0051
Annotation Cluster 5	Source	Enrichment Score: 3.71	Count	P-value	Benjamini
	SMART	BTB	12	2.3e-05	0.00044
	INTERPRO	BTB/POZ-like	13	8.3e-05	0.0015
	INTERPRO	BTB/POZ fold	14	0.00015	0.0023
	GOTERM_BP_DIRECT	protein homooligomerization	6	0.00023	0.011
	INTERPRO	Potassium channel tetramerisation-type BTB domain	6	0.0042	0.051

## Sheet: TableS6
Table S6. Gene Ontology (GO) and functional clustering analysis by DAVID for 500 most likely essential or non-essential genes of D. melanogaster (top 5 clusters)
Gene Ontology followed by functional clustering analysis were performed using selections of the 500 most-likely "essential" or "non-essential" genes of D. melanogaster defined by an XGB model trained with C. elegans data
Essential:
Annotation Cluster 1	Source	Enrichment Score: 15.37	Count	P-value	Benjamini
	UP_KEYWORDS	Ribonucleoprotein	59	3.7e-37	3.9e-35
	UP_KEYWORDS	Ribosomal protein	52	1e-33	7.3e-32
	GOTERM_CC_DIRECT	ribosome	32	1.2e-18	2.2e-16
	GOTERM_BP_DIRECT	cytoplasmic translation	31	3.7e-18	2.4e-15
	GOTERM_MF_DIRECT	structural constituent of ribosome	52	4.2e-16	1.5e-13
	GOTERM_CC_DIRECT	cytosolic small ribosomal subunit	17	2.9e-11	1.8e-09
	KEGG_PATHWAY	Ribosome	45	4.7e-08	3.3e-06
	GOTERM_CC_DIRECT	cytosolic large ribosomal subunit	15	1.9e-07	7.2e-06
	GOTERM_CC_DIRECT	cytosolic ribosome	21	1.7e-05	0.00042
	GOTERM_BP_DIRECT	translation	47	5.7e-05	0.0045
Annotation Cluster 2	Source	Enrichment Score: 10.17	Count	P-value	Benjamini
	GOTERM_BP_DIRECT	mRNA splicing, via spliceosome	41	6.1e-15	2e-12
	GOTERM_CC_DIRECT	precatalytic spliceosome	32	5.9e-13	6.2e-11
	GOTERM_CC_DIRECT	catalytic step 2 spliceosome	27	9.9e-11	5.3e-09
	KEGG_PATHWAY	Spliceosome	25	5.6e-05	0.002
Annotation Cluster 3	Source	Enrichment Score: 7.94	Count	P-value	Benjamini
	UP_KEYWORDS	Transcription	49	5.1e-12	1.8e-10
	UP_KEYWORDS	Transcription regulation	43	1.1e-09	3e-08
	GOTERM_BP_DIRECT	transcription, DNA-templated	32	0.00027	0.013
Annotation Cluster 4	Source	Enrichment Score: 5.68	Count	P-value	Benjamini
	UP_KEYWORDS	Nucleotide-binding	60	6.2e-10	1.8e-08
	INTERPRO	P-loop containing nucleoside triphosphate hydrolase	53	6e-09	5.3e-06
	UP_KEYWORDS	ATP-binding	46	2.7e-07	3.5e-06
	GOTERM_MF_DIRECT	ATP binding	53	0.00066	0.02
	UP_SEQ_FEATURE	nucleotide phosphate-binding region:ATP	24	0.062	1
Annotation Cluster 5	Source	Enrichment Score: 4.49	Count	P-value	Benjamini
	UP_KEYWORDS	mRNA splicing	12	1.3e-07	1.9e-06
	UP_KEYWORDS	mRNA processing	13	2.3e-06	2.4e-05
	GOTERM_CC_DIRECT	nuclear speck	7	0.0011	0.014
	GOTERM_BP_DIRECT	regulation of alternative mRNA splicing, via spliceosome	10	0.0034	0.099
Non-Essential:
Annotation Cluster 1	Source	Enrichment Score: 18.03	Count	P-value	Benjamini
	GOTERM_CC_DIRECT	integral component of membrane	178	7.1e-21	8.9e-19
	UP_KEYWORDS	Transmembrane helix	191	6.5e-19	3.8e-17
	UP_KEYWORDS	Transmembrane	191	7.8e-19	3.8e-17
	UP_KEYWORDS	Membrane	197	2.1e-16	7.6e-15
Annotation Cluster 2	Source	Enrichment Score: 5.26	Count	P-value	Benjamini
	UP_SEQ_FEATURE	topological domain:Extracellular	26	5.4e-11	1.1e-08
	UP_SEQ_FEATURE	topological domain:Cytoplasmic	28	3e-10	3.1e-08
	UP_SEQ_FEATURE	transmembrane region	32	1.8e-09	1.2e-07
	UP_KEYWORDS	Receptor	43	4.5e-09	1.3e-07
	UP_KEYWORDS	Transducer	25	1.6e-06	3.9e-05
	UP_SEQ_FEATURE	glycosylation site:N-linked (GlcNAc...)	23	3.5e-06	0.00018
	GOTERM_MF_DIRECT	olfactory receptor activity	16	5.9e-06	0.0015
	GOTERM_BP_DIRECT	detection of chemical stimulus involved in sensory perception of smell	12	1.1e-05	0.0013
	INTERPRO	Olfactory receptor, Drosophila	11	2.3e-05	0.0025
	GOTERM_CC_DIRECT	dendrite membrane	11	5.8e-05	0.0024
	GOTERM_MF_DIRECT	odorant binding	14	6e-05	0.0052
	UP_KEYWORDS	Cell membrane	31	6.1e-05	0.0011
	UP_KEYWORDS	Olfaction	12	0.0002	0.0032
	GOTERM_CC_DIRECT	plasma membrane	47	0.00023	0.0057
	GOTERM_BP_DIRECT	sensory perception of smell	9	0.0017	0.11
	UP_KEYWORDS	Sensory transduction	13	0.0054	0.065
	UP_KEYWORDS	Glycoprotein	27	0.035	0.3
Annotation Cluster 3	Source	Enrichment Score: 3.96	Count	P-value	Benjamini
	GOTERM_BP_DIRECT	proteolysis	38	1.6e-07	7.2e-05
	SMART	Tryp_SPc	23	1.4e-05	0.0014
	GOTERM_MF_DIRECT	serine-type endopeptidase activity	24	3.4e-05	0.0044
	INTERPRO	Peptidase S1	23	4e-05	0.0035
	INTERPRO	Trypsin-like cysteine/serine peptidase domain	23	5.7e-05	0.0042
	INTERPRO	Peptidase S1A, chymotrypsin-type	20	0.0002	0.011
	INTERPRO	Peptidase S1, trypsin family, active site	14	0.0086	0.22
	UP_KEYWORDS	Serine protease	10	0.078	0.54
Annotation Cluster 4	Source	Enrichment Score: 3.59	Count	P-value	Benjamini
	GOTERM_BP_DIRECT	transmembrane transport	25	9.6e-06	0.0013
	INTERPRO	Major facilitator superfamily domain	19	1.8e-05	0.0025
	GOTERM_MF_DIRECT	transmembrane transporter activity	12	9.1e-05	0.0059
	INTERPRO	Major facilitator superfamily	9	0.0055	0.18
	INTERPRO	General substrate transporter	7	0.013	0.26
Annotation Cluster 5	Source	Enrichment Score: 3.41	Count	P-value	Benjamini
	INTERPRO	Lipase, N-terminal	9	8.7e-06	0.0019
	INTERPRO	Lipase	9	8.7e-06	0.0019
	GOTERM_BP_DIRECT	lipid catabolic process	9	0.00019	0.018
	GOTERM_MF_DIRECT	lipase activity	6	0.0025	0.09
	GOTERM_MF_DIRECT	carboxylic ester hydrolase activity	8	0.0071	0.2
	UP_KEYWORDS	Secreted	19	0.014	0.14
